# Supplementary material for: Analysis of cell-type-specific chromatin modifications and gene expression in Drosophila neurons that direct reproductive behavior
Source: PLoS Genet. 2021 Apr 26;17(4):e1009240. doi: 10.1371/journal.pgen.1009240 (PMC8102012; doi:10.1371/journal.pgen.1009240)
Supplement: S1 Table — Excel data table with 4 sheets containing the correlations of all ChIP-seq replicates, sequencing coverage, and lists of genes with bivalent promoters. (XLSX) [file pgen.1009240.s012.xlsx]

## Sheet: READ ME
S1 Table: Replicate correlation, sequencing coverage and genes with bivalent promoters
Sheet number	Sheet	Stage/sex/neuron type	Description
1	Replicate correlations	All	Pairwise spearman correlations for all replicates in data set
2	Sequencing coverage	All	Percentage of bases covered for each chromosome in each data set for H3, H3K27ac, H3K27me3, H3K36me3, H3K4me3, and H3K9me3 (all biological replicates pooled)
3	MACS2 peak count summary	All	Number of total raw, annotated MACS2 peak counts and number of genes containing an annotated MACS2 peak for each modification, sex, and stage
4	Genes with bivalent promoters	All fru P1	Genes with both H3K4me3 and H3K27me3 MACS2 peaks in the promoter region
Additional information:
Sheet 4: Genes that have at least one H3K4me3 and H3K27me3 peak up to 3kb from the promoter region from pooled all replicate peak data. See supporting information data S1 Data-S8 Data.

## Sheet: 1.Replicate correlations
Pairwise Spearman correlations for all ChIP replicates in data set
	Male 48hr APF							Male 1-day adult							Male 10-12 day adult							Male 1-day elav
	'Input_M1_ATCACG_mapped_48h_pupae.bam'	'Input_M2_CGATGT_mapped_48h_pupae.bam'	'Input_M3_TTAGGC_mapped_48h_pupae.bam'	'Input_M4_TGACCA_mapped_48h_pupae.bam'				Input_M1_ATCACG_trimmed_mapped_1d_adult.bam'	Input_M2_CGATGT_trimmed_mapped_1d_adult.bam'	Input_M3_TTAGGC_trimmed_mapped_1d_adult.bam'	Input_M4_TGACCA_trimmed_mapped_1d_adult.bam'				'Input_M1_ATCACG_mapped_10_12d_adult.bam'	'Input_M2_CGATGT_mapped_10_12d_adult.bam'	'Input_M3_TTAGGC_mapped_10_12d_adult.bam'	'Input_M4_TGACCA_mapped_10_12d_adult.bam'				Input_M1_ATCACG_mapped_elav_1d_adult.bam'	Input_M2_CGATGT_mapped_elav_1d_adult.bam'	Input_M3_TTAGGC_mapped_elav_1d_adult.bam'	Input_M4_TGACCA_mapped_elav_1d_adult.bam'
'Input_M1_ATCACG_mapped_48h_pupae.bam'	1	0.98	0.966	0.9801			Input_M1_ATCACG_trimmed_mapped_1d_adult.bam'	1	0.9867	0.9827	0.9885			'Input_M1_ATCACG_mapped_10_12d_adult.bam'	1	0.9898	0.9897	0.9912			Input_M1_ATCACG_mapped_elav_1d_adult.bam'	1	0.9928	0.99	0.9925
'Input_M2_CGATGT_mapped_48h_pupae.bam'	0.98	1	0.989	0.9907			Input_M2_CGATGT_trimmed_mapped_1d_adult.bam'	0.9867	1	0.9825	0.9867			'Input_M2_CGATGT_mapped_10_12d_adult.bam'	0.9898	1	0.9918	0.9928			Input_M2_CGATGT_mapped_elav_1d_adult.bam'	0.9928	1	0.9909	0.9933
'Input_M3_TTAGGC_mapped_48h_pupae.bam'	0.966	0.989	1	0.9864			Input_M3_TTAGGC_trimmed_mapped_1d_adult.bam'	0.9827	0.9825	1	0.9862			'Input_M3_TTAGGC_mapped_10_12d_adult.bam'	0.9897	0.9918	1	0.9921			Input_M3_TTAGGC_mapped_elav_1d_adult.bam'	0.99	0.9909	1	0.9905
'Input_M4_TGACCA_mapped_48h_pupae.bam'	0.9801	0.9907	0.9864	1			Input_M4_TGACCA_trimmed_mapped_1d_adult.bam'	0.9885	0.9867	0.9862	1			'Input_M4_TGACCA_mapped_10_12d_adult.bam'	0.9912	0.9928	0.9921	1			Input_M4_TGACCA_mapped_elav_1d_adult.bam'	0.9925	0.9933	0.9905	1
Average correlation	0.982033		Median correlation	0.98325			Average correlation	0.98555		Median correlation	0.98645			Average correlation	0.991233		Median correlation	0.9915			Average correlation	0.991667		Median correlation	0.9917
	H3K27ac fru P1							H3K27ac fru P1							H3K27ac fru P1							H3K27ac elav
	'H3K27ac_48P_M1_ATCACG_trimmed_mapped.bam'	'H3K27ac_48P_M2_CGATGT_trimmed_mapped.bam'	'H3K27ac_48P_M3_TTAGGC_trimmed_mapped.bam'	'H3K27ac_48P_M4_TGACCA_trimmed_mapped.bam'				H3K27ac_1d_M1_ATCACG_trimmed_mapped.bam'	H3K27ac_1d_M2_CGATGT_trimmed_mapped.bam'	H3K27ac_1d_M3_TTAGGC_trimmed_mapped.bam'	H3K27ac_1d_M4_TGACCA_trimmed_mapped.bam'				'H3K27ac_10-12D_M1_ATCACG_trimmed_mapped.bam'	'H3K27ac_10-12D_M2_CGATGT_trimmed_mapped.bam'	'H3K27ac_10-12D_M3_TTAGGC_trimmed_mapped.bam'	'H3K27ac_10-12D_M4_TGACCA_trimmed_mapped.bam'				'H3K27ac_elav_M1_ATCACG_trimmed_mapped.bam'	'H3K27ac_elav_M2_CGATGT_trimmed_mapped.bam'	'H3K27ac_elav_M3_TTAGGC_trimmed_mapped.bam'	'H3K27ac_elav_M4_TGACCA_trimmed_mapped.bam'
'H3K27ac_48P_M1_ATCACG_trimmed_mapped.bam'	1	0.9664	0.9586	0.9769			H3K27ac_1d_M1_ATCACG_trimmed_mapped.bam'	1	0.9705	0.9498	0.9481			'H3K27ac_10-12D_M1_ATCACG_trimmed_mapped.bam'	1	0.9465	0.9395	0.9224			'H3K27ac_elav_M1_ATCACG_trimmed_mapped.bam'	1	0.9654	0.9731	0.9795
'H3K27ac_48P_M2_CGATGT_trimmed_mapped.bam'	0.9664	1	0.9274	0.9596			H3K27ac_1d_M2_CGATGT_trimmed_mapped.bam'	0.9705	1	0.9591	0.9574			'H3K27ac_10-12D_M2_CGATGT_trimmed_mapped.bam'	0.9465	1	0.9159	0.9031			'H3K27ac_elav_M2_CGATGT_trimmed_mapped.bam'	0.9654	1	0.9431	0.9549
'H3K27ac_48P_M3_TTAGGC_trimmed_mapped.bam'	0.9586	0.9274	1	0.966			H3K27ac_1d_M3_TTAGGC_trimmed_mapped.bam'	0.9498	0.9591	1	0.9643			'H3K27ac_10-12D_M3_TTAGGC_trimmed_mapped.bam'	0.9395	0.9159	1	0.9236			'H3K27ac_elav_M3_TTAGGC_trimmed_mapped.bam'	0.9731	0.9431	1	0.9841
'H3K27ac_48P_M4_TGACCA_trimmed_mapped.bam'	0.9769	0.9596	0.966	1			H3K27ac_1d_M4_TGACCA_trimmed_mapped.bam'	0.9481	0.9574	0.9643	1			'H3K27ac_10-12D_M4_TGACCA_trimmed_mapped.bam'	0.9224	0.9031	0.9236	1			'H3K27ac_elav_M4_TGACCA_trimmed_mapped.bam'	0.9795	0.9549	0.9841	1
Average correlation	0.95915		Median correlation	0.9628			Average correlation	0.9582		Median correlation	0.95825			Average correlation	0.925167		Median correlation	0.923			Average correlation	0.966683		Median correlation	0.96925
	H3K27me3 fru P1							H3K27me3 fru P1							H3K27me3 fru P1							H3K27me3 elav
	'H3K27me3_48P_M1_GATCAG_trimmed_mapped.bam'	'H3K27me3_48P_M2_TAGCTT_trimmed_mapped.bam'	'H3K27me3_48P_M3_GGCTAC_trimmed_mapped.bam'	'H3K27me3_48P_M4_CTTGTA_trimmed_mapped.bam'				H3K27me3_1d_M1_GATCAG_trimmed_mapped.bam'	H3K27me3_1d_M2_TAGCTT_trimmed_mapped.bam'	H3K27me3_1d_M3_GGCTAC_trimmed_mapped.bam'	H3K27me3_1d_M4_CTTGTA_trimmed_mapped.bam'				'H3K27me3_10-12D_M1_GATCAG_trimmed_mapped.bam'	'H3K27me3_10-12D_M2_TAGCTT_trimmed_mapped.bam'	'H3K27me3_10-12D_M3_GGCTAC_trimmed_mapped.bam'	'H3K27me3_10-12D_M4_CTTGTA_trimmed_mapped.bam'				'H3K27me3_elav_M1_GATCAG_trimmed_mapped.bam'	'H3K27me3_elav_M2_TAGCTT_trimmed_mapped.bam'	'H3K27me3_elav_M3_GGCTAC_trimmed_mapped.bam'	'H3K27me3_elav_M4_CTTGTA_trimmed_mapped.bam'
'H3K27me3_48P_M1_GATCAG_trimmed_mapped.bam'	1	0.9554	0.9599	0.9666			H3K27me3_1d_M1_GATCAG_trimmed_mapped.bam'	1	0.9489	0.902	0.8934			'H3K27me3_10-12D_M1_GATCAG_trimmed_mapped.bam'	1	0.9717	0.9538	0.9665			'H3K27me3_elav_M1_GATCAG_trimmed_mapped.bam'	1	0.9822	0.9804	0.9792
'H3K27me3_48P_M2_TAGCTT_trimmed_mapped.bam'	0.9554	1	0.9413	0.9525			H3K27me3_1d_M2_TAGCTT_trimmed_mapped.bam'	0.9489	1	0.9515	0.948			'H3K27me3_10-12D_M2_TAGCTT_trimmed_mapped.bam'	0.9717	1	0.9662	0.9688			'H3K27me3_elav_M2_TAGCTT_trimmed_mapped.bam'	0.9822	1	0.9758	0.9779
'H3K27me3_48P_M3_GGCTAC_trimmed_mapped.bam'	0.9599	0.9413	1	0.9588			H3K27me3_1d_M3_GGCTAC_trimmed_mapped.bam'	0.902	0.9515	1	0.9686			'H3K27me3_10-12D_M3_GGCTAC_trimmed_mapped.bam'	0.9538	0.9662	1	0.9633			'H3K27me3_elav_M3_GGCTAC_trimmed_mapped.bam'	0.9804	0.9758	1	0.9737
'H3K27me3_48P_M4_CTTGTA_trimmed_mapped.bam'	0.9666	0.9525	0.9588	1			H3K27me3_1d_M4_CTTGTA_trimmed_mapped.bam'	0.8934	0.948	0.9686	1			'H3K27me3_10-12D_M4_CTTGTA_trimmed_mapped.bam'	0.9665	0.9688	0.9633	1			'H3K27me3_elav_M4_CTTGTA_trimmed_mapped.bam'	0.9792	0.9779	0.9737	1
Average correlation	0.95575		Median correlation	0.9571			Average correlation	0.9354		Median correlation	0.94845			Average correlation	0.96505		Median correlation	0.96635			Average correlation	0.9782		Median correlation	0.97855
	H3K36me3 fru P1							H3K36me3 fru P1							H3K36me3 fru P1							H3K36me3 elav
	'H3K36me3_48P_M1_GTCCGC_trimmed_mapped.bam'	'H3K36me3_48P_M2_GTGAAA_trimmed_mapped.bam'	'H3K36me3_48P_M3_GTGGCC_trimmed_mapped.bam'	'H3K36me3_48P_M4_GTTTCG_trimmed_mapped.bam'				H3K36me3_1d_M1_ATCACG_trimmed_mapped.bam'	H3K36me3_1d_M2_CGATGT_trimmed_mapped.bam'	H3K36me3_1d_M3_TTAGGC_trimmed_mapped.bam'	H3K36me3_1d_M4_TGACCA_trimmed_mapped.bam'				'H3K36me3_10-12D_M1_GATCAG_trimmed_mapped.bam'	'H3K36me3_10-12D_M2_TAGCTT_trimmed_mapped.bam'	'H3K36me3_10-12D_M3_GGCTAC_trimmed_mapped.bam'	'H3K36me3_10-12D_M4_CTTGTA_trimmed_mapped.bam'				'H3K36me3_elav_M1_GTCCGC_trimmed_mapped.bam'	'H3K36me3_elav_M2_GTGAAA_trimmed_mapped.bam'	'H3K36me3_elav_M3_GTGGCC_trimmed_mapped.bam'	'H3K36me3_elav_M4_GTTTCG_trimmed_mapped.bam'
'H3K36me3_48P_M1_GTCCGC_trimmed_mapped.bam'	1	0.9878	0.9686	0.9813			H3K36me3_1d_M1_ATCACG_trimmed_mapped.bam'	1	0.962	0.9422	0.9195			'H3K36me3_10-12D_M1_GATCAG_trimmed_mapped.bam'	1	0.9778	0.9812	0.9762			'H3K36me3_elav_M1_GTCCGC_trimmed_mapped.bam'	1	0.9816	0.9523	0.9771
'H3K36me3_48P_M2_GTGAAA_trimmed_mapped.bam'	0.9878	1	0.9664	0.979			H3K36me3_1d_M2_CGATGT_trimmed_mapped.bam'	0.962	1	0.9592	0.9439			'H3K36me3_10-12D_M2_TAGCTT_trimmed_mapped.bam'	0.9778	1	0.9659	0.9566			'H3K36me3_elav_M2_GTGAAA_trimmed_mapped.bam'	0.9816	1	0.9339	0.9726
'H3K36me3_48P_M3_GTGGCC_trimmed_mapped.bam'	0.9686	0.9664	1	0.9828			H3K36me3_1d_M3_TTAGGC_trimmed_mapped.bam'	0.9422	0.9592	1	0.9575			'H3K36me3_10-12D_M3_GGCTAC_trimmed_mapped.bam'	0.9812	0.9659	1	0.983			'H3K36me3_elav_M3_GTGGCC_trimmed_mapped.bam'	0.9523	0.9339	1	0.9562
'H3K36me3_48P_M4_GTTTCG_trimmed_mapped.bam'	0.9813	0.979	0.9828	1			H3K36me3_1d_M4_TGACCA_trimmed_mapped.bam'	0.9195	0.9439	0.9575	1			'H3K36me3_10-12D_M4_CTTGTA_trimmed_mapped.bam'	0.9762	0.9566	0.983	1			'H3K36me3_elav_M4_GTTTCG_trimmed_mapped.bam'	0.9771	0.9726	0.9562	1
Average correlation	0.97765		Median correlation	0.98015			Average correlation	0.947383		Median correlation	0.9507			Average correlation	0.97345		Median correlation	0.977			Average correlation	0.962283		Median correlation	0.9644
	H3K4me3 fru P1							H3K4me3 fru P1							H3K4me3 fru P1							H3K4me3 elav
	'H3K4me3_48P_M1_GATCAG_trimmed_mapped.bam'	'H3K4me3_48P_M2_TAGCTT_trimmed_mapped.bam'	'H3K4me3_48P_M3_GGCTAC_trimmed_mapped.bam'	'H3K4me3_48P_M4_CTTGTA_trimmed_mapped.bam'				H3K4me3_1d_M1_GATCAG_trimmed_mapped.bam'	H3K4me3_1d_M2_TAGCTT_trimmed_mapped.bam'	H3K4me3_1d_M3_GGCTAC_trimmed_mapped.bam'	H3K4me3_1d_M4_CTTGTA_trimmed_mapped.bam'				'H3K4me3_10-12D_M1_GATCAG_trimmed_mapped.bam'	'H3K4me3_10-12D_M2_TAGCTT_trimmed_mapped.bam'	'H3K4me3_10-12D_M3_GGCTAC_trimmed_mapped.bam'	'H3K4me3_10-12D_M4_CTTGTA_trimmed_mapped.bam'				'H3K4me3_elav_M1_GATCAG_trimmed_mapped.bam'	'H3K4me3_elav_M2_TAGCTT_trimmed_mapped.bam'	'H3K4me3_elav_M3_GGCTAC_trimmed_mapped.bam'	'H3K4me3_elav_M4_CTTGTA_trimmed_mapped.bam'
'H3K4me3_48P_M1_GATCAG_trimmed_mapped.bam'	1	0.9815	0.9573	0.981			H3K4me3_1d_M1_GATCAG_trimmed_mapped.bam'	1	0.9751	0.9423	0.9416			'H3K4me3_10-12D_M1_GATCAG_trimmed_mapped.bam'	1	0.9591	0.9588	0.96			'H3K4me3_elav_M1_GATCAG_trimmed_mapped.bam'	1	0.9742	0.9638	0.9665
'H3K4me3_48P_M2_TAGCTT_trimmed_mapped.bam'	0.9815	1	0.95	0.9832			H3K4me3_1d_M2_TAGCTT_trimmed_mapped.bam'	0.9751	1	0.9516	0.9497			'H3K4me3_10-12D_M2_TAGCTT_trimmed_mapped.bam'	0.9591	1	0.9507	0.9522			'H3K4me3_elav_M2_TAGCTT_trimmed_mapped.bam'	0.9742	1	0.9597	0.9621
'H3K4me3_48P_M3_GGCTAC_trimmed_mapped.bam'	0.9573	0.95	1	0.9503			H3K4me3_1d_M3_GGCTAC_trimmed_mapped.bam'	0.9423	0.9516	1	0.9707			'H3K4me3_10-12D_M3_GGCTAC_trimmed_mapped.bam'	0.9588	0.9507	1	0.9617			'H3K4me3_elav_M3_GGCTAC_trimmed_mapped.bam'	0.9638	0.9597	1	0.9752
'H3K4me3_48P_M4_CTTGTA_trimmed_mapped.bam'	0.981	0.9832	0.9503	1			H3K4me3_1d_M4_CTTGTA_trimmed_mapped.bam'	0.9416	0.9497	0.9707	1			'H3K4me3_10-12D_M4_CTTGTA_trimmed_mapped.bam'	0.96	0.9522	0.9617	1			'H3K4me3_elav_M4_CTTGTA_trimmed_mapped.bam'	0.9665	0.9621	0.9752	1
Average correlation	0.967217		Median correlation	0.96915			Average correlation	0.955167		Median correlation	0.95065			Average correlation	0.957083		Median correlation	0.95895			Average correlation	0.966917		Median correlation	0.96515
	H3K9me3 fru P1							H3K9me3 fru P1							H3K9me3 fru P1							H3K9me3 elav
	'H3K9me3_48P_M1_GTCCGC_trimmed_mapped.bam'	'H3K9me3_48P_M2_GTGAAA_trimmed_mapped.bam'	'H3K9me3_48P_M3_GTGGCC_trimmed_mapped.bam'	'H3K9me3_48P_M4_GTTTCG_trimmed_mapped.bam'				H3K9me3_1d_M1_GTCCGC_trimmed_mapped.bam'	H3K9me3_1d_M2_GTGAAA_trimmed_mapped.bam'	H3K9me3_1d_M3_GTGGCC_trimmed_mapped.bam'	H3K9me3_1d_M4_GTTTCG_trimmed_mapped.bam'				'H3K9me3_10-12D_M1_GTCCGC_trimmed_mapped.bam'	'H3K9me3_10-12D_M2_GTGAAA_trimmed_mapped.bam'	'H3K9me3_10-12D_M3_GTGGCC_trimmed_mapped.bam'	'H3K9me3_10-12D_M4_GTTTCG_trimmed_mapped.bam'				'H3K9me3_elav_M1_GTCCGC_trimmed_mapped.bam'	'H3K9me3_elav_M2_GTGAAA_trimmed_mapped.bam'	'H3K9me3_elav_M3_GTGGCC_trimmed_mapped.bam'	'H3K9me3_elav_M4_GTTTCG_trimmed_mapped.bam'
'H3K9me3_48P_M1_GTCCGC_trimmed_mapped.bam'	1	0.961	0.9489	0.9575			H3K9me3_1d_M1_GTCCGC_trimmed_mapped.bam'	1	0.9653	0.957	0.9623			'H3K9me3_10-12D_M1_GTCCGC_trimmed_mapped.bam'	1	0.9471	0.95	0.9434			'H3K9me3_elav_M1_GTCCGC_trimmed_mapped.bam'	1	0.9587	0.9418	0.9513
'H3K9me3_48P_M2_GTGAAA_trimmed_mapped.bam'	0.961	1	0.9464	0.9473			H3K9me3_1d_M2_GTGAAA_trimmed_mapped.bam'	0.9653	1	0.964	0.9618			'H3K9me3_10-12D_M2_GTGAAA_trimmed_mapped.bam'	0.9471	1	0.974	0.9695			'H3K9me3_elav_M2_GTGAAA_trimmed_mapped.bam'	0.9587	1	0.964	0.9473
'H3K9me3_48P_M3_GTGGCC_trimmed_mapped.bam'	0.9489	0.9464	1	0.941			H3K9me3_1d_M3_GTGGCC_trimmed_mapped.bam'	0.957	0.964	1	0.9588			'H3K9me3_10-12D_M3_GTGGCC_trimmed_mapped.bam'	0.95	0.974	1	0.9717			'H3K9me3_elav_M3_GTGGCC_trimmed_mapped.bam'	0.9418	0.964	1	0.9355
'H3K9me3_48P_M4_GTTTCG_trimmed_mapped.bam'	0.9575	0.9473	0.941	1			H3K9me3_1d_M4_GTTTCG_trimmed_mapped.bam'	0.9623	0.9618	0.9588	1			'H3K9me3_10-12D_M4_GTTTCG_trimmed_mapped.bam'	0.9434	0.9695	0.9717	1			'H3K9me3_elav_M4_GTTTCG_trimmed_mapped.bam'	0.9513	0.9473	0.9355	1
Average correlation	0.95035		Median correlation	0.9481			Average correlation	0.961533		Median correlation	0.96205			Average correlation	0.959283		Median correlation	0.95975			Average correlation	0.949767		Median correlation	0.9493
	Female 48hr APF							Female 1-day adult							Female 10-12 day adult							Female 1-day elav
	'Input_F1_ACAGTG_mapped_48h_pupae.bam'	'Input_F2_GCCAAT_mapped_48h_pupae.bam'	'Input_F3_CAGATC_mapped_48h_pupae.bam'	'Input_F4_ACTTGA_mapped_48h_pupae.bam'				Input_F1_ACAGTG_trimmed_mapped_1d_adult.bam'	Input_F2_GCCAAT_trimmed_mapped_1d_adult.bam'	Input_F3_CAGATC_trimmed_mapped_1d_adult.bam'	Input_F4_ACTTGA_trimmed_mapped_1d_adult.bam'				'Input_F1_ACAGTG_mapped_10_12d_adult.bam'	'Input_F3_CAGATC_mapped10_12d_adult.bam'	'Input_F4_ACTTGA_mapped_10_12d_adult.bam'					Input_F1_ACAGTG_mapped_elav_1d_adult.bam'	Input_F2_GCCAAT_mapped_elav_1d_adult.bam'	Input_F3_CAGATC_mapped_elav_1d_adult.bam'	Input_F4_ACTTGA_mapped_elav_1d_adult.bam'
'Input_F1_ACAGTG_mapped_48h_pupae.bam'	1	0.9776	0.9836	0.8063			Input_F1_ACAGTG_trimmed_mapped_1d_adult.bam'	1	0.9809	0.9851	0.9851			'Input_F1_ACAGTG_mapped_10_12d_adult.bam'	1	0.98	0.9834				Input_F1_ACAGTG_mapped_elav_1d_adult.bam'	1	0.9817	0.9787	0.9805
'Input_F2_GCCAAT_mapped_48h_pupae.bam'	0.9776	1	0.9772	0.8026			Input_F2_GCCAAT_trimmed_mapped_1d_adult.bam'	0.9809	1	0.9785	0.9804			'Input_F3_CAGATC_mapped10_12d_adult.bam'	0.98	1	0.9849				Input_F2_GCCAAT_mapped_elav_1d_adult.bam'	0.9817	1	0.9824	0.9823
'Input_F3_CAGATC_mapped_48h_pupae.bam'	0.9836	0.9772	1	0.806			Input_F3_CAGATC_trimmed_mapped_1d_adult.bam'	0.9851	0.9785	1	0.9842			'Input_F4_ACTTGA_mapped_10_12d_adult.bam'	0.9834	0.9849	1				Input_F3_CAGATC_mapped_elav_1d_adult.bam'	0.9787	0.9824	1	0.9808
'Input_F4_ACTTGA_mapped_48h_pupae.bam'	0.8063	0.8026	0.806	1			Input_F4_ACTTGA_trimmed_mapped_1d_adult.bam'	0.9851	0.9804	0.9842	1			Average correlation	0.982767		Median correlation	0.9834			Input_F4_ACTTGA_mapped_elav_1d_adult.bam'	0.9805	0.9823	0.9808	1
Average correlation	0.892217		Median correlation	0.89175			Average correlation	0.982367		Median correlation	0.98255				H3K27ac fru P1						Average correlation	0.981067		Median correlation	0.98125
	H3K27ac fru P1							H3K27ac fru P1							'H3K27ac_10-12D_F1_ACAGTG_trimmed_mapped.bam'	'H3K27ac_10-12D_F3_CAGATC_trimmed_mapped.bam'	'H3K27ac_10-12D_F4_ACTTGA_trimmed_mapped.bam'					H3K27ac elav
	'H3K27ac_48P_F1_ACAGTG_trimmed_mapped.bam'	'H3K27ac_48P_F2_GCCAAT_trimmed_mapped.bam'	'H3K27ac_48P_F3_CAGATC_trimmed_mapped.bam'	'H3K27ac_48P_F4_ACTTGA_trimmed_mapped.bam'				H3K27ac_1d_F1_ACAGTG_trimmed_mapped.bam'	H3K27ac_1d_F2_GCCAAT_trimmed_mapped.bam'	H3K27ac_1d_F3_CAGATC_trimmed_mapped.bam'	H3K27ac_1d_F4_ACTTGA_trimmed_mapped.bam'			'H3K27ac_10-12D_F1_ACAGTG_trimmed_mapped.bam'	1	0.908	0.9105					'H3K27ac_elav_F1_ACAGTG_trimmed_mapped.bam'	'H3K27ac_elav_F2_GCCAAT_trimmed_mapped.bam'	'H3K27ac_elav_F4_ACTTGA_trimmed_mapped.bam'
'H3K27ac_48P_F1_ACAGTG_trimmed_mapped.bam'	1	0.9634	0.9589	0.9567			H3K27ac_1d_F1_ACAGTG_trimmed_mapped.bam'	1	0.9289	0.9424	0.9449			'H3K27ac_10-12D_F3_CAGATC_trimmed_mapped.bam'	0.908	1	0.9557				'H3K27ac_elav_F1_ACAGTG_trimmed_mapped.bam'	1	0.9587	0.9506
'H3K27ac_48P_F2_GCCAAT_trimmed_mapped.bam'	0.9634	1	0.9673	0.9676			H3K27ac_1d_F2_GCCAAT_trimmed_mapped.bam'	0.9289	1	0.9289	0.9421			'H3K27ac_10-12D_F4_ACTTGA_trimmed_mapped.bam'	0.9105	0.9557	1				'H3K27ac_elav_F2_GCCAAT_trimmed_mapped.bam'	0.9587	1	0.9531
'H3K27ac_48P_F3_CAGATC_trimmed_mapped.bam'	0.9589	0.9673	1	0.9716			H3K27ac_1d_F3_CAGATC_trimmed_mapped.bam'	0.9424	0.9289	1	0.9539			Average correlation	0.924733		Median correlation	0.9105			'H3K27ac_elav_F4_ACTTGA_trimmed_mapped.bam'	0.9506	0.9531	1
'H3K27ac_48P_F4_ACTTGA_trimmed_mapped.bam'	0.9567	0.9676	0.9716	1			H3K27ac_1d_F4_ACTTGA_trimmed_mapped.bam'	0.9449	0.9421	0.9539	1				H3K27me3 fru P1						Average correlation	0.954133		Median correlation	0.9531
Average correlation	0.96425		Median correlation	0.96535			Average correlation	0.940183		Median correlation	0.94225				'H3K27me3_10-12D_F1_AGTCAA_trimmed_mapped.bam'	'H3K27me3_10-12D_F3_ATGTCA_trimmed_mapped.bam'	'H3K27me3_10-12D_F4_CCGTCC_trimmed_mapped.bam'					H3K27me3 elav
	H3K27me3 fru P1							H3K27me3 fru P1						'H3K27me3_10-12D_F1_AGTCAA_trimmed_mapped.bam'	1	0.8621	0.9422					'H3K27me3_elav_F1_AGTCAA_trimmed_mapped.bam'	'H3K27me3_elav_F2_AGTTCC_trimmed_mapped.bam'	'H3K27me3_elav_F3_ATGTCA_trimmed_mapped.bam'	'H3K27me3_elav_F4_CCGTCC_trimmed_mapped.bam'
	'H3K27me3_48P_F1_AGTCAA_trimmed_mapped.bam'	'H3K27me3_48P_F2_AGTTCC_trimmed_mapped.bam'	'H3K27me3_48P_F3_ATGTCA_trimmed_mapped.bam'	'H3K27me3_48P_F4_CCGTCC_trimmed_mapped.bam'				H3K27me3_1d_F1_AGTCAA_trimmed_mapped.bam'	H3K27me3_1d_F2_AGTTCC_trimmed_mapped.bam'	H3K27me3_1d_F3_ATGTCA_trimmed_mapped.bam'	H3K27me3_1d_F4_CCGTCC_trimmed_mapped.bam'			'H3K27me3_10-12D_F3_ATGTCA_trimmed_mapped.bam'	0.8621	1	0.9127				'H3K27me3_elav_F1_AGTCAA_trimmed_mapped.bam'	1	0.9627	0.9648	0.9476
'H3K27me3_48P_F1_AGTCAA_trimmed_mapped.bam'	1	0.876	0.9559	0.9499			H3K27me3_1d_F1_AGTCAA_trimmed_mapped.bam'	1	0.9203	0.9501	0.964			'H3K27me3_10-12D_F4_CCGTCC_trimmed_mapped.bam'	0.9422	0.9127	1				'H3K27me3_elav_F2_AGTTCC_trimmed_mapped.bam'	0.9627	1	0.9577	0.9311
'H3K27me3_48P_F2_AGTTCC_trimmed_mapped.bam'	0.876	1	0.8944	0.8978			H3K27me3_1d_F2_AGTTCC_trimmed_mapped.bam'	0.9203	1	0.9481	0.9164			Average correlation	0.905667		Median correlation	0.9127			'H3K27me3_elav_F3_ATGTCA_trimmed_mapped.bam'	0.9648	0.9577	1	0.958
'H3K27me3_48P_F3_ATGTCA_trimmed_mapped.bam'	0.9559	0.8944	1	0.9554			H3K27me3_1d_F3_ATGTCA_trimmed_mapped.bam'	0.9501	0.9481	1	0.9522				H3K36me3 fru P1						'H3K27me3_elav_F4_CCGTCC_trimmed_mapped.bam'	0.9476	0.9311	0.958	1
'H3K27me3_48P_F4_CCGTCC_trimmed_mapped.bam'	0.9499	0.8978	0.9554	1			H3K27me3_1d_F4_CCGTCC_trimmed_mapped.bam'	0.964	0.9164	0.9522	1				'H3K36me3_10-12D_F1_AGTCAA_trimmed_mapped.bam'	'H3K36me3_10-12D_F3_ATGTCA_trimmed_mapped.bam'	'H3K36me3_10-12D_F4_CCGTCC_trimmed_mapped.bam'				Average correlation	0.95365		Median correlation	0.95785
Average correlation	0.921567		Median correlation	0.92385			Average correlation	0.94185		Median correlation	0.9491			'H3K36me3_10-12D_F1_AGTCAA_trimmed_mapped.bam'	1	0.9489	0.9484					H3K36me3 elav
	H3K36me3 fru P1							H3K36me3 fru P1						'H3K36me3_10-12D_F3_ATGTCA_trimmed_mapped.bam'	0.9489	1	0.9693					'H3K36me3_elav_F1_CGTACG_trimmed_mapped.bam'	'H3K36me3_elav_F2_GAGTGG_trimmed_mapped.bam'	'H3K36me3_elav_F3_ACTGAT_trimmed_mapped.bam'	'H3K36me3_elav_F4_ATTCCT_trimmed_mapped.bam'
	'H3K36me3_48P_F1_CGTACG_trimmed_mapped.bam'	'H3K36me3_48P_F2_GAGTGG_trimmed_mapped.bam'	'H3K36me3_48P_F3_ACTGAT_trimmed_mapped.bam'	'H3K36me3_48P_F4_ATTCCT_trimmed_mapped.bam'				H3K36me3_1d_F1_ACAGTG_trimmed_mapped.bam'	H3K36me3_1d_F2_GCCAAT_trimmed_mapped.bam'	H3K36me3_1d_F3_CAGATC_trimmed_mapped.bam'	H3K36me3_1d_F4_ACTTGA_trimmed_mapped.bam'			'H3K36me3_10-12D_F4_CCGTCC_trimmed_mapped.bam'	0.9484	0.9693	1				'H3K36me3_elav_F1_CGTACG_trimmed_mapped.bam'	1	0.9792	0.979	0.9608
'H3K36me3_48P_F1_CGTACG_trimmed_mapped.bam'	1	0.9518	0.9793	0.9478			H3K36me3_1d_F1_ACAGTG_trimmed_mapped.bam'	1	0.9334	0.9465	0.9459			Average correlation	0.955533		Median correlation	0.9489			'H3K36me3_elav_F2_GAGTGG_trimmed_mapped.bam'	0.9792	1	0.9747	0.9521
'H3K36me3_48P_F2_GAGTGG_trimmed_mapped.bam'	0.9518	1	0.9627	0.9559			H3K36me3_1d_F2_GCCAAT_trimmed_mapped.bam'	0.9334	1	0.9255	0.9623				H3K4me3 fru P1						'H3K36me3_elav_F3_ACTGAT_trimmed_mapped.bam'	0.979	0.9747	1	0.9724
'H3K36me3_48P_F3_ACTGAT_trimmed_mapped.bam'	0.9793	0.9627	1	0.9649			H3K36me3_1d_F3_CAGATC_trimmed_mapped.bam'	0.9465	0.9255	1	0.9467				'H3K4me3_10-12D_F1_AGTCAA_trimmed_mapped.bam'	'H3K4me3_10-12D_F3_ATGTCA_trimmed_mapped.bam'	'H3K4me3_10-12D_F4_CCGTCC_trimmed_mapped.bam'				'H3K36me3_elav_F4_ATTCCT_trimmed_mapped.bam'	0.9608	0.9521	0.9724	1
'H3K36me3_48P_F4_ATTCCT_trimmed_mapped.bam'	0.9478	0.9559	0.9649	1			H3K36me3_1d_F4_ACTTGA_trimmed_mapped.bam'	0.9459	0.9623	0.9467	1			'H3K4me3_10-12D_F1_AGTCAA_trimmed_mapped.bam'	1	0.9432	0.9415				Average correlation	0.9697		Median correlation	0.97355
Average correlation	0.9604		Median correlation	0.9593			Average correlation	0.943383		Median correlation	0.9462			'H3K4me3_10-12D_F3_ATGTCA_trimmed_mapped.bam'	0.9432	1	0.9519					H3K4me3 elav
	H3K4me3 fru P1							H3K4me3 fru P1						'H3K4me3_10-12D_F4_CCGTCC_trimmed_mapped.bam'	0.9415	0.9519	1					'H3K4me3_elav_F1_AGTCAA_trimmed_mapped.bam'	'H3K4me3_elav_F2_AGTTCC_trimmed_mapped.bam'	'H3K4me3_elav_F3_ATGTCA_trimmed_mapped.bam'	'H3K4me3_elav_F4_CCGTCC_trimmed_mapped.bam'
	'H3K4me3_48P_F1_AGTCAA_trimmed_mapped.bam'	'H3K4me3_48P_F2_AGTTCC_trimmed_mapped.bam'	'H3K4me3_48P_F3_ATGTCA_trimmed_mapped.bam'	'H3K4me3_48P_F4_CCGTCC_trimmed_mapped.bam'				H3K4me3_1d_F1_AGTCAA_trimmed_mapped.bam'	H3K4me3_1d_F2_AGTTCC_trimmed_mapped.bam'	H3K4me3_1d_F3_ATGTCA_trimmed_mapped.bam'	H3K4me3_1d_F4_CCGTCC_trimmed_mapped.bam'			Average correlation	0.945533		Median correlation	0.9432			'H3K4me3_elav_F1_AGTCAA_trimmed_mapped.bam'	1	0.9545	0.8983	0.9401
'H3K4me3_48P_F1_AGTCAA_trimmed_mapped.bam'	1	0.9608	0.9519	0.9691			H3K4me3_1d_F1_AGTCAA_trimmed_mapped.bam'	1	0.9477	0.9539	0.9539				H3K9me3 fru P1						'H3K4me3_elav_F2_AGTTCC_trimmed_mapped.bam'	0.9545	1	0.9045	0.946
'H3K4me3_48P_F2_AGTTCC_trimmed_mapped.bam'	0.9608	1	0.9545	0.9611			H3K4me3_1d_F2_AGTTCC_trimmed_mapped.bam'	0.9477	1	0.9493	0.9504				'H3K9me3_10-12D_F1_CGTACG_trimmed_mapped.bam'	'H3K9me3_10-12D_F3_ACTGAT_trimmed_mapped.bam'	'H3K9me3_10-12D_F4_ATTCCT_trimmed_mapped.bam'				'H3K4me3_elav_F3_ATGTCA_trimmed_mapped.bam'	0.8983	0.9045	1	0.905
'H3K4me3_48P_F3_ATGTCA_trimmed_mapped.bam'	0.9519	0.9545	1	0.9683			H3K4me3_1d_F3_ATGTCA_trimmed_mapped.bam'	0.9539	0.9493	1	0.9663			'H3K9me3_10-12D_F1_CGTACG_trimmed_mapped.bam'	1	0.9433	0.9451				'H3K4me3_elav_F4_CCGTCC_trimmed_mapped.bam'	0.9401	0.946	0.905	1
'H3K4me3_48P_F4_CCGTCC_trimmed_mapped.bam'	0.9691	0.9611	0.9683	1			H3K4me3_1d_F4_CCGTCC_trimmed_mapped.bam'	0.9539	0.9504	0.9663	1			'H3K9me3_10-12D_F3_ACTGAT_trimmed_mapped.bam'	0.9433	1	0.9307				Average correlation	0.924733		Median correlation	0.92255
Average correlation	0.96095		Median correlation	0.96095			Average correlation	0.953583		Median correlation	0.95215			'H3K9me3_10-12D_F4_ATTCCT_trimmed_mapped.bam'	0.9451	0.9307	1					H3K9me3 elav
	H3K9me3 fru P1							H3K9me3 fru P1						Average correlation	0.9397		Median correlation	0.9433				'H3K9me3_elav_F1_CGTACG_trimmed_mapped.bam'	'H3K9me3_elav_F2_GAGTGG_trimmed_mapped.bam'	'H3K9me3_elav_F3_ACTGAT_trimmed_mapped.bam'	'H3K9me3_elav_F4_ATTCCT_trimmed_mapped.bam'
	'H3K9me3_48P_F1_CGTACG_trimmed_mapped.bam'	'H3K9me3_48P_F2_GAGTGG_trimmed_mapped.bam'	'H3K9me3_48P_F3_ACTGAT_trimmed_mapped.bam'	'H3K9me3_48P_F4_ATTCCT_trimmed_mapped.bam'				H3K9me3_1d_F1_CGTACG_trimmed_mapped.bam'	H3K9me3_1d_F2_GAGTGG_trimmed_mapped.bam'	H3K9me3_1d_F3_ACTGAT_trimmed_mapped.bam'	H3K9me3_1d_F4_ATTCCT_trimmed_mapped.bam'										'H3K9me3_elav_F1_CGTACG_trimmed_mapped.bam'	1	0.9003	0.912	0.9423
'H3K9me3_48P_F1_CGTACG_trimmed_mapped.bam'	1	0.9192	0.9244	0.937			H3K9me3_1d_F1_CGTACG_trimmed_mapped.bam'	1	0.9498	0.963	0.9499										'H3K9me3_elav_F2_GAGTGG_trimmed_mapped.bam'	0.9003	1	0.9111	0.908
'H3K9me3_48P_F2_GAGTGG_trimmed_mapped.bam'	0.9192	1	0.9152	0.9204			H3K9me3_1d_F2_GAGTGG_trimmed_mapped.bam'	0.9498	1	0.9539	0.9355										'H3K9me3_elav_F3_ACTGAT_trimmed_mapped.bam'	0.912	0.9111	1	0.9304
'H3K9me3_48P_F3_ACTGAT_trimmed_mapped.bam'	0.9244	0.9152	1	0.9194			H3K9me3_1d_F3_ACTGAT_trimmed_mapped.bam'	0.963	0.9539	1	0.9436										'H3K9me3_elav_F4_ATTCCT_trimmed_mapped.bam'	0.9423	0.908	0.9304	1
'H3K9me3_48P_F4_ATTCCT_trimmed_mapped.bam'	0.937	0.9204	0.9194	1			H3K9me3_1d_F4_ATTCCT_trimmed_mapped.bam'	0.9499	0.9355	0.9436	1										Average correlation	0.91735		Median correlation	0.91155
Average correlation	0.9226		Median correlation	0.9199			Average correlation	0.949283		Median correlation	0.94985

## Sheet: 2.Sequencing coverage
Sequencing coverage (percent coverage of each chromosome)
Histone H3
Chromosome	Male 48hr APF	Male 1-day adult	Male 10-12 day adult	Male 1-day elav	Female 48hr APF	Female 1-day adult	Female 10-12 day adult	Female 1-day elav
chr2L	90.9	91.2	91.1	89.5	90.5	91	91.1	89.9
chr2R	82.3	82.9	82.7	81	82	82.7	82.6	81.3
chr3L	84.3	84.8	84.6	82.7	83.8	84.6	84.7	83.1
chr3R	87.3	87.8	87.7	86.2	87	87.7	87.7	86.5
chr4	81.9	83	82.6	77.7	80.7	82.4	82.8	78.5
chrX	86.8	80.4	87.2	83.2	87.8	88.3	88.4	87.3
H3K27ac
Chromosome	Male 48hr APF	Male 1-day adult	Male 10-12 day adult	Male 1-day elav	Female 48hr APF	Female 1-day adult	Female 10-12 day adult	Female 1-day elav
chr2L	88	98.5	90.7	89.4	95.6	89.9	99.3	88
chr2R	79.3	98.7	81.7	80.4	95.2	81.2	99.3	79
chr3L	80.9	98.2	84	82.4	94.4	83.2	99	80.8
chr3R	84.4	98.8	87	85.7	95.2	86.5	99.7	84.2
chr4	75.3	95.5	82.2	76.1	88.2	79.7	97.3	71.7
chrX	80.8	95.1	84.7	82.4	95.3	87.3	98.8	85.3
H3K27me3
Chromosome	Male 48hr APF	Male 1-day adult	Male 10-12 day adult	Male 1-day elav	Female 48hr APF	Female 1-day adult	Female 10-12 day adult	Female 1-day elav
chr2L	89.4	90	90.2	89.1	88.8	89.7	90	88.4
chr2R	80.5	81.4	81.5	80.2	79.9	81.2	81.4	79.4
chr3L	82.4	83.3	83.5	82.2	81.8	83	83.3	81.4
chr3R	85.5	86.7	86.8	85.7	85	86.4	86.6	85
chr4	78.5	80.2	80.5	77.7	77.5	79.5	79.9	75.8
chrX	83.3	84	83.7	78.1	86.3	87.1	87.2	85.5
H3K36me3
Chromosome	Male 48hr APF	Male 1-day adult	Male 10-12 day adult	Male 1-day elav	Female 48hr APF	Female 1-day adult	Female 10-12 day adult	Female 1-day elav
chr2L	86.9	88.7	87.4	94.1	87.5	88.7	88.4	95.7
chr2R	78.5	80.3	79.2	94.9	78.9	80.2	80	96.2
chr3L	79.8	81.9	80.5	93.6	80.4	81.9	81.6	95.2
chr3R	83.4	85.5	84.3	95.1	83.9	85.5	85.2	96.4
chr4	74.2	78.4	75.7	91.1	75.6	77.2	78.8	92.4
chrX	79.5	80.9	78.1	82.1	85.1	86.1	85.6	95.3
H3K4me3
Chromosome	Male 48hr APF	Male 1-day adult	Male 10-12 day adult	Male 1-day elav	Female 48hr APF	Female 1-day adult	Female 10-12 day adult	Female 1-day elav
chr2L	88.5	88.9	89	89	84.9	88.3	88.3	89.5
chr2R	79.8	80.5	80.5	80.2	76.9	80	80	80.7
chr3L	81.4	82.2	82.2	82.1	77.9	81.6	81.5	82.6
chr3R	84.9	85.7	85.7	85.6	81.8	85.2	85.1	86
chr4	76.8	78	77.9	76.9	69.2	75.7	76.3	77.6
chrX	81.6	81.9	81.2	79.6	82.8	85.8	85.6	86.8
H3K9me3
Chromosome	Male 48hr APF	Male 1-day adult	Male 10-12 day adult	Male 1-day elav	Female 48hr APF	Female 1-day adult	Female 10-12 day adult	Female 1-day elav
chr2L	89.7	88.6	89.2	87.1	89.5	88.4	89.6	87.2
chr2R	80.9	80.3	80.7	78.7	80.8	80	81.1	78.8
chr3L	82.8	81.9	82.4	80.4	82.6	81.7	83	80.5
chr3R	86	85.5	85.9	84	85.8	85.3	86.3	84
chr4	79.9	76.7	78	77.2	79.6	75.5	79.3	77.6
chrX	83.5	80.6	81.8	73	86.9	85.8	86.9	84.5

## Sheet: 3.MACS2 peak count summary
Number of total raw, annotated MACS2 peak counts and number of genes containing an annotated MACS2 peak for each modification, sex, and stage
Number of raw peaks for each chromatin modification per condition
	Male 48hr APF fru	Male 1-day Adult fru	Male 10-12 day Adult fru	Male 1-day Adult elav	Female 48hr APF fru	Female 1-day Adult fru	Female 10-12 day Adult fru	Female 1-day Adult elav
H3K27ac	6986	1509	15714	21532	11223	1488	11433	13233
H3K27me3	17688	17549	14089	13327	22006	22263	17885	14588
H3K36me3	22273	18050	17340	10695	22601	26377	9539	8108
H3K4me3	6117	6611	3575	11404	14068	3536	7774	13537
H3K9me3	17977	20775	22662	16730	21989	24037	24907	17614
Number of annotated peaks for each chromatin modification per condition
	Male 48hr APF fru	Male 1-day Adult fru	Male 10-12 day Adult fru	Male 1-day Adult elav	Female 48hr APF fru	Female 1-day Adult fru	Female 10-12 day Adult fru	Female 1-day Adult elav
H3K27ac	6984	1470	15659	21528	11220	1470	11395	13231
H3K27me3	17688	17528	14068	13295	22006	22250	17875	14573
H3K36me3	22273	18026	17324	10685	22601	26366	9535	8102
H3K4me3	6114	6578	3546	11384	14068	3523	7758	13529
H3K9me3	17973	20737	22639	16648	21985	24022	24892	17573
Number of genes containing an annotated peak for each chromatin modification per condition
	Male 48hr APF fru	Male 1-day Adult fru	Male 10-12 day Adult fru	Male 1-day Adult elav	Female 48hr APF fru	Female 1-day Adult fru	Female 10-12 day Adult fru	Female 1-day Adult elav
H3K27ac	4157	1163	4666	4873	5786	1184	3736	3794
H3K27me3	7268	7214	5643	5604	9257	9172	7143	5979
H3K36me3	10657	9407	9523	7043	10786	11501	6723	5797
H3K4me3	4867	4908	2989	6457	7884	2546	5577	6993
H3K9me3	7125	8867	9502	6921	8942	9987	10543	7285

## Sheet: 4.Genes with bivalentpromoters
48hr APF Male genes with H3K4me3 and H3K27me3				1-day adult Male genes with H3K4me3 and H3K27me3				10-12 day Male genes with H3K4me3 and H3K27me3				48hr APF Female genes with H3K4me3 and H3K27me3				1-day adult Female genes with H3K4me3 and H3K27me3				10-12 day Female genes with H3K4me3 and H3K27me3
Gene name	Flybase identifier	Secondary Identifier		Gene name	Flybase identifier	Secondary Identifier		Gene name	Flybase identifier	Secondary Identifier		Gene name	Flybase identifier	Secondary Identifier		Gene name	Flybase identifier	Secondary Identifier		Gene name	Flybase identifier	Secondary Identifier
CG10011	FBgn0039590	CG10011		fkh	FBgn0000659	CG10002		MAGE	FBgn0037481	CG10059		CG10000	FBgn0039596	CG10000		fkh	FBgn0000659	CG10002		fkh	FBgn0000659	CG10002
Fak	FBgn0020440	CG10023		CG10011	FBgn0039590	CG10011		CG10104	FBgn0033933	CG10104		fkh	FBgn0000659	CG10002		drm	FBgn0024244	CG10016		tj	FBgn0000964	CG10034
for	FBgn0000721	CG10033		Fak	FBgn0020440	CG10023		Sin1	FBgn0033935	CG10105		CG10005	FBgn0037972	CG10005		for	FBgn0000721	CG10033		otp	FBgn0015524	CG10036
otp	FBgn0015524	CG10036		tj	FBgn0000964	CG10034		ttv	FBgn0265974	CG10117		CG10011	FBgn0039590	CG10011		tj	FBgn0000964	CG10034		vvl	FBgn0086680	CG10037
vvl	FBgn0086680	CG10037		otp	FBgn0015524	CG10036		beat-IV	FBgn0039089	CG10152		drm	FBgn0024244	CG10016		vvl	FBgn0086680	CG10037		CG10038	FBgn0038013	CG10038
RtGEF	FBgn0015803	CG10043		vvl	FBgn0086680	CG10037		eIF3d1	FBgn0040227	CG10161		CG10019	FBgn0031568	CG10019		Prat2	FBgn0041194	CG10078		MAGE	FBgn0037481	CG10059
MAGE	FBgn0037481	CG10059		MAGE	FBgn0037481	CG10059		Ugt303B3	FBgn0039085	CG10170		Fak	FBgn0020440	CG10023		Ist1	FBgn0035715	CG10103		spir	FBgn0003475	CG10076
Galphai	FBgn0001104	CG10060		Galphai	FBgn0001104	CG10060		Cyp6a8	FBgn0013772	CG10248		for	FBgn0000721	CG10033		robl62A	FBgn0028567	CG1014		Egfr	FBgn0003731	CG10079
emc	FBgn0000575	CG1007		spir	FBgn0003475	CG10076		gzl	FBgn0037442	CG10277		tj	FBgn0000964	CG10034		Adgf-E	FBgn0033952	CG10143		CG10089	FBgn0036369	CG10089
spir	FBgn0003475	CG10076		Egfr	FBgn0003731	CG10079		CG10301	FBgn0039106	CG10301		otp	FBgn0015524	CG10036		CG10184	FBgn0039094	CG10184		GstD9	FBgn0038020	CG10091
Egfr	FBgn0003731	CG10079		Tim17a1	FBgn0038018	CG10090		Osi4	FBgn0037412	CG10303		vvl	FBgn0086680	CG10037		hui	FBgn0033968	CG10200		ArgRS-m	FBgn0037526	CG10092
mahj	FBgn0034641	CG10080		Ist1	FBgn0035715	CG10103		RpS26	FBgn0261597	CG10305		CG10038	FBgn0038013	CG10038		Pgm2b	FBgn0033969	CG10202		CG10096	FBgn0038032	CG10096
CG10082	FBgn0034644	CG10082		ttv	FBgn0265974	CG10117		abd-A	FBgn0000014	CG10325		rho	FBgn0004635	CG1004		CG10237	FBgn0032783	CG10237		Ir84a	FBgn0037501	CG10101
dpr15	FBgn0037993	CG10095		beat-Va	FBgn0038087	CG10134		Lar	FBgn0000464	CG10443		RtGEF	FBgn0015803	CG10043		prt	FBgn0043005	CG10251		Cpsf160	FBgn0024698	CG10110
Tsp42Ee	FBgn0029506	CG10106		CG10139	FBgn0033951	CG10139		Sdc	FBgn0010415	CG10497		Rx	FBgn0020617	CG10052		CG10264	FBgn0038394	CG10264		ttv	FBgn0265974	CG10117
ttv	FBgn0265974	CG10117		mspo	FBgn0020269	CG10145		ko	FBgn0020294	CG10573		CG10053	FBgn0037490	CG10053		Pak	FBgn0267698	CG10295		beat-Va	FBgn0038087	CG10134
RpI1	FBgn0019938	CG10122		Fgop2	FBgn0031871	CG10158		Eip63E	FBgn0005640	CG10579		MAGE	FBgn0037481	CG10059		Hr83	FBgn0037436	CG10296		CG10139	FBgn0033951	CG10139
Spred	FBgn0020767	CG10155		kn	FBgn0001319	CG10197		Msr-110	FBgn0015766	CG10596		Galphai	FBgn0001104	CG10060		Osi4	FBgn0037412	CG10303		mspo	FBgn0020269	CG10145
grnd	FBgn0032682	CG10176		Pgm2b	FBgn0033969	CG10202		sinu	FBgn0010894	CG10624		Sas-4	FBgn0011020	CG10061		CycJ	FBgn0010317	CG10308		beat-IV	FBgn0039089	CG10152
cyst	FBgn0032796	CG10188		CG10222	FBgn0036356	CG10222		sowah	FBgn0036302	CG10632		emc	FBgn0000575	CG1007		alpha-Est1	FBgn0015568	CG1031		Spred	FBgn0020767	CG10155
kn	FBgn0001319	CG10197		Kank	FBgn0027596	CG10249		CG10651	FBgn0032853	CG10651		RpL29	FBgn0016726	CG10071		NPF	FBgn0027109	CG10342		Hasp	FBgn0032797	CG10186
Nup98-96	FBgn0039120	CG10198		Rm62	FBgn0003261	CG10279		Lim3	FBgn0002023	CG10699		spir	FBgn0003475	CG10076		CG10348	FBgn0032707	CG10348		cyst	FBgn0032796	CG10188
Dmtn	FBgn0037443	CG1021		TfIIFalpha	FBgn0010282	CG10281		brat	FBgn0010300	CG10719		CG10077	FBgn0035720	CG10077		CG10353	FBgn0030349	CG10353		Mlp84B	FBgn0014863	CG1019
Top2	FBgn0284220	CG10223		how	FBgn0264491	CG10293		Awh	FBgn0013751	CG1072		Egfr	FBgn0003731	CG10079		CG10359	FBgn0035452	CG10359		Poc1	FBgn0036354	CG10191
RanBP3	FBgn0039110	CG10225		CG10301	FBgn0039106	CG10301		CG10909	FBgn0038090	CG10909		mahj	FBgn0034641	CG10080		Irk3	FBgn0032706	CG10369		kn	FBgn0001319	CG10197
Pcf11	FBgn0264962	CG10228		bsf	FBgn0284256	CG10302		Prosalpha5	FBgn0016697	CG10938		CG10082	FBgn0034644	CG10082		wrapper	FBgn0025878	CG10382		Dmtn	FBgn0037443	CG1021
CG10274	FBgn0035690	CG10274		abd-A	FBgn0000014	CG10325		Hip1	FBgn0036309	CG10971		CG10089	FBgn0036369	CG10089		Ubx	FBgn0003944	CG10388		Top2	FBgn0284220	CG10223
CG10283	FBgn0032681	CG10283		TBPH	FBgn0025790	CG10327		CG11050	FBgn0031836	CG11050		ArgRS-m	FBgn0037526	CG10092		Obp69a	FBgn0011279	CG10436		Kank	FBgn0027596	CG10249
fmt	FBgn0035688	CG10289		CG10343	FBgn0032703	CG10343		Aldh-III	FBgn0010548	CG11140		CG10098	FBgn0037472	CG10098		zen	FBgn0004053	CG1046		nau	FBgn0002922	CG10250
how	FBgn0264491	CG10293		Irk3	FBgn0032706	CG10369		Liprin-gamma	FBgn0034720	CG11206		Ist1	FBgn0035715	CG10103		CG10472	FBgn0035670	CG10472		Zif	FBgn0037446	CG10267
Pak	FBgn0267698	CG10295		Rpt5	FBgn0028684	CG10370		alpha-Est9	FBgn0015577	CG1128		CG10104	FBgn0033933	CG10104		eyg	FBgn0000625	CG10488		gzl	FBgn0037442	CG10277
Scr	FBgn0003339	CG1030		CG10376	FBgn0032702	CG10376		scrt	FBgn0004880	CG1130		velo	FBgn0035713	CG10107		Phlpp	FBgn0032749	CG10493		Rm62	FBgn0003261	CG10279
CG10301	FBgn0039106	CG10301		Hrb27C	FBgn0004838	CG10377		CG11317	FBgn0039816	CG11317		ttv	FBgn0265974	CG10117		CG10505	FBgn0034612	CG10505		how	FBgn0264491	CG10293
RpS26	FBgn0261597	CG10305		Gem2	FBgn0036850	CG10419		CG11319	FBgn0031835	CG11319		RpI1	FBgn0019938	CG10122		CG10514	FBgn0039312	CG10514		Scr	FBgn0003339	CG1030
nonA-l	FBgn0015520	CG10328		twz	FBgn0034636	CG10440		Mul1	FBgn0035483	CG1134		Had2	FBgn0033949	CG10131		Tektin-C	FBgn0035638	CG10541		nonA-l	FBgn0015520	CG10328
CG10333	FBgn0032690	CG10333		Lar	FBgn0000464	CG10443		polybromo	FBgn0039227	CG11375		CG10139	FBgn0033951	CG10139		Cralbp	FBgn0035636	CG10546		CG10357	FBgn0035453	CG10357
spi	FBgn0005672	CG10334		CG10445	FBgn0037531	CG10445		NPFR	FBgn0037408	CG1147		Adgf-E	FBgn0033952	CG10143		CG10555	FBgn0030034	CG10555		CG10362	FBgn0030358	CG10362
CG10375	FBgn0039116	CG10375		zen	FBgn0004053	CG1046		svp	FBgn0003651	CG11502		Vps8	FBgn0035704	CG10144		CG10561	FBgn0002036	CG10561		Ubx	FBgn0003944	CG10388
mbc	FBgn0015513	CG10379		CG10465	FBgn0033017	CG10465		kermit	FBgn0010504	CG11546		CG10151	FBgn0033960	CG10151		Ac78C	FBgn0024150	CG10564		Gem2	FBgn0036850	CG10419
CG10413	FBgn0032689	CG10413		vn	FBgn0003984	CG10491		CG11779	FBgn0038683	CG11779		Spred	FBgn0020767	CG10155		ko	FBgn0020294	CG10573		Lar	FBgn0000464	CG10443
Atac2	FBgn0032691	CG10414		CG10495	FBgn0032750	CG10495		hyx	FBgn0037657	CG11990		Fgop2	FBgn0031871	CG10158		mirr	FBgn0014343	CG10601		zen	FBgn0004053	CG1046
Gem2	FBgn0036850	CG10419		Sdc	FBgn0010415	CG10497		CG12007	FBgn0037293	CG12007		Mfap1	FBgn0035294	CG1017		CG10602	FBgn0032721	CG10602		eyg	FBgn0000625	CG10488
INPP5E	FBgn0036273	CG10426		amd	FBgn0000075	CG10501		Pal1	FBgn0283510	CG12130		CG10184	FBgn0039094	CG10184		bsh	FBgn0000529	CG10604		TAF1C-like	FBgn0034631	CG10496
CG10433	FBgn0034638	CG10433		CG10508	FBgn0037060	CG10508		red	FBgn0285913	CG12207		Hasp	FBgn0032797	CG10186		CG10650	FBgn0046302	CG10650		Sdc	FBgn0010415	CG10497
Lar	FBgn0000464	CG10443		Rdl	FBgn0004244	CG10537		CG12391	FBgn0033581	CG12391		cyst	FBgn0032796	CG10188		CG10654	FBgn0036294	CG10654		Rdl	FBgn0004244	CG10537
CG10462	FBgn0032815	CG10462		CdGAPr	FBgn0032821	CG10538		Mad	FBgn0011648	CG12399		Poc1	FBgn0036354	CG10191		AANATL3	FBgn0032839	CG10659		Eip63E	FBgn0005640	CG10579
Pcyt1	FBgn0041342	CG1049		Cralbp	FBgn0035636	CG10546		CG12448	FBgn0028857	CG12448		CG10195	FBgn0032787	CG10195		Lim3	FBgn0002023	CG10699		Acer	FBgn0016122	CG10593
CG10495	FBgn0032750	CG10495		Ac78C	FBgn0024150	CG10564		Ir67a	FBgn0036010	CG12525		kn	FBgn0001319	CG10197		Moe	FBgn0011661	CG10701		CG10602	FBgn0032721	CG10602
TAF1C-like	FBgn0034631	CG10496		CG10565	FBgn0037051	CG10565		rdx	FBgn0264493	CG12537		Nup98-96	FBgn0039120	CG10198		Rca1	FBgn0017551	CG10800		bsh	FBgn0000529	CG10604
Sdc	FBgn0010415	CG10497		Cdk8	FBgn0015618	CG10572		rl	FBgn0003256	CG12559		Pgm2b	FBgn0033969	CG10202		alpha-Est4	FBgn0015572	CG1082		caup	FBgn0015919	CG10605
Elp1	FBgn0037926	CG10535		Pdss2	FBgn0037044	CG10585		beat-IIIa	FBgn0265607	CG12621		CG10205	FBgn0033970	CG10205		CG10822	FBgn0034478	CG10822		sinu	FBgn0010894	CG10624
CdGAPr	FBgn0032821	CG10538		CG10600	FBgn0032717	CG10600		olf413	FBgn0037153	CG12673		NaPi-T	FBgn0016684	CG10207		CG10845	FBgn0039246	CG10845		sowah	FBgn0036302	CG10632
S6k	FBgn0283472	CG10539		mirr	FBgn0014343	CG10601		Eaf6	FBgn0035624	CG12756		Dmtn	FBgn0037443	CG1021		Rh3	FBgn0003249	CG10888		Swip-1	FBgn0032731	CG10641
CG10543	FBgn0034570	CG10543		CG10616	FBgn0036286	CG10616		l(2)09851	FBgn0022288	CG12792		tst	FBgn0039117	CG10210		alpha-Est5	FBgn0261393	CG1089		slo	FBgn0003429	CG10693
ara	FBgn0015904	CG10571		Tsf2	FBgn0036299	CG10620		polyph	FBgn0033572	CG12943		Hrd3	FBgn0028475	CG10221		CAH4	FBgn0039235	CG10899		Pat1	FBgn0029878	CG10695
ko	FBgn0020294	CG10573		sowah	FBgn0036302	CG10632		reb	FBgn0033667	CG13183		CG10222	FBgn0036356	CG10222		osk	FBgn0003015	CG10901		Alh	FBgn0261238	CG1070
Eip63E	FBgn0005640	CG10579		CG10669	FBgn0039329	CG10669		CG13229	FBgn0033579	CG13229		Pcf11	FBgn0264962	CG10228		CG10912	FBgn0034296	CG10912		E2f2	FBgn0024371	CG1071
fng	FBgn0011591	CG10580		slo	FBgn0003429	CG10693		CG13272	FBgn0086673	CG13272		Kat60	FBgn0040208	CG10229		Corp	FBgn0030028	CG10965		brat	FBgn0010300	CG10719
Msr-110	FBgn0015766	CG10596		ImpL1	FBgn0001256	CG10717		ppk17	FBgn0032602	CG13278		Rpn9	FBgn0028691	CG10230		CG10969	FBgn0036310	CG10969		CG10803	FBgn0029666	CG10803
mirr	FBgn0014343	CG10601		Tgi	FBgn0036373	CG10741		CG13300	FBgn0035699	CG13300		Mocs2B	FBgn0039280	CG10238		scaf	FBgn0033033	CG11066		DCTN5-p25	FBgn0040228	CG10846
caup	FBgn0015919	CG10605		l(2)k09022	FBgn0086451	CG10805		CG13309	FBgn0035933	CG13309		CG1024	FBgn0027514	CG1024		dsx	FBgn0000504	CG11094		B52	FBgn0004587	CG10851
CG10616	FBgn0036286	CG10616		Rheb	FBgn0041191	CG1081		CG13442	FBgn0034546	CG13442		Kank	FBgn0027596	CG10249		pwn	FBgn0003174	CG11101		CG1090	FBgn0037238	CG1090
tup	FBgn0003896	CG10619		RyR	FBgn0011286	CG10844		CG13474	FBgn0036439	CG13474		Lap1	FBgn0033984	CG10255		BoYb	FBgn0037205	CG11133		fj	FBgn0000658	CG10917
sowah	FBgn0036302	CG10632		DCTN5-p25	FBgn0040228	CG10846		CG13579	FBgn0035010	CG13579		Pi4KIIIalpha	FBgn0267350	CG10260		CG11149	FBgn0031732	CG11149		CG10918	FBgn0031178	CG10918
Swip-1	FBgn0032731	CG10641		Regnase-1	FBgn0038769	CG10889		CG1371	FBgn0033482	CG1371		Zif	FBgn0037446	CG10267		CG11178	FBgn0030499	CG11178		Prosalpha5	FBgn0016697	CG10938
lama	FBgn0016031	CG10645		CG10898	FBgn0037911	CG10898		CG13847	FBgn0038967	CG13847		D19A	FBgn0022935	CG10269		phr	FBgn0003082	CG11205		nebu	FBgn0036316	CG10960
COX4	FBgn0032833	CG10664		CG1090	FBgn0037238	CG1090		CG13972	FBgn0039522	CG13972		CG10274	FBgn0035690	CG10274		feo	FBgn0030241	CG11207		Hip1	FBgn0036309	CG10971
Alh	FBgn0261238	CG1070		CG10907	FBgn0036207	CG10907		CG13989	FBgn0031786	CG13989		gzl	FBgn0037442	CG10277		CG11286	FBgn0037516	CG11286		CG10979	FBgn0037379	CG10979
E2f2	FBgn0024371	CG1071		fj	FBgn0000658	CG10917		LRR	FBgn0033212	CG1399		GATAe	FBgn0038391	CG10278		FoxL1	FBgn0004895	CG1132		CtsB	FBgn0030521	CG10992
brat	FBgn0010300	CG10719		CG1092	FBgn0037228	CG1092		CG14073	FBgn0036814	CG14073		CG10283	FBgn0032681	CG10283		CG11353	FBgn0035557	CG11353		Clic	FBgn0030529	CG10997
Awh	FBgn0013751	CG1072		CG10936	FBgn0034253	CG10936		CG14184	FBgn0036932	CG14184		CG10286	FBgn0037439	CG10286		CG11379	FBgn0040362	CG11379		Ent3	FBgn0036319	CG11010
flr	FBgn0260049	CG10724		Prosalpha5	FBgn0016697	CG10938		CG14257	FBgn0039479	CG14257		Gasp	FBgn0026077	CG10287		CG1139	FBgn0035300	CG1139		nompC	FBgn0016920	CG11020
loj	FBgn0061492	CG10733		Hip1	FBgn0036309	CG10971		Epg5	FBgn0038651	CG14299		fmt	FBgn0035688	CG10289		Trxr-2	FBgn0037170	CG11401		Kdm2	FBgn0037659	CG11033
Tgi	FBgn0036373	CG10741		CG11007	FBgn0034455	CG11007		fru	FBgn0004652	CG14307		how	FBgn0264491	CG10293		Orai	FBgn0041585	CG11430		Ufl1	FBgn0037467	CG1104
CG10795	FBgn0034626	CG10795		Ent3	FBgn0036319	CG11010		haf	FBgn0261509	CG14351		Pak	FBgn0267698	CG10295		CG11437	FBgn0037165	CG11437		CG11050	FBgn0031836	CG11050
Rca1	FBgn0017551	CG10800		isopeptidase-T-3	FBgn0028372	CG11025		thw	FBgn0037487	CG14608		Hr83	FBgn0037436	CG10296		CG11453	FBgn0038734	CG11453		aux	FBgn0037218	CG1107
l(2)k09022	FBgn0086451	CG10805		Ufl1	FBgn0037467	CG1104		ey	FBgn0005558	CG1464		Scr	FBgn0003339	CG1030		CG11459	FBgn0037396	CG11459		Gadd45	FBgn0033153	CG11086
CG10809	FBgn0036052	CG10809		Efhc1.2	FBgn0034487	CG11048		PGRP-LB	FBgn0037906	CG14704		bsf	FBgn0284256	CG10302		Osi2	FBgn0037410	CG1148		Nup93-1	FBgn0027537	CG11092
DCTN5-p25	FBgn0040228	CG10846		CG11050	FBgn0031836	CG11050		ATP8B	FBgn0037989	CG14741		RpS26	FBgn0261597	CG10305		br	FBgn0283451	CG11491		dsx	FBgn0000504	CG11094
enc	FBgn0004875	CG10847		aux	FBgn0037218	CG1107		CG14853	FBgn0038246	CG14853		eIF3k	FBgn0034654	CG10306		Diedel	FBgn0039666	CG11501		so	FBgn0003460	CG11121
Regnase-1	FBgn0038769	CG10889		pk	FBgn0003090	CG11084		AstC	FBgn0032336	CG14919		CG10321	FBgn0034643	CG10321		svp	FBgn0003651	CG11502		CG11123	FBgn0033169	CG11123
fj	FBgn0000658	CG10917		Gadd45	FBgn0033153	CG11086		ckd	FBgn0035427	CG14959		abd-A	FBgn0000014	CG10325		Tig	FBgn0011722	CG11527		CG11131	FBgn0037204	CG11131
Rtf1	FBgn0034722	CG10955		dsx	FBgn0000504	CG11094		nyo	FBgn0039852	CG1499		TBPH	FBgn0025790	CG10327		Osi7	FBgn0037414	CG1153		Aldh-III	FBgn0010548	CG11140
nebu	FBgn0036316	CG10960		CG11112	FBgn0033164	CG11112		Cip4	FBgn0035533	CG15015		nonA-l	FBgn0015520	CG10328		Osi12	FBgn0037419	CG1154		Hey	FBgn0027788	CG11194
Hip1	FBgn0036309	CG10971		CG11123	FBgn0033169	CG11123		Mctp	FBgn0034389	CG15078		spi	FBgn0005672	CG10334		Osi14	FBgn0040279	CG1155		ACC	FBgn0033246	CG11198
Dap160	FBgn0023388	CG1099		Sox102F	FBgn0039938	CG11153		CG15080	FBgn0034391	CG15080		CG10341	FBgn0032701	CG10341		CG11596	FBgn0023522	CG11596		CG11247	FBgn0037120	CG11247
CG1103	FBgn0037235	CG1103		Aatf	FBgn0031851	CG11188		tmod	FBgn0082582	CG1539		Rat1	FBgn0031868	CG10354		Pi3K68D	FBgn0015278	CG11621		CG11257	FBgn0034442	CG11257
CG11050	FBgn0031836	CG11050		CG11191	FBgn0033249	CG11191		CG15553	FBgn0039817	CG15553		CG10362	FBgn0030358	CG10362		CG11635	FBgn0033283	CG11635		Cul6	FBgn0036332	CG11261
pk	FBgn0003090	CG11084		Hey	FBgn0027788	CG11194		Osi13	FBgn0037422	CG15595		msb1l	FBgn0027949	CG10364		Abd-B	FBgn0000015	CG11648		Srrm1	FBgn0036340	CG11274
CG11123	FBgn0033169	CG11123		ACC	FBgn0033246	CG11198		RpS30	FBgn0038834	CG15697		Irk3	FBgn0032706	CG10369		CG11668	FBgn0038113	CG11668		CG11279	FBgn0036342	CG11279
Gyf	FBgn0039936	CG11148		phr	FBgn0003082	CG11205		CG15715	FBgn0036538	CG15715		Ubx	FBgn0003944	CG10388		CG11674	FBgn0030551	CG11674		trn	FBgn0010452	CG11280
Sox102F	FBgn0039938	CG11153		CG11211	FBgn0033067	CG11211		CG15800	FBgn0034904	CG15800		Cyp310a1	FBgn0032693	CG10391		Cyp4g15	FBgn0030304	CG11715		caps	FBgn0023095	CG11282
Rcd6	FBgn0034530	CG11175		CG11248	FBgn0037117	CG11248		Apoltp	FBgn0032136	CG15828		CRAT	FBgn0037440	CG1041		CNT1	FBgn0033371	CG11778		CG1129	FBgn0037279	CG1129
Liprin-alpha	FBgn0046704	CG11199		CG11257	FBgn0034442	CG11257		Spn	FBgn0010905	CG16757		Atac2	FBgn0032691	CG10414		beta4GalT7	FBgn0039258	CG11780		Sirt7	FBgn0039631	CG11305
Ptr	FBgn0262867	CG11212		Srrm1	FBgn0036340	CG11274		CG16798	FBgn0032856	CG16798		CG10418	FBgn0036277	CG10418		Hr96	FBgn0015240	CG11783		CG11317	FBgn0039816	CG11317
CG11247	FBgn0037120	CG11247		scrt	FBgn0004880	CG1130		Ref2	FBgn0032439	CG17031		Gem2	FBgn0036850	CG10419		GstE13	FBgn0033381	CG11784		CG11319	FBgn0031835	CG11319
CG11257	FBgn0034442	CG11257		CG11317	FBgn0039816	CG11317		mthl10	FBgn0035132	CG17061		twz	FBgn0034636	CG10440		bai	FBgn0045866	CG11785		homer	FBgn0025777	CG11324
MICAL-like	FBgn0036333	CG11259		CG11319	FBgn0031835	CG11319		CG17508	FBgn0039970	CG17508		Lar	FBgn0000464	CG10443		Sod1	FBgn0003462	CG11793		Tsp	FBgn0031850	CG11326
CG11262	FBgn0036329	CG11262		Nhe3	FBgn0028703	CG11328		RpL10	FBgn0024733	CG17521		zen	FBgn0004053	CG1046		Obp56a	FBgn0034468	CG11797		opa	FBgn0003002	CG1133
CG11279	FBgn0036342	CG11279		Mul1	FBgn0035483	CG1134		dnt	FBgn0024245	CG17559		CG10465	FBgn0033017	CG10465		BORCS5	FBgn0030346	CG11802		PNPase	FBgn0039846	CG11337
homer	FBgn0025777	CG11324		CG11349	FBgn0035550	CG11349		CG17716	FBgn0000633	CG17716		Jon65Ai	FBgn0035667	CG10475		rempA	FBgn0260933	CG11838		Mul1	FBgn0035483	CG1134
opa	FBgn0003002	CG1133		Rcd5	FBgn0263832	CG1135		Uba1	FBgn0023143	CG1782		PolE2	FBgn0035644	CG10489		m-cup	FBgn0038488	CG11896		DOR	FBgn0035542	CG11347
Mul1	FBgn0035483	CG1134		jim	FBgn0027339	CG11352		Xrp1	FBgn0261113	CG17836		Pcyt1	FBgn0041342	CG1049		Mesh1	FBgn0039650	CG11900		nAChRbeta1	FBgn0000038	CG11348
CG11342	FBgn0035537	CG11342		CG11360	FBgn0039920	CG11360		14-3-3zeta	FBgn0004907	CG17870		vn	FBgn0003984	CG10491		rha	FBgn0027376	CG11908		jim	FBgn0027339	CG11352
jim	FBgn0027339	CG11352		polybromo	FBgn0039227	CG11375		Mhc	FBgn0264695	CG17927		CG10495	FBgn0032750	CG10495		ND-49L	FBgn0039331	CG11913		CG11377	FBgn0031217	CG11377
CG11357	FBgn0035558	CG11357		CG11377	FBgn0031217	CG11377		RpL38	FBgn0040007	CG18001		TAF1C-like	FBgn0034631	CG10496		CG12004	FBgn0035236	CG12004		CG11378	FBgn0040364	CG11378
CG11377	FBgn0031217	CG11377		SCOT	FBgn0035298	CG1140		Eip78C	FBgn0004865	CG18023		amd	FBgn0000075	CG10501		GV1	FBgn0027790	CG12023		CG11398	FBgn0040366	CG11398
Pcif1	FBgn0037021	CG11399		Orai	FBgn0041585	CG11430		SoxN	FBgn0029123	CG18024		tub	FBgn0003882	CG10520		CG12038	FBgn0035179	CG12038		CG11406	FBgn0034990	CG11406
Orai	FBgn0041585	CG11430		CG11454	FBgn0031224	CG11454		shot	FBgn0013733	CG18076		NetB	FBgn0015774	CG10521		mud	FBgn0002873	CG12047		CG11425	FBgn0037167	CG11425
IleRS	FBgn0027086	CG11471		Osi2	FBgn0037410	CG1148		Octalpha2R	FBgn0038653	CG18208		sti	FBgn0002466	CG10522		CG12111	FBgn0030050	CG12111		Orai	FBgn0041585	CG11430
PAN3	FBgn0035397	CG11486		Srpk79D	FBgn0025702	CG11489		Mondo	FBgn0032940	CG18362		Elp1	FBgn0037926	CG10535		CG12121	FBgn0030109	CG12121		CG11444	FBgn0029715	CG11444
Tbc1d15-17	FBgn0031233	CG11490		Tbc1d15-17	FBgn0031233	CG11490		Dhc98D	FBgn0013813	CG1842		Rdl	FBgn0004244	CG10537		CG12123	FBgn0030039	CG12123		IleRS	FBgn0027086	CG11471
svp	FBgn0003651	CG11502		svp	FBgn0003651	CG11502		Adk3	FBgn0026602	CG1851		cpa	FBgn0034577	CG10540		oc	FBgn0004102	CG12154		Srpk79D	FBgn0025702	CG11489
Ptp99A	FBgn0004369	CG11516		Ptp99A	FBgn0004369	CG11516		Gdap2	FBgn0042135	CG18812		Tektin-C	FBgn0035638	CG10541		CG12164	FBgn0033158	CG12164		svp	FBgn0003651	CG11502
Asator	FBgn0039908	CG11533		Osi7	FBgn0037414	CG1153		CG1894	FBgn0039585	CG1894		Bre1	FBgn0086694	CG10542		Klp59D	FBgn0034827	CG12192		Ptp99A	FBgn0004369	CG11516
CG11537	FBgn0035400	CG11537		Asator	FBgn0039908	CG11533		RhoGAP100F	FBgn0039883	CG1976		CG10555	FBgn0030034	CG10555		CG12206	FBgn0029662	CG12206		Asator	FBgn0039908	CG11533
kermit	FBgn0010504	CG11546		CG11537	FBgn0035400	CG11537		CSN7	FBgn0028836	CG2038		CG10561	FBgn0002036	CG10561		CG12231	FBgn0031026	CG12231		CG11537	FBgn0035400	CG11537
CG11562	FBgn0031247	CG11562		kermit	FBgn0010504	CG11546		dco	FBgn0002413	CG2048		Ac78C	FBgn0024150	CG10564		mira	FBgn0021776	CG12249		Rph	FBgn0030230	CG11556
CG11588	FBgn0036221	CG11588		CG11560	FBgn0036249	CG11560		CG2162	FBgn0035388	CG2162		CG10565	FBgn0037051	CG10565		euc	FBgn0038665	CG12269		nkd	FBgn0002945	CG11614
nkd	FBgn0002945	CG11614		CG11588	FBgn0036221	CG11588		Zip102B	FBgn0039902	CG2177		ara	FBgn0015904	CG10571		CG12279	FBgn0038080	CG12279		mle	FBgn0002774	CG11680
Abd-B	FBgn0000015	CG11648		CG11629	FBgn0032965	CG11629		CG2225	FBgn0032957	CG2225		Cdk8	FBgn0015618	CG10572		pdm2	FBgn0004394	CG12287		Mob2	FBgn0259481	CG11711
CG11658	FBgn0036196	CG11658		Abd-B	FBgn0000015	CG11648		CG2267	FBgn0039792	CG2267		ko	FBgn0020294	CG10573		AIMP2	FBgn0036515	CG12304		Sod1	FBgn0003462	CG11793
Nc73EF	FBgn0010352	CG11661		CG11668	FBgn0038113	CG11668		CG2993	FBgn0037521	CG2993		Eip63E	FBgn0005640	CG10579		CG12347	FBgn0038558	CG12347		chn	FBgn0015371	CG11798
CG11672	FBgn0037563	CG11672		mle	FBgn0002774	CG11680		CG30158	FBgn0050158	CG30158		fng	FBgn0011591	CG10580		Lac	FBgn0010238	CG12369		dan	FBgn0039286	CG11849
CG11722	FBgn0037777	CG11722		CG11755	FBgn0037611	CG11755		CG30419	FBgn0050419	CG30419		Acer	FBgn0016122	CG10593		Nnp-1	FBgn0022069	CG12396		CG11873	FBgn0039633	CG11873
CG11737	FBgn0037592	CG11737		Sod1	FBgn0003462	CG11793		Opbp	FBgn0050443	CG30443		Msr-110	FBgn0015766	CG10596		CG12496	FBgn0040385	CG12496		Atg14	FBgn0039636	CG11877
CG11777	FBgn0033527	CG11777		stan	FBgn0024836	CG11895		Pgant9	FBgn0050463	CG30463		CG10600	FBgn0032717	CG10600		CG12511	FBgn0031729	CG12511		CG11902	FBgn0028647	CG11902
CG11779	FBgn0038683	CG11779		CG11902	FBgn0028647	CG11902		cindr	FBgn0027598	CG31012		mirr	FBgn0014343	CG10601		CG12538	FBgn0038157	CG12538		fd96Ca	FBgn0004897	CG11921
Sod1	FBgn0003462	CG11793		Ent1	FBgn0031250	CG11907		side	FBgn0016061	CG31062		caup	FBgn0015919	CG10605		beta-Man	FBgn0037215	CG12582		kat-60L1	FBgn0037375	CG1193
ced-6	FBgn0029092	CG11804		fd96Ca	FBgn0004897	CG11921		TTLL5	FBgn0051108	CG31108		CG10616	FBgn0036286	CG10616		CG12589	FBgn0040684	CG12589		pico	FBgn0261811	CG11940
Nup358	FBgn0039302	CG11856		CG11970	FBgn0027503	CG11970		CG31145	FBgn0051145	CG31145		tup	FBgn0003896	CG10619		Cpr64Ad	FBgn0035513	CG1259		cora	FBgn0010434	CG11949
CG11857	FBgn0039303	CG11857		E(var)3-9	FBgn0260243	CG11971		Nlg1	FBgn0051146	CG31146		sinu	FBgn0010894	CG10624		CG12617	FBgn0040996	CG12617		CG11964	FBgn0037644	CG11964
CG11873	FBgn0039633	CG11873		neur	FBgn0002932	CG11988		Dscam3	FBgn0261046	CG31190		nst	FBgn0036298	CG10627		lab	FBgn0002522	CG1264		Rpb5	FBgn0033571	CG11979
Atg14	FBgn0039636	CG11877		Aplip1	FBgn0040281	CG1200		stumps	FBgn0020299	CG31317		Itpr	FBgn0010051	CG1063		btd	FBgn0000233	CG12653		neur	FBgn0002932	CG11988
stan	FBgn0024836	CG11895		Pxn	FBgn0011828	CG12002		dpr17	FBgn0051361	CG31361		sowah	FBgn0036302	CG10632		CG12661	FBgn0030071	CG12661		Aplip1	FBgn0040281	CG1200
fd96Ca	FBgn0004897	CG11921		CG12003	FBgn0035234	CG12003		CG31457	FBgn0051457	CG31457		Nak	FBgn0015772	CG10637		Obp8a	FBgn0030103	CG12665		CG12007	FBgn0037293	CG12007
ScsbetaA	FBgn0037643	CG11963		PIG-B	FBgn0035464	CG12006		CG31496	FBgn0051496	CG31496		L2HGDH	FBgn0032729	CG10639		CG12684	FBgn0029717	CG12684		wts	FBgn0011739	CG12072
CG11964	FBgn0037644	CG11964		CG12012	FBgn0035444	CG12012		chinmo	FBgn0086758	CG31666		Uev1A	FBgn0035601	CG10640		CG12688	FBgn0029707	CG12688		cue	FBgn0011204	CG12086
hyx	FBgn0037657	CG11990		MED14	FBgn0035145	CG12031		Spt3	FBgn0037981	CG3169		Swip-1	FBgn0032731	CG10641		zld	FBgn0259789	CG12701		CG12118	FBgn0030101	CG12118
CG12004	FBgn0035236	CG12004		CG12071	FBgn0039808	CG12071		Trim9	FBgn0051721	CG31721		Klp64D	FBgn0004380	CG10642		CG12702	FBgn0031070	CG12702		p130CAS	FBgn0035101	CG1212
PIG-B	FBgn0035464	CG12006		CG12133	FBgn0033469	CG12133		CenG1A	FBgn0028509	CG31811		Rbm13	FBgn0030067	CG10648		Crag	FBgn0025864	CG12737		CG12121	FBgn0030109	CG12121
CG12007	FBgn0037293	CG12007		CG12159	FBgn0033232	CG12159		fry	FBgn0016081	CG32045		RpL30	FBgn0086710	CG10652		CG1275	FBgn0035321	CG1275		CG12123	FBgn0030039	CG12123
kst	FBgn0004167	CG12008		red	FBgn0285913	CG12207		scramb1	FBgn0052056	CG32056		hook	FBgn0001202	CG10653		l(3)mbn	FBgn0002440	CG12755		Pal1	FBgn0283510	CG12130
MED14	FBgn0035145	CG12031		peb	FBgn0003053	CG12212		dpr10	FBgn0052057	CG32057		CG10654	FBgn0036294	CG10654		Ubc84D	FBgn0017456	CG12799		Tsp42Ej	FBgn0033132	CG12143
l(2)05287	FBgn0284251	CG12050		CG12213	FBgn0260742	CG12213		Rbfox1	FBgn0052062	CG32062		Hf	FBgn0014000	CG10658		Fancl	FBgn0037781	CG12812		Pdp	FBgn0029958	CG12151
CG12054	FBgn0039831	CG12054		mira	FBgn0021776	CG12249		Drp1	FBgn0026479	CG3210		vih	FBgn0264848	CG10682		Npc2d	FBgn0037782	CG12813		Hira	FBgn0022786	CG12153
Sap-r	FBgn0000416	CG12070		MED25	FBgn0038760	CG12254		CG32206	FBgn0052206	CG32206		tral	FBgn0041775	CG10686		CG12836	FBgn0033140	CG12836		CG12159	FBgn0033232	CG12159
wts	FBgn0011739	CG12072		angel	FBgn0016762	CG12273		CG32333	FBgn0052333	CG32333		Ddc	FBgn0000422	CG10697		CG12934	FBgn0033541	CG12934		dpr20	FBgn0035170	CG12191
cue	FBgn0011204	CG12086		CG12279	FBgn0038080	CG12279		CG32376	FBgn0052376	CG32376		Lim3	FBgn0002023	CG10699		polyph	FBgn0033572	CG12943		red	FBgn0285913	CG12207
CG12128	FBgn0033473	CG12128		kek1	FBgn0015399	CG12283		shep	FBgn0052423	CG32423		Alh	FBgn0261238	CG1070		CG12985	FBgn0030881	CG12985		peb	FBgn0003053	CG12212
mri	FBgn0035107	CG1216		Diap1	FBgn0260635	CG12284		SPoCk	FBgn0052451	CG32451		Moe	FBgn0011661	CG10701		CG13023	FBgn0036677	CG13023		mlt	FBgn0265512	CG12214
red	FBgn0285913	CG12207		kar	FBgn0001296	CG12286		CG32473	FBgn0052473	CG32473		GCC88	FBgn0037881	CG10703		CG13033	FBgn0036638	CG13033		CG12267	FBgn0038057	CG12267
CG12213	FBgn0260742	CG12213		pdm2	FBgn0004394	CG12287		Pgant2	FBgn0031530	CG3254		toe	FBgn0036285	CG10704		CG13040	FBgn0036608	CG13040		kek1	FBgn0015399	CG12283
mlt	FBgn0265512	CG12214		stj	FBgn0261041	CG12295		CG3262	FBgn0032986	CG3262		SK	FBgn0029761	CG10706		CG13043	FBgn0036600	CG13043		stj	FBgn0261041	CG12295
CG12267	FBgn0038057	CG12267		spt4	FBgn0028683	CG12372		SdhB	FBgn0014028	CG3283		brat	FBgn0010300	CG10719		CG13046	FBgn0036595	CG13046		Sh	FBgn0003380	CG12348
angel	FBgn0016762	CG12273		CG12391	FBgn0033581	CG12391		VAChT	FBgn0270928	CG32848		barr	FBgn0014127	CG10726		CG13047	FBgn0036594	CG13047		Fpps	FBgn0025373	CG12389
Ptpmeg	FBgn0261985	CG1228		Mad	FBgn0011648	CG12399		mthl12	FBgn0045442	CG32853		vls	FBgn0003978	CG10728		CG13048	FBgn0036593	CG13048		CG1239	FBgn0037368	CG1239
Diap1	FBgn0260635	CG12284		Yip1d1	FBgn0032465	CG12404		CG32971	FBgn0052971	CG32971		CG10738	FBgn0036368	CG10738		CG13059	FBgn0036607	CG13059		Atg2	FBgn0044452	CG1241
CG12320	FBgn0038590	CG12320		TpnC4	FBgn0033027	CG12408		CG32982	FBgn0052982	CG32982		pigeon	FBgn0010309	CG10739		CG13065	FBgn0036590	CG13065		ckn	FBgn0033987	CG12424
CG1234	FBgn0037489	CG1234		CG12438	FBgn0032065	CG12438		SCAP	FBgn0033052	CG33131		Tgi	FBgn0036373	CG10741		CG13068	FBgn0036588	CG13068		ths	FBgn0033652	CG12443
Lac	FBgn0010238	CG12369		MEP-1	FBgn0035357	CG1244		Impbeta11	FBgn0284254	CG33139		CG10747	FBgn0032845	CG10747		Bace	FBgn0032049	CG13095		CG12496	FBgn0040385	CG12496
CG12391	FBgn0033581	CG12391		CG12448	FBgn0028857	CG12448		beat-IIIb	FBgn0053179	CG33179		Sf3a2	FBgn0036314	CG10754		Ctl1	FBgn0035523	CG1311		CG12512	FBgn0031703	CG12512
Mad	FBgn0011648	CG12399		CG12517	FBgn0032311	CG12517		pxb	FBgn0053207	CG33207		CG10761	FBgn0030015	CG10761		CG13127	FBgn0032176	CG13127		CG12581	FBgn0037213	CG12581
ckn	FBgn0033987	CG12424		rdx	FBgn0264493	CG12537		qvr	FBgn0260499	CG33472		Gbeta5	FBgn0030011	CG10763		CG13135	FBgn0032184	CG13135		dpr16	FBgn0037295	CG12591
MEP-1	FBgn0035357	CG1244		lab	FBgn0002522	CG1264		luna	FBgn0040765	CG33473		wit	FBgn0024179	CG10776		CG1314	FBgn0031134	CG1314		CG12609	FBgn0030952	CG12609
wuc	FBgn0033770	CG12442		btd	FBgn0000233	CG12653		CG3355	FBgn0031619	CG3355		Fip1	FBgn0037255	CG1078		CG13157	FBgn0033732	CG13157		olf413	FBgn0037153	CG12673
ths	FBgn0033652	CG12443		ncm	FBgn0086707	CG12750		form3	FBgn0053556	CG33556		ng3	FBgn0010295	CG10788		reb	FBgn0033667	CG13183		Eaf6	FBgn0035624	CG12756
CG12499	FBgn0038968	CG12499		sano	FBgn0034408	CG12758		CG3358	FBgn0033117	CG3358		CG10795	FBgn0034626	CG10795		CG13186	FBgn0033680	CG13186		CG12769	FBgn0033252	CG12769
rdx	FBgn0264493	CG12537		Rubicon	FBgn0030055	CG12772		CG33632	FBgn0053632	CG33632		Rca1	FBgn0017551	CG10800		CG13203	FBgn0033628	CG13203		Rubicon	FBgn0030055	CG12772
CG12547	FBgn0250830	CG12547		nahoda	FBgn0034797	CG12781		CheA46a	FBgn0262594	CG33800		CG10802	FBgn0029664	CG10802		Cpr47Ef	FBgn0033603	CG13214		hoe1	FBgn0041150	CG12787
CG12581	FBgn0037213	CG12581		l(2)09851	FBgn0022288	CG12792		Octbeta2R	FBgn0038063	CG33976		l(2)k09022	FBgn0086451	CG10805		CG13216	FBgn0033591	CG13216		l(2)09851	FBgn0022288	CG12792
lab	FBgn0002522	CG1264		Spn85F	FBgn0037772	CG12807		nuf	FBgn0013718	CG33991		Syngr	FBgn0033876	CG10808		Cpr47Ee	FBgn0033602	CG13222		Teh1	FBgn0037766	CG12806
olf413	FBgn0037153	CG12673		Atg10	FBgn0040780	CG12821		BG642167	FBgn0250831	CG34103		CG10809	FBgn0036052	CG10809		CG13231	FBgn0033580	CG13231		Su(var)2-HP2	FBgn0026427	CG12864
ncm	FBgn0086707	CG12750		CG12869	FBgn0033943	CG12869		CG34106	FBgn0083942	CG34106		CG10814	FBgn0033830	CG10814		CG13239	FBgn0037197	CG13239		Ir47a	FBgn0033515	CG12900
Eaf6	FBgn0035624	CG12756		CG12910	FBgn0033502	CG12910		bs	FBgn0004101	CG3411		SIFaR	FBgn0038880	CG10823		CG13251	FBgn0037014	CG13251		CG12970	FBgn0034047	CG12970
sano	FBgn0034408	CG12758		polyph	FBgn0033572	CG12943		CG34155	FBgn0083991	CG34155		Ktl	FBgn0038839	CG10830		Ccp84Ac	FBgn0004781	CG1327		tai	FBgn0041092	CG13109
RpL21	FBgn0032987	CG12775		CG13047	FBgn0036594	CG13047		CG34260	FBgn0085289	CG34260		Cont	FBgn0037240	CG1084		CG13272	FBgn0086673	CG13272		Ctl1	FBgn0035523	CG1311
Mat89Ba	FBgn0261286	CG12785		CG13049	FBgn0036592	CG13049		CG34355	FBgn0085384	CG34355		DCTN5-p25	FBgn0040228	CG10846		Prdm13	FBgn0035687	CG13296		ana3	FBgn0266111	CG13162
l(2)09851	FBgn0022288	CG12792		CG13054	FBgn0036584	CG13054		CG34370	FBgn0085399	CG34370		enc	FBgn0004875	CG10847		CG13310	FBgn0035928	CG13310		CG13197	FBgn0062449	CG13197
Su(var)2-HP2	FBgn0026427	CG12864		CG1307	FBgn0026566	CG1307		Shrm	FBgn0085408	CG34379		B52	FBgn0004587	CG10851		CG13321	FBgn0033787	CG13321		CG13203	FBgn0033628	CG13203
CG12877	FBgn0039544	CG12877		CG13083	FBgn0032789	CG13083		smal	FBgn0085409	CG34380		CG10853	FBgn0035478	CG10853		CG13323	FBgn0033788	CG13323		BBS4	FBgn0033578	CG13232
CG12885	FBgn0039523	CG12885		CG13117	FBgn0032140	CG13117		CG34384	FBgn0085413	CG34384		orb	FBgn0004882	CG10868		CG13324	FBgn0033789	CG13324		CG13295	FBgn0035674	CG13295
Caf1-105	FBgn0033526	CG12892		Nse4	FBgn0032251	CG13142		dpr12	FBgn0085414	CG34385		CG10877	FBgn0038804	CG10877		CG13330	FBgn0033848	CG13330		CG13300	FBgn0035699	CG13300
Ir47a	FBgn0033515	CG12900		CG1316	FBgn0035526	CG1316		CG34436	FBgn0085465	CG34436		Vha26	FBgn0283535	CG1088		CG13331	FBgn0033850	CG13331		dpr1	FBgn0040726	CG13439
CG12964	FBgn0034022	CG12964		CG1317	FBgn0035333	CG1317		osp	FBgn0003016	CG3479		Regnase-1	FBgn0038769	CG10889		CG13337	FBgn0033863	CG13337		CG1344	FBgn0027507	CG1344
tai	FBgn0041092	CG13109		CG13192	FBgn0033653	CG13192		Hydr2	FBgn0014906	CG3488		tou	FBgn0033636	CG10897		Cpr50Ca	FBgn0033867	CG13338		CG13449	FBgn0036520	CG13449
Ctl1	FBgn0035523	CG1311		CG13203	FBgn0033628	CG13203		Dl	FBgn0000463	CG3619		CG10898	FBgn0037911	CG10898		S-Lap7	FBgn0033868	CG13340		HGTX	FBgn0040318	CG13475
exp	FBgn0033668	CG13188		CG13248	FBgn0036984	CG13248		stc	FBgn0001978	CG3647		Der-1	FBgn0267972	CG10908		Pgcl	FBgn0011822	CG13374		CG13506	FBgn0034723	CG13506
Zip48C	FBgn0033665	CG13189		cmpy	FBgn0037015	CG13253		CG3649	FBgn0034785	CG3649		CG10910	FBgn0034289	CG10910		eIF4H2	FBgn0039797	CG1340		robo1	FBgn0005631	CG13521
CG13197	FBgn0062449	CG13197		CG13300	FBgn0035699	CG13300		a6	FBgn0023130	CG3771		Naus	FBgn0034308	CG10915		CG13407	FBgn0038931	CG13407		blow	FBgn0004133	CG1363
zfh1	FBgn0004606	CG1322		CG13321	FBgn0033787	CG13321		KaiR1D	FBgn0038837	CG3822		fj	FBgn0000658	CG10917		Gr93a	FBgn0041229	CG13417		sosie	FBgn0039232	CG13636
CG13220	FBgn0033608	CG13220		CG13324	FBgn0033789	CG13324		GlcAT-S	FBgn0032135	CG3881		PpY-55A	FBgn0003140	CG10930		lms	FBgn0034520	CG13424		Nmnat	FBgn0039254	CG13645
Cyt-c-d	FBgn0086907	CG13263		CG13331	FBgn0033850	CG13331		Su(z)2	FBgn0265623	CG3905		CG10931	FBgn0034274	CG10931		HnRNP-K	FBgn0267791	CG13425		danr	FBgn0039283	CG13651
CG13325	FBgn0033792	CG13325		CG13390	FBgn0032031	CG13390		Invadolysin	FBgn0086359	CG3953		CG10936	FBgn0034253	CG10936		dpr1	FBgn0040726	CG13439		CG13654	FBgn0039290	CG13654
Aasdh	FBgn0027780	CG13401		CG13398	FBgn0032042	CG13398		CG40191	FBgn0058191	CG40191		dpr14	FBgn0029974	CG10946		CG13457	FBgn0036482	CG13457		skl	FBgn0036786	CG13701
HnRNP-K	FBgn0267791	CG13425		CG13407	FBgn0038931	CG13407		Maf1	FBgn0267861	CG40196		CG10948	FBgn0036317	CG10948		HGTX	FBgn0040318	CG13475		CG13731	FBgn0036717	CG13731
CG13484	FBgn0036406	CG13484		Lk	FBgn0028418	CG13480		Yeti	FBgn0267398	CG40218		CG10958	FBgn0030004	CG10958		shd	FBgn0003388	CG13478		tsh	FBgn0003866	CG1374
robo1	FBgn0005631	CG13521		CG13559	FBgn0034870	CG13559		TTLL15	FBgn0037838	CG4089		nebu	FBgn0036316	CG10960		CG13500	FBgn0034683	CG13500		CG13766	FBgn0031834	CG13766
CG13531	FBgn0034786	CG13531		CG13579	FBgn0035010	CG13579		nAChRalpha6	FBgn0032151	CG4128		Corp	FBgn0030028	CG10965		CG13558	FBgn0034869	CG13558		CG13784	FBgn0031897	CG13784
Ice1	FBgn0034853	CG13550		Bet5	FBgn0260860	CG1359		beat-IIb	FBgn0038494	CG4135		Ptp69D	FBgn0014007	CG10975		CG13560	FBgn0034899	CG13560		Cow	FBgn0039054	CG13830
CG13604	FBgn0039137	CG13604		CG13607	FBgn0039151	CG13607		CG4161	FBgn0028892	CG4161		CG10979	FBgn0037379	CG10979		Bet5	FBgn0260860	CG1359		Obp56g	FBgn0034474	CG13873
CG13667	FBgn0035890	CG13667		Syx18	FBgn0039212	CG13626		lace	FBgn0002524	CG4162		g	FBgn0001087	CG10986		CG13627	FBgn0039217	CG13627		CG13917	FBgn0035237	CG13917
CG1371	FBgn0033482	CG1371		blow	FBgn0004133	CG1363		vig	FBgn0024183	CG4170		Grip91	FBgn0001612	CG10988		CG13678	FBgn0035859	CG13678		bwa	FBgn0045064	CG13969
CG13737	FBgn0036382	CG13737		danr	FBgn0039283	CG13651		CG42238	FBgn0250867	CG42238		Dap160	FBgn0023388	CG1099		CG13705	FBgn0035582	CG13705		CG13982	FBgn0031811	CG13982
tsh	FBgn0003866	CG1374		Cad96Cb	FBgn0039294	CG13664		Dscam2	FBgn0265296	CG42256		Clic	FBgn0030529	CG10997		CG13720	FBgn0035555	CG13720		LRR	FBgn0033212	CG1399
CG13766	FBgn0031834	CG13766		CG13670	FBgn0035873	CG13670		CG42260	FBgn0259145	CG42260		CG11000	FBgn0263353	CG11000		CG13731	FBgn0036717	CG13731		CG14006	FBgn0031733	CG14006
Nlg2	FBgn0031866	CG13772		CG13678	FBgn0035859	CG13678		CG42268	FBgn0259163	CG42268		CG11029	FBgn0031735	CG11029		CG13737	FBgn0036382	CG13737		CG14073	FBgn0036814	CG14073
CG13784	FBgn0031897	CG13784		CG1371	FBgn0033482	CG1371		grh	FBgn0259211	CG42311		CG1103	FBgn0037235	CG1103		CG13744	FBgn0033363	CG13744		Mkp3	FBgn0036844	CG14080
Nop56	FBgn0038964	CG13849		CG13733	FBgn0036729	CG13733		Dscam4	FBgn0263219	CG42330		Kdm2	FBgn0037659	CG11033		CG13747	FBgn0033364	CG13747		CG14105	FBgn0036359	CG14105
CG13850	FBgn0038961	CG13850		CG13747	FBgn0033364	CG13747		Pka-R1	FBgn0259243	CG42341		Ufl1	FBgn0037467	CG1104		CG13847	FBgn0038967	CG13847		CG14115	FBgn0036343	CG14115
CG13855	FBgn0038960	CG13855		CG13801	FBgn0035332	CG13801		brp	FBgn0259246	CG42344		sv	FBgn0005561	CG11049		Def	FBgn0010385	CG1385		CG14132	FBgn0040817	CG14132
Dci	FBgn0035169	CG13890		CG13810	FBgn0035313	CG13810		CG4238	FBgn0031384	CG4238		CG11050	FBgn0031836	CG11050		antdh	FBgn0026268	CG1386		dpr6	FBgn0040823	CG14162
CG13917	FBgn0035237	CG13917		Nop56	FBgn0038964	CG13849		Sfp77F	FBgn0259972	CG42482		Gel	FBgn0010225	CG1106		CG13884	FBgn0035138	CG13884		CG14184	FBgn0036932	CG14184
DIP-eta	FBgn0031725	CG14010		Def	FBgn0010385	CG1385		CG42493	FBgn0260007	CG42493		GM130	FBgn0034697	CG11061		tor	FBgn0003733	CG1389		CG14207	FBgn0031037	CG14207
vri	FBgn0016076	CG14029		CG13850	FBgn0038961	CG13850		Mp	FBgn0260660	CG42543		Actbeta	FBgn0024913	CG11062		GC	FBgn0035245	CG13927		CG14280	FBgn0038695	CG14280
CG1407	FBgn0033474	CG1407		CG13857	FBgn0038958	CG13857		CG42663	FBgn0261545	CG42663		Ube4A	FBgn0028467	CG11070		CG13931	FBgn0035258	CG13931		Mef2	FBgn0011656	CG1429
CG14074	FBgn0036818	CG14074		SA-2	FBgn0043865	CG13916		Msp300	FBgn0261836	CG42768		pk	FBgn0003090	CG11084		Gr98a	FBgn0039520	CG13976		CG14321	FBgn0038540	CG14321
Mkp3	FBgn0036844	CG14080		CG13917	FBgn0035237	CG13917		aPKC	FBgn0261854	CG42783		Gadd45	FBgn0033153	CG11086		CG13982	FBgn0031811	CG13982		side-IV	FBgn0038156	CG14372
CG14100	FBgn0036889	CG14100		CG13921	FBgn0035267	CG13921		CG42813	FBgn0261995	CG42813		CG11089	FBgn0039241	CG11089		CG13983	FBgn0031792	CG13983		CG14414	FBgn0030571	CG14414
Use1	FBgn0035965	CG14181		Cpr62Bb	FBgn0035280	CG13935		Rbp	FBgn0262483	CG43073		Wdr33	FBgn0046222	CG1109		Muc26B	FBgn0040950	CG13990		wat	FBgn0039620	CG1443
CG14184	FBgn0036932	CG14184		CG13982	FBgn0031811	CG13982		cic	FBgn0262582	CG43122		dsx	FBgn0000504	CG11094		CG14011	FBgn0031722	CG14011		CG14431	FBgn0029922	CG14431
CG14252	FBgn0039462	CG14252		Cul5	FBgn0039632	CG1401		Nuak	FBgn0262617	CG43143		CG11095	FBgn0030528	CG11095		CARPA	FBgn0029962	CG1402		CG14441	FBgn0029895	CG14441
CG14257	FBgn0039479	CG14257		CG14015	FBgn0031716	CG14015		CG43168	FBgn0262787	CG43168		Mes2	FBgn0037207	CG11100		CG14020	FBgn0031707	CG14020		CG14450	FBgn0037184	CG14450
SecS	FBgn0037347	CG1427		fusl	FBgn0031702	CG14021		lute	FBgn0262871	CG43226		pwn	FBgn0003174	CG11101		CG14024	FBgn0031697	CG14024		poe	FBgn0011230	CG14472
Mef2	FBgn0011656	CG1429		CG14074	FBgn0036818	CG14074		milt	FBgn0262872	CG43227		Dhx15	FBgn0033160	CG11107		SP555	FBgn0260470	CG14041		olf186-M	FBgn0015522	CG14489
Epg5	FBgn0038651	CG14299		CG14100	FBgn0036889	CG14100		CG43231	FBgn0262876	CG43231		CG11112	FBgn0033164	CG11112		beat-VI	FBgn0039584	CG14064		jus	FBgn0039647	CG14509
CG14322	FBgn0038532	CG14322		CG14118	FBgn0036323	CG14118		CG43237	FBgn0262882	CG43237		Mink	FBgn0039250	CG11120		CG14095	FBgn0036870	CG14095		DIP-gamma	FBgn0039617	CG14521
haf	FBgn0261509	CG14351		CG14147	FBgn0036112	CG14147		cnc	FBgn0262975	CG43286		so	FBgn0003460	CG11121		CG14118	FBgn0036323	CG14118		Usp2	FBgn0031187	CG14619
Wdr92	FBgn0036771	CG14353		CG14182	FBgn0036922	CG14182		cpo	FBgn0263995	CG43738		CG11122	FBgn0030266	CG11122		CG14186	FBgn0036935	CG14186		DAAM	FBgn0025641	CG14622
side-IV	FBgn0038156	CG14372		CG14184	FBgn0036932	CG14184		GluRIB	FBgn0264000	CG43743		CG11123	FBgn0033169	CG11123		CG14221	FBgn0031042	CG14221		ey	FBgn0005558	CG1464
CG14450	FBgn0037184	CG14450		CG14247	FBgn0039454	CG14247		dysc	FBgn0264006	CG43749		CG11131	FBgn0037204	CG11131		CG14227	FBgn0031058	CG14227		CG14669	FBgn0037326	CG14669
poe	FBgn0011230	CG14472		CG14252	FBgn0039462	CG14252		sli	FBgn0264089	CG43758		BoYb	FBgn0037205	CG11133		mst	FBgn0020272	CG1424		Fer2LCH	FBgn0015221	CG1469
Inx3	FBgn0265274	CG1448		CG1428	FBgn0032967	CG1428		CG4390	FBgn0038771	CG4390		CG11134	FBgn0030518	CG11134		CG14257	FBgn0039479	CG14257		Gycbeta100B	FBgn0013973	CG1470
zfh2	FBgn0004607	CG1449		CG14280	FBgn0038695	CG14280		btsz	FBgn0266756	CG44012		Lrt	FBgn0034540	CG11136		CG14265	FBgn0040393	CG14265		CG14721	FBgn0037942	CG14721
yem	FBgn0005596	CG14513		CG14292	FBgn0038658	CG14292		RapGAP1	FBgn0264895	CG44086		Pits	FBgn0030400	CG11138		CG14277	FBgn0032008	CG14277		CG14743	FBgn0033326	CG14743
Herp	FBgn0031950	CG14536		Epg5	FBgn0038651	CG14299		CG44098	FBgn0264907	CG44098		p47	FBgn0033179	CG11139		CG14301	FBgn0038632	CG14301		CG14762	FBgn0033250	CG14762
CG14562	FBgn0037142	CG14562		CG14316	FBgn0038567	CG14316		pHCl-1	FBgn0264908	CG44099		Aldh-III	FBgn0010548	CG11140		CG14323	FBgn0038529	CG14323		Mur2B	FBgn0025390	CG14796
CG14657	FBgn0037282	CG14657		CG14321	FBgn0038540	CG14321		Src42A	FBgn0264959	CG44128		CG11141	FBgn0033177	CG11141		CG14331	FBgn0038510	CG14331		Der-2	FBgn0038438	CG14899
CG14669	FBgn0037326	CG14669		CG14327	FBgn0038526	CG14327		CG44153	FBgn0265002	CG44153		Gyf	FBgn0039936	CG11148		CG14340	FBgn0031302	CG14340		crol	FBgn0020309	CG14938
CG14715	FBgn0037930	CG14715		CG14380	FBgn0038124	CG14380		Atf-2	FBgn0265193	CG44246		Vps37B	FBgn0037299	CG1115		CG14355	FBgn0038208	CG14355		CycY	FBgn0032378	CG14939
CG14721	FBgn0037942	CG14721		CG14383	FBgn0038102	CG14383		CG44355	FBgn0265455	CG44355		Sox102F	FBgn0039938	CG11153		CG14362	FBgn0038186	CG14362		CG14990	FBgn0035496	CG14990
CG14763	FBgn0033243	CG14763		beat-Vc	FBgn0038084	CG14390		CG44476	FBgn0265669	CG44476		mus101	FBgn0002878	CG11156		Cyp4c3	FBgn0015032	CG1438		Chd64	FBgn0035499	CG14996
CG14764	FBgn0033236	CG14764		CG14395	FBgn0038073	CG14395		CG4477	FBgn0035971	CG4477		SmydA-4	FBgn0030257	CG11160		CG14395	FBgn0038073	CG14395		fw	FBgn0001083	CG1500
CG14823	FBgn0035734	CG14823		CG14402	FBgn0032894	CG14402		Tgs1	FBgn0266195	CG44890		CG11168	FBgn0039249	CG11168		CG14397	FBgn0032914	CG14397		Teh4	FBgn0035504	CG15003
CG14830	FBgn0035755	CG14830		CG14455	FBgn0037175	CG14455		Pde8	FBgn0266377	CG45019		CG11170	FBgn0034705	CG11170		CG1441	FBgn0033464	CG1441		Pur-alpha	FBgn0022361	CG1507
AdamTS-A	FBgn0286071	CG14869		CG14459	FBgn0037171	CG14459		CG4502	FBgn0031896	CG4502		NFAT	FBgn0030505	CG11172		CG14414	FBgn0030571	CG14414		Mctp	FBgn0034389	CG15078
CG14882	FBgn0038429	CG14882		CG14478	FBgn0028953	CG14478		CG45045	FBgn0266405	CG45045		Rcd6	FBgn0034530	CG11175		CG14420	FBgn0029643	CG14420		CG15080	FBgn0034391	CG15080
spz4	FBgn0032362	CG14928		Apc	FBgn0015589	CG1451		sima	FBgn0266411	CG45051		CG11178	FBgn0030499	CG11178		wat	FBgn0039620	CG1443		Phb2	FBgn0010551	CG15081
crol	FBgn0020309	CG14938		DIP-gamma	FBgn0039617	CG14521		Dyrk2	FBgn0016930	CG4551		Gnf1	FBgn0004913	CG1119		CG14445	FBgn0029851	CG14445		CG15082	FBgn0034397	CG15082
CycY	FBgn0032378	CG14939		CG14535	FBgn0031955	CG14535		Tpr2	FBgn0032586	CG4599		PIG-T	FBgn0030035	CG11190		CG14502	FBgn0034321	CG14502		ena	FBgn0000578	CG15112
esc	FBgn0000588	CG14941		CG14551	FBgn0039408	CG14551		CG46025	FBgn0267689	CG46025		CG11191	FBgn0033249	CG11191		CG14507	FBgn0039655	CG14507		rdo	FBgn0243486	CG15151
hob	FBgn0035420	CG14967		abs	FBgn0015331	CG14637		CG46308	FBgn0284224	CG46308		Hey	FBgn0027788	CG11194		Nepl19	FBgn0039612	CG14523		PCB	FBgn0027580	CG1516
mge	FBgn0035473	CG14981		lost	FBgn0263594	CG14648		CG46339	FBgn0285963	CG46339		Dic3	FBgn0033248	CG11196		TwdlE	FBgn0031957	CG14534		CG15160	FBgn0032688	CG15160
CG14985	FBgn0035482	CG14985		CG14712	FBgn0037924	CG14712		MICU3	FBgn0038735	CG4662		ACC	FBgn0033246	CG11198		CG14551	FBgn0039408	CG14551		Osi19	FBgn0037429	CG15189
CG15011	FBgn0035518	CG15011		CG14742	FBgn0037997	CG14742		Tengl4	FBgn0037857	CG4683		Liprin-alpha	FBgn0046704	CG11199		CG14606	FBgn0037485	CG14606		CG15236	FBgn0033108	CG15236
dyl	FBgn0066365	CG15013		CG14760	FBgn0033277	CG14760		Wnt4	FBgn0010453	CG4698		IntS10	FBgn0035462	CG1120		thw	FBgn0037487	CG14608		Tim17b2	FBgn0020371	CG15257
Cip4	FBgn0035533	CG15015		CG14762	FBgn0033250	CG14762		Rcd2	FBgn0037012	CG4786		org-1	FBgn0021767	CG11202		CG14609	FBgn0037483	CG14609		CG15270	FBgn0028879	CG15270
Mctp	FBgn0034389	CG15078		CG14853	FBgn0038246	CG14853		kek2	FBgn0015400	CG4977		ppk6	FBgn0034489	CG11209		Usp2	FBgn0031187	CG14619		CG1532	FBgn0031143	CG1532
Phb2	FBgn0010551	CG15081		CG14881	FBgn0038425	CG14881		CLIP-190	FBgn0020503	CG5020		Tmem63	FBgn0033259	CG11210		CG14657	FBgn0037282	CG14657		tutl	FBgn0010473	CG15427
List	FBgn0034381	CG15088		Pak3	FBgn0044826	CG14895		MtnC	FBgn0038790	CG5097		Ptr	FBgn0262867	CG11212		CG14658	FBgn0037283	CG14658		jb	FBgn0031104	CG15460
CG15099	FBgn0034400	CG15099		Der-2	FBgn0038438	CG14899		l(3)psg2	FBgn0035617	CG5146		Cp38	FBgn0000360	CG11213		CG14659	FBgn0037284	CG14659		mys	FBgn0004657	CG1560
ena	FBgn0000578	CG15112		Asciz	FBgn0035407	CG14962		Dad	FBgn0020493	CG5201		PIP82	FBgn0024943	CG11219		CG14676	FBgn0037388	CG14676		CG15605	FBgn0034196	CG15605
Cul2	FBgn0032956	CG1512		mge	FBgn0035473	CG14981		sit	FBgn0038986	CG5278		CG11251	FBgn0036346	CG11251		Cyp12e1	FBgn0037817	CG14680		CG15628	FBgn0031632	CG15628
CG15127	FBgn0040730	CG15127		CG14982	FBgn0035477	CG14982		Gdh	FBgn0001098	CG5320		Adk2	FBgn0036337	CG11255		Mrp4	FBgn0263316	CG14709		cv-2	FBgn0000395	CG15671
CG1513	FBgn0033463	CG1513		Ack	FBgn0028484	CG14992		Pex19	FBgn0032407	CG5325		CG11257	FBgn0034442	CG11257		CG14715	FBgn0037930	CG14715		RpS30	FBgn0038834	CG15697
MESR3	FBgn0032694	CG15162		Cpr64Aa	FBgn0035510	CG15006		Tl	FBgn0262473	CG5490		Srrm1	FBgn0036340	CG11274		CG14722	FBgn0037943	CG14722		CG15728	FBgn0030409	CG15728
WASp	FBgn0024273	CG1520		ImpL2	FBgn0001257	CG15009		Myo95E	FBgn0039157	CG5501		CG11279	FBgn0036342	CG11279		Tk	FBgn0037976	CG14734		CG15747	FBgn0030474	CG15747
gammaCOP	FBgn0028968	CG1528		CG15011	FBgn0035518	CG15011		Sce	FBgn0003330	CG5595		trn	FBgn0010452	CG11280		CG14760	FBgn0033277	CG14760		zip	FBgn0265434	CG15792
CG15387	FBgn0031403	CG15387		Mctp	FBgn0034389	CG15078		Atpalpha	FBgn0002921	CG5670		caps	FBgn0023095	CG11282		bnk	FBgn0004389	CG1480		CG15803	FBgn0038606	CG15803
tmod	FBgn0082582	CG1539		CG15130	FBgn0032860	CG15130		chico	FBgn0024248	CG5686		CAH3	FBgn0030056	CG11284		CG14826	FBgn0035750	CG14826		Apoltp	FBgn0032136	CG15828
tutl	FBgn0010473	CG15427		rdo	FBgn0243486	CG15151		CaBP1	FBgn0025678	CG5809		CG1129	FBgn0037279	CG1129		CG14837	FBgn0035797	CG14837		CG15894	FBgn0029864	CG15894
CG15431	FBgn0031602	CG15431		CG15153	FBgn0032663	CG15153		Prx3	FBgn0038519	CG5826		enok	FBgn0034975	CG11290		CG14840	FBgn0038217	CG14840		Cerk	FBgn0037315	CG16708
TTLL12	FBgn0033225	CG1550		CG15160	FBgn0032688	CG15160		Men-b	FBgn0029155	CG5889		CG11298	FBgn0034721	CG11298		CG14856	FBgn0038261	CG14856		Spn	FBgn0010905	CG16757
Rpp14b	FBgn0039744	CG15526		WASp	FBgn0024273	CG1520		rgn	FBgn0261258	CG6014		scrt	FBgn0004880	CG1130		Der-2	FBgn0038438	CG14899		fz3	FBgn0027343	CG16785
hdc	FBgn0010113	CG15532		Or22c	FBgn0026396	CG15377		CG6055	FBgn0031918	CG6055		TM4SF	FBgn0020372	CG11303		CG14915	FBgn0032335	CG14915		p23	FBgn0037728	CG16817
CG15545	FBgn0039806	CG15545		tmod	FBgn0082582	CG1539		Cyp28d2	FBgn0031688	CG6081		Alg11	FBgn0037108	CG11306		AstC	FBgn0032336	CG14919		CG16820	FBgn0032495	CG16820
Osi24	FBgn0037409	CG15589		tutl	FBgn0010473	CG15427		Ser	FBgn0004197	CG6127		Npc2h	FBgn0039801	CG11315		CG14947	FBgn0032406	CG14947		CG16863	FBgn0028931	CG16863
Ehbp1	FBgn0034180	CG15609		CG15498	FBgn0038892	CG15498		tws	FBgn0004889	CG6235		CG11322	FBgn0031856	CG11322		CG14949	FBgn0035358	CG14949		Vajk3	FBgn0028544	CG16884
MESK2	FBgn0043070	CG15669		Or83c	FBgn0037399	CG15581		CG6329	FBgn0033872	CG6329		homer	FBgn0025777	CG11324		Asciz	FBgn0035407	CG14962		lz	FBgn0002576	CG1689
CG15715	FBgn0036538	CG15715		Osi9	FBgn0037416	CG15592		Aps	FBgn0036111	CG6391		AkhR	FBgn0025595	CG11325		CG14963	FBgn0035409	CG14963		eloF	FBgn0037762	CG16905
mRpL52	FBgn0033208	CG1577		CG15651	FBgn0034567	CG15651		CG6424	FBgn0028494	CG6424		Tsp	FBgn0031850	CG11326		CG14964	FBgn0035410	CG14964		key	FBgn0041205	CG16910
zip	FBgn0265434	CG15792		RpS30	FBgn0038834	CG15697		qua	FBgn0003187	CG6433		Nhe3	FBgn0028703	CG11328		CG14985	FBgn0035482	CG14985		Ref2	FBgn0032439	CG17031
Pka-R2	FBgn0022382	CG15862		CG15710	FBgn0034120	CG15710		plum	FBgn0039431	CG6490		opa	FBgn0003002	CG1133		nyo	FBgn0039852	CG1499		klar	FBgn0001316	CG17046
CG15905	FBgn0034462	CG15905		CG16704	FBgn0031558	CG16704		TfIIFbeta	FBgn0010421	CG6538		Loxl1	FBgn0039848	CG11335		Cpr64Aa	FBgn0035510	CG15006		Peritrophin-A	FBgn0022770	CG17058
CG1603	FBgn0033185	CG1603		SPE	FBgn0039102	CG16705		glec	FBgn0015229	CG6575		PNPase	FBgn0039846	CG11337		ImpL2	FBgn0001257	CG15009		CG17065	FBgn0031099	CG17065
CG1607	FBgn0039844	CG1607		St2	FBgn0037665	CG16733		CG6629	FBgn0037860	CG6629		Mul1	FBgn0035483	CG1134		dyl	FBgn0066365	CG15013		Hcf	FBgn0039904	CG1710
Gcn2	FBgn0019990	CG1609		slp1	FBgn0003430	CG16738		CG6700	FBgn0032305	CG6700		CG11342	FBgn0035537	CG11342		CG1504	FBgn0031100	CG1504		Lip2	FBgn0024740	CG17116
hebe	FBgn0033448	CG1623		Or85f	FBgn0037685	CG16755		RasGAP1	FBgn0004390	CG6721		CG11345	FBgn0035546	CG11345		CG15040	FBgn0030940	CG15040		hth	FBgn0001235	CG17117
Spn	FBgn0010905	CG16757		CG16779	FBgn0037698	CG16779		Wdr81	FBgn0032395	CG6734		DOR	FBgn0035542	CG11347		CG15042	FBgn0030937	CG15042		CG17124	FBgn0032297	CG17124
Alp12	FBgn0032779	CG16771		CG16791	FBgn0038881	CG16791		vers	FBgn0011335	CG6801		CG11349	FBgn0035550	CG11349		CG15059	FBgn0030905	CG15059		CG17145	FBgn0036953	CG17145
CG16779	FBgn0037698	CG16779		Hr51	FBgn0034012	CG16801		foi	FBgn0024236	CG6817		jim	FBgn0027339	CG11352		CG15080	FBgn0034391	CG15080		CG17162	FBgn0039944	CG17162
CG16791	FBgn0038881	CG16791		roq	FBgn0036621	CG16807		ergic53	FBgn0035909	CG6822		Lim1	FBgn0026411	CG11354		List	FBgn0034381	CG15088		CG17193	FBgn0040571	CG17193
TTLL4A	FBgn0026147	CG16833		CG16815	FBgn0032491	CG16815		rhea	FBgn0260442	CG6831		CG11370	FBgn0037181	CG11370		tn	FBgn0265356	CG15105		Or94a	FBgn0039033	CG17241
Adat1	FBgn0028658	CG16889		p23	FBgn0037728	CG16817		Myo28B1	FBgn0040299	CG6976		CG11377	FBgn0031217	CG11377		CG15109	FBgn0034416	CG15109		Fbp1	FBgn0000639	CG17285
CG16890	FBgn0028932	CG16890		CG16826	FBgn0032505	CG16826		VhaPPA1-1	FBgn0028662	CG7007		CG11380	FBgn0040359	CG11380		CG15115	FBgn0034413	CG15115		SNF4Agamma	FBgn0264357	CG17299
CG16908	FBgn0037741	CG16908		NimB5	FBgn0028936	CG16873		CG7011	FBgn0036489	CG7011		CG11382	FBgn0040367	CG11382		glob2	FBgn0250846	CG15180		Lk6	FBgn0017581	CG17342
Eps-15	FBgn0035060	CG16932		NimC4	FBgn0260011	CG16876		Rab3-GAP	FBgn0027505	CG7061		CG11396	FBgn0037022	CG11396		CG15186	FBgn0037448	CG15186		CG17359	FBgn0036396	CG17359
CG16935	FBgn0033883	CG16935		Vajk2	FBgn0032538	CG16885		Sar1	FBgn0038947	CG7073		CG11403	FBgn0026876	CG11403		Osi19	FBgn0037429	CG15189		CG17362	FBgn0036393	CG17362
Sf3a1	FBgn0266917	CG16941		Vajk1	FBgn0028938	CG16886		Mkrn1	FBgn0029152	CG7184		CG11406	FBgn0034990	CG11406		CG15279	FBgn0028886	CG15279		CG17377	FBgn0031859	CG17377
klar	FBgn0001316	CG17046		sqd	FBgn0263396	CG16901		CG7231	FBgn0031968	CG7231		uri	FBgn0035025	CG11416		CG15322	FBgn0031088	CG15322		MED21	FBgn0040020	CG17397
mars	FBgn0033845	CG17064		key	FBgn0041205	CG16910		Toll-6	FBgn0036494	CG7250		png	FBgn0000826	CG11420		karr	FBgn0040784	CG15323		Uba5	FBgn0030305	CG1749
pnt	FBgn0003118	CG17077		Sf3a1	FBgn0266917	CG16941		Wdr62	FBgn0031374	CG7337		rb	FBgn0003210	CG11427		CG15333	FBgn0029989	CG15333		sca	FBgn0003326	CG17579
CG17078	FBgn0086855	CG17078		CG16959	FBgn0036481	CG16959		CG7339	FBgn0036188	CG7339		CG11437	FBgn0037165	CG11437		Cp7Fc	FBgn0014466	CG15351		S6kII	FBgn0262866	CG17596
cos	FBgn0000352	CG1708		CG16986	FBgn0035356	CG16986		RFeSP	FBgn0021906	CG7361		laza	FBgn0037163	CG11440		CG1537	FBgn0030260	CG1537		dia	FBgn0011202	CG1768
Hipk	FBgn0035142	CG17090		Ref2	FBgn0032439	CG17031		TM9SF4	FBgn0028541	CG7364		Rilpl	FBgn0024985	CG11448		CG15382	FBgn0031393	CG15382		CG17683	FBgn0262115	CG17683
Hcf	FBgn0039904	CG1710		Inx6	FBgn0027107	CG17063		Phs	FBgn0036522	CG7372		CG11449	FBgn0037162	CG11449		CG15395	FBgn0031440	CG15395		CG17716	FBgn0000633	CG17716
cwo	FBgn0259938	CG17100		pnt	FBgn0003118	CG17077		Oct-TyrR	FBgn0004514	CG7485		ND-15	FBgn0031228	CG11455		CG15406	FBgn0031517	CG15406		ZnT63C	FBgn0035432	CG17723
hth	FBgn0001235	CG17117		cos	FBgn0000352	CG1708		CG7506	FBgn0035805	CG7506		CG11456	FBgn0037031	CG11456		tutl	FBgn0010473	CG15427		Dscam1	FBgn0033159	CG17800
CG17121	FBgn0039043	CG17121		mthl9	FBgn0035131	CG17084		Src64B	FBgn0262733	CG7524		CG1146	FBgn0035346	CG1146		CG15452	FBgn0031130	CG15452		rdgBbeta	FBgn0027872	CG17818
CG17127	FBgn0032299	CG17127		Vha100-1	FBgn0028671	CG1709		CG7565	FBgn0035833	CG7565		mRpL10	FBgn0031231	CG11488		CG15497	FBgn0038894	CG15497		Uba1	FBgn0023143	CG1782
grp	FBgn0261278	CG17161		CG17119	FBgn0039045	CG17119		QIL1	FBgn0036726	CG7603		br	FBgn0283451	CG11491		CG15506	FBgn0039686	CG15506		14-3-3zeta	FBgn0004907	CG17870
CG17230	FBgn0046225	CG17230		CG17127	FBgn0032299	CG17127		CG7653	FBgn0028935	CG7653		Osi3	FBgn0037411	CG1150		CG15517	FBgn0039718	CG15517		CG17883	FBgn0040005	CG17883
Ccdc85	FBgn0031488	CG17265		CG17134	FBgn0032304	CG17134		Cpr78Cb	FBgn0037068	CG7663		svp	FBgn0003651	CG11502		CG15543	FBgn0039799	CG15543		BuGZ	FBgn0032600	CG17912
Bdbt	FBgn0038857	CG17282		CG17145	FBgn0036953	CG17145		CG7694	FBgn0038627	CG7694		Ptp99A	FBgn0004369	CG11516		CG15545	FBgn0039806	CG15545		MED26	FBgn0039923	CG1793
SNF4Agamma	FBgn0264357	CG17299		CG17147	FBgn0260393	CG17147		Mekk1	FBgn0024329	CG7717		Asator	FBgn0039908	CG11533		CG15548	FBgn0039812	CG15548		Mmp2	FBgn0033438	CG1794
VhaSFD	FBgn0027779	CG17332		ssp	FBgn0036248	CG17153		rogdi	FBgn0036697	CG7725		CG11537	FBgn0035400	CG11537		ppk24	FBgn0039839	CG15555		comm	FBgn0010105	CG17943
Lk6	FBgn0017581	CG17342		cpb	FBgn0011570	CG17158		kug	FBgn0261574	CG7749		CG11539	FBgn0039859	CG11539		Osi9	FBgn0037416	CG15592		ras	FBgn0003204	CG1799
CG17343	FBgn0032751	CG17343		Arfip	FBgn0037884	CG17184		ppl	FBgn0027945	CG7758		kermit	FBgn0010504	CG11546		Osi13	FBgn0037422	CG15595		SoxN	FBgn0029123	CG18024
drl	FBgn0015380	CG17348		CG17199	FBgn0038775	CG17199		TfAP-2	FBgn0261953	CG7807		Osi14	FBgn0040279	CG1155		CG15597	FBgn0037420	CG15597		shot	FBgn0013733	CG18076
SppL	FBgn0039381	CG17370		KP78b	FBgn0026063	CG17216		Axn	FBgn0026597	CG7926		CG11550	FBgn0039864	CG11550		Elba3	FBgn0031621	CG15634		CG18135	FBgn0036837	CG18135
Achl	FBgn0033936	CG17386		pros	FBgn0004595	CG17228		CG8027	FBgn0033392	CG8027		ind	FBgn0025776	CG11551		RpS30	FBgn0038834	CG15697		Octalpha2R	FBgn0038653	CG18208
MED21	FBgn0040020	CG17397		CG17230	FBgn0046225	CG17230		CG8141	FBgn0038125	CG8141		Rph	FBgn0030230	CG11556		wisp	FBgn0260780	CG15737		alt	FBgn0038535	CG18212
Spf45	FBgn0086683	CG17540		Or94a	FBgn0039033	CG17241		unc-5	FBgn0034013	CG8166		Cpr	FBgn0015623	CG11567		Cpr12A	FBgn0030494	CG15757		CG18273	FBgn0029525	CG18273
dnt	FBgn0024245	CG17559		CG17242	FBgn0250841	CG17242		Khc-73	FBgn0019968	CG8183		arm	FBgn0000117	CG11579		CG15800	FBgn0034904	CG15800		dre4	FBgn0002183	CG1828
cad	FBgn0000251	CG1759		CG17298	FBgn0038879	CG17298		RNaseX25	FBgn0010406	CG8194		CG11581	FBgn0030540	CG11581		CG15865	FBgn0015336	CG15865		Clamp	FBgn0032979	CG1832
Taf1	FBgn0010355	CG17603		SNF4Agamma	FBgn0264357	CG17299		tun	FBgn0034046	CG8253		CG11583	FBgn0035524	CG11583		CG15870	FBgn0033798	CG15870		Eip93F	FBgn0264490	CG18389
EcR	FBgn0000546	CG1765		Lk6	FBgn0017581	CG17342		Srp9	FBgn0035827	CG8268		CG11586	FBgn0035520	CG11586		CG15873	FBgn0035003	CG15873		Mst98Cb	FBgn0004171	CG18396
fz	FBgn0001085	CG17697		CG17377	FBgn0031859	CG17377		Pde6	FBgn0038237	CG8279		CG11588	FBgn0036221	CG11588		CG15888	FBgn0038131	CG15888		InR	FBgn0283499	CG18402
dap	FBgn0010316	CG1772		jigr1	FBgn0039350	CG17383		Snx6	FBgn0032005	CG8282		Dpy-30L2	FBgn0035491	CG11591		CG15923	FBgn0038814	CG15923		ph-p	FBgn0004861	CG18412
ZnT63C	FBgn0035432	CG17723		CG17404	FBgn0038001	CG17404		RpS23	FBgn0033912	CG8415		CG11593	FBgn0035488	CG11593		Parp16	FBgn0034129	CG15925		unc80	FBgn0039536	CG18437
pho	FBgn0002521	CG17743		p120ctn	FBgn0260799	CG17484		Not3	FBgn0033029	CG8426		CG11596	FBgn0023522	CG11596		CG1640	FBgn0030478	CG1640		gprs	FBgn0024232	CG18471
CG17746	FBgn0035425	CG17746		Uba5	FBgn0030305	CG1749		spin	FBgn0086676	CG8428		CG11600	FBgn0038068	CG11600		unpg	FBgn0015561	CG1650		Dop1R2	FBgn0266137	CG18741
Ccs	FBgn0010531	CG17753		pds5	FBgn0260012	CG17509		Lis-1	FBgn0015754	CG8440		H2.0	FBgn0001170	CG11607		Obp19d	FBgn0011280	CG1668		Gdap2	FBgn0042135	CG18812
CG17768	FBgn0032240	CG17768		CG17528	FBgn0261387	CG17528		GluRIA	FBgn0004619	CG8442		CG11608	FBgn0038069	CG11608		slp1	FBgn0003430	CG16738		CG1894	FBgn0039585	CG1894
Golgin84	FBgn0039188	CG17785		CG17549	FBgn0032774	CG17549		TBC1D5	FBgn0038129	CG8449		nkd	FBgn0002945	CG11614		CG16739	FBgn0034505	CG16739		CG1907	FBgn0039674	CG1907
CG17786	FBgn0039167	CG17786		CG17571	FBgn0259998	CG17571		fra	FBgn0011592	CG8581		Rlip	FBgn0026056	CG11622		CG16743	FBgn0032322	CG16743		faf	FBgn0005632	CG1945
Uba1	FBgn0023143	CG1782		cad	FBgn0000251	CG1759		Ih	FBgn0263397	CG8585		TRAM	FBgn0040340	CG11642		fz3	FBgn0027343	CG16785		CG1965	FBgn0037466	CG1965
inv	FBgn0001269	CG17835		CG17612	FBgn0031597	CG17612		Toll-7	FBgn0034476	CG8595		Abd-B	FBgn0000015	CG11648		CG16813	FBgn0032490	CG16813		RhoGAP100F	FBgn0039883	CG1976
Xrp1	FBgn0261113	CG17836		Eglp2	FBgn0034883	CG17664		CG8617	FBgn0033925	CG8617		CG11658	FBgn0036196	CG11658		CG16815	FBgn0032491	CG16815		Taf3	FBgn0026262	CG2009
Syp	FBgn0038826	CG17838		dia	FBgn0011202	CG1768		CG8630	FBgn0038130	CG8630		Nc73EF	FBgn0010352	CG11661		p23	FBgn0037728	CG16817		Ubc6	FBgn0004436	CG2013
14-3-3zeta	FBgn0004907	CG17870		CG17683	FBgn0262115	CG17683		CG8635	FBgn0033317	CG8635		CG11664	FBgn0040341	CG11664		NimB5	FBgn0028936	CG16873		CG2017	FBgn0037391	CG2017
CG17883	FBgn0040005	CG17883		CG17746	FBgn0035425	CG17746		Cyp6a14	FBgn0033302	CG8687		Mal-A7	FBgn0033296	CG11669		Vajk3	FBgn0028544	CG16884		Nrd1	FBgn0030344	CG2025
Pdp1	FBgn0016694	CG17888		Peritrophin-15a	FBgn0040959	CG17814		CG8765	FBgn0036900	CG8765		CG11674	FBgn0030551	CG11674		CG1690	FBgn0033442	CG1690		CSN7	FBgn0028836	CG2038
CG17906	FBgn0032086	CG17906		Slip1	FBgn0024728	CG1783		CG8768	FBgn0033769	CG8768		mle	FBgn0002774	CG11680		CG16964	FBgn0032385	CG16964		Ser7	FBgn0019929	CG2045
comm	FBgn0010105	CG17943		Syp	FBgn0038826	CG17838		Rnf146	FBgn0036897	CG8786		CG11694	FBgn0037571	CG11694		CG16995	FBgn0031412	CG16995		mod	FBgn0002780	CG2050
pasha	FBgn0039861	CG1800		FIG4	FBgn0031611	CG17840		muskelin	FBgn0033757	CG8811		Mob2	FBgn0259481	CG11711		Phae2	FBgn0263235	CG16997		CG2059	FBgn0029942	CG2059
CG18011	FBgn0033491	CG18011		Or35a	FBgn0028946	CG17868		CG9107	FBgn0031764	CG9107		CG1172	FBgn0264712	CG1172		CG17002	FBgn0033122	CG17002		aly	FBgn0004372	CG2075
Alg1	FBgn0038552	CG18012		CG17883	FBgn0040005	CG17883		tfc	FBgn0035199	CG9134		CG11722	FBgn0037777	CG11722		CG17030	FBgn0035584	CG17030		CG2082	FBgn0027608	CG2082
Psf2	FBgn0261976	CG18013		BuGZ	FBgn0032600	CG17912		312	FBgn0029514	CG9166		l(1)G0004	FBgn0027334	CG11738		Ref2	FBgn0032439	CG17031		Sec8	FBgn0266672	CG2095
Eip78C	FBgn0004865	CG18023		Mhc	FBgn0264695	CG17927		CG9171	FBgn0031738	CG9171		Sfxn1-3	FBgn0037239	CG11739		klar	FBgn0001316	CG17046		Pgant6	FBgn0035375	CG2103
shot	FBgn0013733	CG18076		Ugt37D1	FBgn0040260	CG17932		Ptp61F	FBgn0267487	CG9181		Kap3	FBgn0028421	CG11759		CG17047	FBgn0033827	CG17047		CPT2	FBgn0035383	CG2107
CG18081	FBgn0036537	CG18081		Mmp2	FBgn0033438	CG1794		CG9265	FBgn0032910	CG9265		Obp84a	FBgn0011282	CG1176		Inx6	FBgn0027107	CG17063		Mccc1	FBgn0039877	CG2118
CG1815	FBgn0039863	CG1815		comm	FBgn0010105	CG17943		Pomp	FBgn0032884	CG9324		CG11760	FBgn0037615	CG11760		CG17127	FBgn0032299	CG17127		aralar1	FBgn0028646	CG2139
Naa60	FBgn0036039	CG18177		Eip78C	FBgn0004865	CG18023		CG9328	FBgn0032886	CG9328		lin	FBgn0002552	CG11770		CG17134	FBgn0032304	CG17134		Rga	FBgn0017550	CG2161
Dg	FBgn0034072	CG18250		SoxN	FBgn0029123	CG18024		CG9395	FBgn0032506	CG9395		CG11779	FBgn0038683	CG11779		pyx	FBgn0035113	CG17142		CG2162	FBgn0035388	CG2162
CG18343	FBgn0033683	CG18343		shot	FBgn0013733	CG18076		jing	FBgn0086655	CG9397		beta4GalT7	FBgn0039258	CG11780		CG17145	FBgn0036953	CG17145		CG2225	FBgn0032957	CG2225
ASPP	FBgn0034606	CG18375		CG18128	FBgn0034898	CG18128		coro	FBgn0265935	CG9446		CG11788	FBgn0034495	CG11788		Set2	FBgn0030486	CG1716		COX7C	FBgn0040773	CG2249
Cyp49a1	FBgn0033524	CG18377		CG18135	FBgn0036837	CG18135		CG9590	FBgn0038360	CG9590		Sod1	FBgn0003462	CG11793		CG17191	FBgn0039473	CG17191		Gclc	FBgn0040319	CG2259
InR	FBgn0283499	CG18402		CG1815	FBgn0039863	CG1815		Task6	FBgn0038165	CG9637		CG11835	FBgn0031264	CG11835		KP78b	FBgn0026063	CG17216		CG2269	FBgn0033484	CG2269
spen	FBgn0016977	CG18497		CG18179	FBgn0036023	CG18179		grn	FBgn0001138	CG9656		rempA	FBgn0260933	CG11838		pros	FBgn0004595	CG17228		eve	FBgn0000606	CG2328
CG18507	FBgn0028527	CG18507		alt	FBgn0038535	CG18212		eIF3f1	FBgn0037270	CG9769		dan	FBgn0039286	CG11849		Fbp1	FBgn0000639	CG17285		twr	FBgn0262801	CG2358
Adk3	FBgn0026602	CG1851		Shark	FBgn0015295	CG18247		CG9795	FBgn0037234	CG9795		Alg9	FBgn0039293	CG11851		CG17298	FBgn0038879	CG17298		psq	FBgn0263102	CG2368
ttk	FBgn0003870	CG1856		slx1	FBgn0037263	CG18271		Or59a	FBgn0026384	CG9820		Nup358	FBgn0039302	CG11856		SNF4Agamma	FBgn0264357	CG17299		phr6-4	FBgn0016054	CG2488
SmE	FBgn0261790	CG18591		dre4	FBgn0002183	CG1828		Fkbp14	FBgn0010470	CG9847		CG11857	FBgn0039303	CG11857		CG17362	FBgn0036393	CG17362		CG2493	FBgn0032864	CG2493
prod	FBgn0014269	CG18608		CG18301	FBgn0032265	CG18301		CG9932	FBgn0262160	CG9932		CG11873	FBgn0039633	CG11873		Lnk	FBgn0028717	CG17367		lap	FBgn0086372	CG2520
Cht7	FBgn0035398	CG1869		Mondo	FBgn0032940	CG18362		snu	FBgn0039594	CG9990		Pdhb	FBgn0039635	CG11876		CG17377	FBgn0031859	CG17377		IKKepsilon	FBgn0086657	CG2615
mor	FBgn0002783	CG18740		InR	FBgn0283499	CG18402		shams	FBgn0039273	CG9996		Atg14	FBgn0039636	CG11877		jigr1	FBgn0039350	CG17383		sgg	FBgn0003371	CG2621
Gdap2	FBgn0042135	CG18812		Sema1a	FBgn0011259	CG18405		tRNA:Lys-CTT-1-10	FBgn0011896	CR30507		Ctl2	FBgn0039637	CG11880		CG17404	FBgn0038001	CG17404		HLH3B	FBgn0011276	CG2655
CG1894	FBgn0039585	CG1894		CAP	FBgn0033504	CG18408		tRNA:Lys-CTT-1-11	FBgn0011897	CR30520		CG11883	FBgn0033538	CG11883		CG17470	FBgn0032869	CG17470		d4	FBgn0033015	CG2682
Dr	FBgn0000492	CG1897		Br140	FBgn0033155	CG1845		tRNA:Ser-GCT-2-2	FBgn0011971	CR31476		Rpn2	FBgn0028692	CG11888		CG17712	FBgn0027597	CG17712		Pi3K21B	FBgn0020622	CG2699
CG1907	FBgn0039674	CG1907		Optix	FBgn0025360	CG18455		tRNA:Thr-AGT-1-3	FBgn0051497	CR31497		m-cup	FBgn0038488	CG11896		inv	FBgn0001269	CG17835		Pbp95	FBgn0037540	CG2702
Wnt2	FBgn0004360	CG1916		Lhr	FBgn0034217	CG18468		tRNA:Val-CAC-2-4	FBgn0012001	CR31502		CG11898	FBgn0039645	CG11898		Tango4	FBgn0030365	CG1796		emp	FBgn0010435	CG2727
sty	FBgn0014388	CG1921		spen	FBgn0016977	CG18497		snRNA:U4:38AB	FBgn0003931	CR32879		CG11902	FBgn0028647	CG11902		CG17994	FBgn0033072	CG17994		CG2765	FBgn0035087	CG2765
CG1943	FBgn0037468	CG1943		ttk	FBgn0003870	CG1856		snRNA:U4:25F	FBgn0041719	CR32998		CG11911	FBgn0031249	CG11911		Eip78C	FBgn0004865	CG18023		Raf	FBgn0003079	CG2845
Pkc98E	FBgn0003093	CG1954		CG18599	FBgn0038592	CG18599		CR33255	FBgn0053255	CR33255		ND-49L	FBgn0039331	CG11913		SoxN	FBgn0029123	CG18024		Rala	FBgn0015286	CG2849
Acf	FBgn0027620	CG1966		CG18635	FBgn0034279	CG18635		snoRNA:Me18S-G423	FBgn0086052	CR34681		CG11920	FBgn0039274	CG11920		FarO	FBgn0023550	CG18031		Nmdar1	FBgn0010399	CG2902
ND-49	FBgn0039909	CG1970		Bem46	FBgn0025109	CG18642		lncRNA:CR40172	FBgn0058172	CR40172		fd96Ca	FBgn0004897	CG11921		CG18130	FBgn0030359	CG18130		CG2909	FBgn0030189	CG2909
CG1983	FBgn0039751	CG1983		Teh3	FBgn0040697	CG18676		lncRNA:CR42836	FBgn0262025	CR42836		fd96Cb	FBgn0004898	CG11922		PIG-Wb	FBgn0035265	CG18173		Ets21C	FBgn0005660	CG2914
Taf3	FBgn0026262	CG2009		Gdap2	FBgn0042135	CG18812		mir-957	FBgn0262182	CR42889		Cf2	FBgn0000286	CG11924		Toll-4	FBgn0032095	CG18241		CG2930	FBgn0028491	CG2930
Ubc6	FBgn0004436	CG2013		Ugt305A1	FBgn0042179	CG18869		mir-2493	FBgn0262315	CR43022		Mon1	FBgn0031640	CG11926		Shark	FBgn0015295	CG18247		mRpS9	FBgn0037529	CG2957
CG2017	FBgn0037391	CG2017		sax	FBgn0003317	CG1891		lncRNA:CR43753	FBgn0264084	CR43753		kat-60L1	FBgn0037375	CG1193		dre4	FBgn0002183	CG1828		CG2991	FBgn0031474	CG2991
CSN7	FBgn0028836	CG2038		CG1894	FBgn0039585	CG1894		lncRNA:CR43763	FBgn0264263	CR43763		pico	FBgn0261811	CG11940		CG18302	FBgn0032266	CG18302		CG2993	FBgn0037521	CG2993
lgs	FBgn0039907	CG2041		Dr	FBgn0000492	CG1897		lncRNA:CR43766	FBgn0264266	CR43766		Nup205	FBgn0031078	CG11943		Dic4	FBgn0036808	CG18363		unc-13	FBgn0025726	CG2999
Pkn	FBgn0020621	CG2049		HBS1	FBgn0042712	CG1898		lncRNA:CR43831	FBgn0264379	CR43831		cora	FBgn0010434	CG11949		CG18404	FBgn0039761	CG18404		tea	FBgn0285892	CG30007
Myd88	FBgn0033402	CG2078		alph	FBgn0086361	CG1906		lncRNA:CR43912	FBgn0264513	CR43912		Cnx99A	FBgn0015622	CG11958		CAP	FBgn0033504	CG18408		Gga	FBgn0030141	CG3002
Sec8	FBgn0266672	CG2095		CG1907	FBgn0039674	CG1907		lncRNA:CR43970	FBgn0264701	CR43970		RagA-B	FBgn0037647	CG11968		Ude	FBgn0039226	CG18410		jeb	FBgn0086677	CG30040
mRpS35	FBgn0035374	CG2101		Cpr62Bc	FBgn0035281	CG1919		lncRNA:CR44145	FBgn0264994	CR44145		CG11970	FBgn0027503	CG11970		Optix	FBgn0025360	CG18455		CG30089	FBgn0050089	CG30089
Rab23	FBgn0037364	CG2108		onecut	FBgn0028996	CG1922		lncRNA:CR44177	FBgn0265066	CR44177		Rpb5	FBgn0033571	CG11979		CG18480	FBgn0028518	CG18480		jbug	FBgn0028371	CG30092
didum	FBgn0261397	CG2146		CG1965	FBgn0037466	CG1965		lncRNA:CR44206	FBgn0265104	CR44206		tgo	FBgn0264075	CG11987		run	FBgn0003300	CG1849		CG30338	FBgn0050338	CG30338
Rga	FBgn0017550	CG2161		Cog6	FBgn0033401	CG1968		lncRNA:CR44725	FBgn0265938	CR44725		neur	FBgn0002932	CG11988		AOX2	FBgn0038348	CG18519		CG30349	FBgn0050349	CG30349
CG2162	FBgn0035388	CG2162		RhoGAP100F	FBgn0039883	CG1976		lncRNA:CR44734	FBgn0265947	CR44734		hyx	FBgn0037657	CG11990		Or43a	FBgn0026389	CG1854		CG30377	FBgn0050377	CG30377
RpS3A	FBgn0017545	CG2168		Sodh-1	FBgn0024289	CG1982		lncRNA:CR44785	FBgn0266020	CR44785		Rel	FBgn0014018	CG11992		CG18577	FBgn0037870	CG18577		CG30394	FBgn0050394	CG30394
Gasz	FBgn0033273	CG2183		Taf3	FBgn0026262	CG2009		lncRNA:CR44795	FBgn0266030	CR44795		Aplip1	FBgn0040281	CG1200		CG18596	FBgn0038953	CG18596		CG3040	FBgn0029925	CG3040
Galphao	FBgn0001122	CG2204		FipoQ	FBgn0039667	CG2010		lncRNA:CR44863	FBgn0266157	CR44863		Prosbeta7	FBgn0250746	CG12000		CG18635	FBgn0034279	CG18635		CG30412	FBgn0050412	CG30412
CG2225	FBgn0032957	CG2225		CG2017	FBgn0037391	CG2017		lncRNA:CR44903	FBgn0266208	CR44903		spartin	FBgn0037265	CG12001		Hr38	FBgn0014859	CG1864		CG30419	FBgn0050419	CG30419
COX7C	FBgn0040773	CG2249		Hpr1	FBgn0037382	CG2031		lncRNA:CR44978	FBgn0266313	CR44978		Pxn	FBgn0011828	CG12002		Dtd	FBgn0037898	CG18643		CG30428	FBgn0050428	CG30428
Trc8	FBgn0039668	CG2304		CSN7	FBgn0028836	CG2038		lncRNA:CR45043	FBgn0266403	CR45043		CG12004	FBgn0035236	CG12004		CG18666	FBgn0040967	CG18666		Opbp	FBgn0050443	CG30443
ABCD	FBgn0039890	CG2316		ftz	FBgn0001077	CG2047		lncRNA:CR45239	FBgn0266774	CR45239		Mms19	FBgn0037301	CG12005		CG18744	FBgn0042101	CG18744		CG30467	FBgn0050467	CG30467
eve	FBgn0000606	CG2328		Pkn	FBgn0020621	CG2049		lncRNA:CR45280	FBgn0266818	CR45280		CG12007	FBgn0037293	CG12007		Ugt305A1	FBgn0042179	CG18869		CG30479	FBgn0050479	CG30479
psq	FBgn0263102	CG2368		mod	FBgn0002780	CG2050		lncRNA:CR45419	FBgn0266968	CR45419		CG12009	FBgn0035430	CG12009		CG1894	FBgn0039585	CG1894		mr	FBgn0002791	CG3060
Ctr9	FBgn0035205	CG2469		Hat1	FBgn0037376	CG2051		lncRNA:CR45424	FBgn0266973	CR45424		CG12020	FBgn0035273	CG12020		Cpr62Bc	FBgn0035281	CG1919		CG3061	FBgn0038195	CG3061
brun	FBgn0261787	CG2478		scra	FBgn0261385	CG2092		lncRNA:CR45554	FBgn0267114	CR45554		Patj	FBgn0067864	CG12021		Cyp4p2	FBgn0033395	CG1944		CG3081	FBgn0025613	CG3081
lap	FBgn0086372	CG2520		Sec8	FBgn0266672	CG2095		lncRNA:CR45673	FBgn0267233	CR45673		GV1	FBgn0027790	CG12023		CG1958	FBgn0029940	CG1958		qless	FBgn0051005	CG31005
kkv	FBgn0001311	CG2666		cas	FBgn0004878	CG2102		lncRNA:CR45685	FBgn0267245	CR45685		Gale	FBgn0035147	CG12030		Cog6	FBgn0033401	CG1968		stops	FBgn0086704	CG31006
gsb-n	FBgn0001147	CG2692		CPT2	FBgn0035383	CG2107		lncRNA:CR45762	FBgn0267400	CR45762		MED14	FBgn0035145	CG12031		CG1999	FBgn0029947	CG1999		CG31007	FBgn0051007	CG31007
Pi3K21B	FBgn0020622	CG2699		CG2121	FBgn0033289	CG2121		lncRNA:CR45962	FBgn0267624	CR45962		DCTN4-p62	FBgn0033206	CG12042		CG2003	FBgn0039886	CG2003		cindr	FBgn0027598	CG31012
emp	FBgn0010435	CG2727		aralar1	FBgn0028646	CG2139		lncRNA:CR46004	FBgn0267666	CR46004		mud	FBgn0002873	CG12047		dati	FBgn0262636	CG2052		CG31028	FBgn0051028	CG31028
CG2765	FBgn0035087	CG2765		CG2162	FBgn0035388	CG2162		lncRNA:CR46023	FBgn0267687	CR46023		CG12054	FBgn0039831	CG12054		Sym	FBgn0037371	CG2097		CG31030	FBgn0051030	CG31030
Snx1	FBgn0031534	CG2774		Dfd	FBgn0000439	CG2189		lncRNA:CR46087	FBgn0267756	CR46087		mey	FBgn0039851	CG12063		cas	FBgn0004878	CG2102		gukh	FBgn0026239	CG31043
Gsc	FBgn0010323	CG2851		CG2199	FBgn0035213	CG2199		lncRNA:CR46234	FBgn0267954	CR46234		Sap-r	FBgn0000416	CG12070		Rab23	FBgn0037364	CG2108		spg	FBgn0264324	CG31048
gus	FBgn0026238	CG2944		CstF50	FBgn0039867	CG2261		lncRNA:TS3	FBgn0284411	CR46325		CG12071	FBgn0039808	CG12071		CG2157	FBgn0030244	CG2157		CG31051	FBgn0051051	CG31051
mRpS9	FBgn0037529	CG2957		Jra	FBgn0001291	CG2275			FBgn0027341			wts	FBgn0011739	CG12072		su(r)	FBgn0086450	CG2194		CG3107	FBgn0033005	CG3107
CG2972	FBgn0030177	CG2972		Ccp84Ag	FBgn0004777	CG2342			FBgn0259234			CG12075	FBgn0030065	CG12075		Ama	FBgn0000071	CG2198		TTLL5	FBgn0051108	CG31108
ems	FBgn0000576	CG2988		atms	FBgn0010750	CG2503						CG12081	FBgn0030053	CG12081		CG2199	FBgn0035213	CG2199		ewg	FBgn0005427	CG3114
CG2991	FBgn0031474	CG2991		corto	FBgn0010313	CG2530						Usp5	FBgn0035402	CG12082		CG2202	FBgn0030240	CG2202		CG31140	FBgn0051140	CG31140
tea	FBgn0285892	CG30007		CG2616	FBgn0037512	CG2616						cue	FBgn0011204	CG12086		CG2233	FBgn0029990	CG2233		CG31145	FBgn0051145	CG31145
CG30015	FBgn0050015	CG30015		d4	FBgn0033015	CG2682						Iml1	FBgn0035227	CG12090		Ccp84Ag	FBgn0004777	CG2342		SKIP	FBgn0051163	CG31163
CG30089	FBgn0050089	CG30089		CG2698	FBgn0037536	CG2698						CG12096	FBgn0030457	CG12096		corto	FBgn0010313	CG2530		CG31191	FBgn0051191	CG31191
GEFmeso	FBgn0050115	CG30115		emp	FBgn0010435	CG2727						Pdk1	FBgn0020386	CG1210		fs(1)Ya	FBgn0000927	CG2707		CG31221	FBgn0051221	CG31221
Ttd14	FBgn0284257	CG30118		Snx1	FBgn0031534	CG2774						Caf1-180	FBgn0030054	CG12109		Gsc	FBgn0010323	CG2851		repo	FBgn0011701	CG31240
Hil	FBgn0050147	CG30147		Gsc	FBgn0010323	CG2851						CG12118	FBgn0030101	CG12118		Tpc2	FBgn0035078	CG2857		Brf	FBgn0038499	CG31256
galla-1	FBgn0034543	CG30152		Prat	FBgn0004901	CG2867						SmydA-9	FBgn0030102	CG12119		Ets21C	FBgn0005660	CG2914		rec	FBgn0003227	CG31293
Brca2	FBgn0050169	CG30169		twi	FBgn0003900	CG2956						p130CAS	FBgn0035101	CG1212		twi	FBgn0003900	CG2956		CG31344	FBgn0051344	CG31344
Ipp	FBgn0016672	CG3028		Fnta	FBgn0031633	CG2976						CG12121	FBgn0030109	CG12121		ems	FBgn0000576	CG2988		Unc-115a	FBgn0051352	CG31352
CG30344	FBgn0050344	CG30344		ems	FBgn0000576	CG2988						CG12123	FBgn0030039	CG12123		CG2990	FBgn0030170	CG2990		foxo	FBgn0038197	CG3143
CG30419	FBgn0050419	CG30419		CG2991	FBgn0031474	CG2991						mxc	FBgn0260789	CG12124		COX6AL	FBgn0050093	CG30093		CG31457	FBgn0051457	CG31457
Opbp	FBgn0050443	CG30443		Tret1-1	FBgn0050035	CG30035						Pal1	FBgn0283510	CG12130		Vajk4	FBgn0050101	CG30101		Pif2	FBgn0046873	CG31483
Pgant9	FBgn0050463	CG30463		Zasp52	FBgn0265991	CG30084						CG12147	FBgn0037325	CG12147		Pym	FBgn0034918	CG30176		Rbp9	FBgn0010263	CG3151
CG30467	FBgn0050467	CG30467		Rif1	FBgn0050085	CG30085						Hira	FBgn0022786	CG12153		GABA-B-R3	FBgn0031275	CG3022		CG31523	FBgn0051523	CG31523
Traf4	FBgn0026319	CG3048		galla-1	FBgn0034543	CG30152						oc	FBgn0004102	CG12154		CG30222	FBgn0050222	CG30222		CG31549	FBgn0051549	CG31549
Prosap	FBgn0040752	CG30483		Pym	FBgn0034918	CG30176						CG12159	FBgn0033232	CG12159		stum	FBgn0050263	CG30263		Eaat2	FBgn0026438	CG3159
mr	FBgn0002791	CG3060		GABA-B-R3	FBgn0031275	CG3022						mri	FBgn0035107	CG1216		CG30271	FBgn0050271	CG30271		Bsg	FBgn0261822	CG31605
stops	FBgn0086704	CG31006		pyd3	FBgn0037513	CG3027						CG12164	FBgn0033158	CG12164		Ipp	FBgn0016672	CG3028		sens-2	FBgn0051632	CG31632
CG31008	FBgn0051008	CG31008		CG30338	FBgn0050338	CG30338						Ppm1	FBgn0035143	CG12169		Vha100-3	FBgn0028669	CG30329		Pgant5	FBgn0031681	CG31651
Cad99C	FBgn0039709	CG31009		CG30419	FBgn0050419	CG30419						Spn43Aa	FBgn0024294	CG12172		CG30334	FBgn0050334	CG30334		chinmo	FBgn0086758	CG31666
cindr	FBgn0027598	CG31012		CG30431	FBgn0050431	CG30431						ProRS-m	FBgn0027082	CG12186		CG30350	FBgn0050350	CG30350		CG31678	FBgn0051678	CG31678
Atg16	FBgn0039705	CG31033		CG30461	FBgn0050461	CG30461						CG12206	FBgn0029662	CG12206		Mal-A6	FBgn0050360	CG30360		CG31688	FBgn0263355	CG31688
Cog7	FBgn0051040	CG31040		cindr	FBgn0027598	CG31012						red	FBgn0285913	CG12207		CG30384	FBgn0050384	CG30384		CG31690	FBgn0051690	CG31690
CG3107	FBgn0033005	CG3107		Atg16	FBgn0039705	CG31033						CG12209	FBgn0033498	CG12209		nord	FBgn0050418	CG30418		CG31694	FBgn0051694	CG31694
TTLL5	FBgn0051108	CG31108		Mhcl	FBgn0026059	CG31045						Syb	FBgn0003660	CG12210		CG30419	FBgn0050419	CG30419		CG31706	FBgn0051706	CG31706
CG31121	FBgn0051121	CG31121		spg	FBgn0264324	CG31048						PpV	FBgn0003139	CG12217		CG30431	FBgn0050431	CG30431		Trim9	FBgn0051721	CG31721
Slimp	FBgn0051133	CG31133		Pask	FBgn0034950	CG3105						mei-P26	FBgn0026206	CG12218		CG30461	FBgn0050461	CG30461		CG31729	FBgn0051729	CG31729
CG31145	FBgn0051145	CG31145		CG31051	FBgn0051051	CG31051						CG12219	FBgn0043796	CG12219		Pgant9	FBgn0050463	CG30463		CG31741	FBgn0051741	CG31741
SKIP	FBgn0051163	CG31163		CG31055	FBgn0051055	CG31055						mRpL32	FBgn0039835	CG12220		CG30485	FBgn0050485	CG30485		ham	FBgn0045852	CG31753
CG31176	FBgn0051176	CG31176		Gr98b	FBgn0046887	CG31059						Spt6	FBgn0028982	CG12225		CG30487	FBgn0050487	CG30487		fred	FBgn0051774	CG31774
CG31195	FBgn0051195	CG31195		side	FBgn0016061	CG31062						SkpF	FBgn0034863	CG12227		NTPase	FBgn0024947	CG3059		IA-2	FBgn0031294	CG31795
14-3-3epsilon	FBgn0020238	CG31196		CG31076	FBgn0051076	CG31076						Arp10	FBgn0031050	CG12235		CG3081	FBgn0025613	CG3081		RpII140	FBgn0262955	CG3180
Tpl94D	FBgn0051281	CG31281		LpR1	FBgn0066101	CG31094						CG12237	FBgn0031048	CG12237		hfw	FBgn0001189	CG3095		CenG1A	FBgn0028509	CG31811
Duox	FBgn0283531	CG3131		TTLL5	FBgn0051108	CG31108						e(y)3	FBgn0087008	CG12238		CG31007	FBgn0051007	CG31007		CG31935	FBgn0051935	CG31935
Unc-115a	FBgn0051352	CG31352		CG31128	FBgn0051128	CG31128						gcm	FBgn0014179	CG12245		CG31021	FBgn0051021	CG31021		4E-T	FBgn0052016	CG32016
Jupiter	FBgn0051363	CG31363		CG31195	FBgn0051195	CG31195						mira	FBgn0021776	CG12249		Atg16	FBgn0039705	CG31033		Argk	FBgn0000116	CG32031
CG31388	FBgn0051388	CG31388		CG31199	FBgn0051199	CG31199						AQP	FBgn0033807	CG12251		Gr98b	FBgn0046887	CG31059		fry	FBgn0016081	CG32045
CG31495	FBgn0051495	CG31495		modSP	FBgn0051217	CG31217						MED25	FBgn0038760	CG12254		LpR2	FBgn0051092	CG31092		dpr10	FBgn0052057	CG32057
CG31549	FBgn0051549	CG31549		CG31221	FBgn0051221	CG31221						CG12259	FBgn0039557	CG12259		LpR1	FBgn0066101	CG31094		Rbfox1	FBgn0052062	CG32062
CG31550	FBgn0051550	CG31550		CG31230	FBgn0051230	CG31230						angel	FBgn0016762	CG12273		modSP	FBgn0051217	CG31217		CG32099	FBgn0052099	CG32099
gammaTub23C	FBgn0260639	CG3157		CG3124	FBgn0034840	CG3124						Ptpmeg	FBgn0261985	CG1228		CG3124	FBgn0034840	CG3124		SCaMC	FBgn0052103	CG32103
Bsg	FBgn0261822	CG31605		repo	FBgn0011701	CG31240						Diap1	FBgn0260635	CG12284		repo	FBgn0011701	CG31240		Vps13D	FBgn0052113	CG32113
Vha16-1	FBgn0262736	CG3161		dpr17	FBgn0051361	CG31361						pdm2	FBgn0004394	CG12287		CG31279	FBgn0051279	CG31279		stv	FBgn0086708	CG32130
CG31637	FBgn0051637	CG31637		CG31457	FBgn0051457	CG31457						CG12288	FBgn0032620	CG12288		CG31296	FBgn0051296	CG31296		Rbp6	FBgn0260943	CG32169
stai	FBgn0266521	CG31641		CG31465	FBgn0051465	CG31465						klu	FBgn0013469	CG12296		stumps	FBgn0020299	CG31317		CG32204	FBgn0052204	CG32204
Pgant5	FBgn0031681	CG31651		Pif2	FBgn0046873	CG31483						CG1231	FBgn0035134	CG1231		CG31323	FBgn0051323	CG31323		CG32206	FBgn0052206	CG32206
chinmo	FBgn0086758	CG31666		NKCC	FBgn0051547	CG31547						tw	FBgn0086368	CG12311		CG31358	FBgn0051358	CG31358		CG32264	FBgn0052264	CG32264
CG31678	FBgn0051678	CG31678		CG31549	FBgn0051549	CG31549						tipE	FBgn0003710	CG1232		CG31373	FBgn0051373	CG31373		CG32281	FBgn0052281	CG32281
CG31688	FBgn0263355	CG31688		CG31559	FBgn0051559	CG31559						Prosbeta5	FBgn0029134	CG12323		CG31418	FBgn0051418	CG31418		CG32333	FBgn0052333	CG32333
Spt3	FBgn0037981	CG3169		Bsg	FBgn0261822	CG31605						CG12325	FBgn0033557	CG12325		CG31495	FBgn0051495	CG31495		PVRAP	FBgn0052406	CG32406
IntS1	FBgn0034964	CG3173		sens-2	FBgn0051632	CG31632						CG1233	FBgn0035137	CG1233		TotZ	FBgn0044809	CG31507		CG32409	FBgn0052409	CG32409
CG31743	FBgn0032618	CG31743		Pgant5	FBgn0031681	CG31651						Wdr37	FBgn0038617	CG12333		CG31516	FBgn0051516	CG31516		shep	FBgn0052423	CG32423
DIP-kappa	FBgn0051814	CG31814		wry	FBgn0051665	CG31665						CG12347	FBgn0038558	CG12347		CG31549	FBgn0051549	CG31549		CG32428	FBgn0052428	CG32428
Samuel	FBgn0032330	CG31868		CG31673	FBgn0051673	CG31673						Sh	FBgn0003380	CG12348		sens-2	FBgn0051632	CG31632		CG32432	FBgn0052432	CG32432
4E-T	FBgn0052016	CG32016		CG31678	FBgn0051678	CG31678						Paip2	FBgn0038100	CG12358		CG31677	FBgn0051677	CG31677		siz	FBgn0026179	CG32434
Cpr66D	FBgn0052029	CG32029		Spt3	FBgn0037981	CG3169						Ulp1	FBgn0027603	CG12359		CG31678	FBgn0051678	CG31678		SPoCk	FBgn0052451	CG32451
Rap2l	FBgn0283666	CG3204		Trim9	FBgn0051721	CG31721						CG1236	FBgn0037370	CG1236		CG31693	FBgn0051693	CG31693		CG32473	FBgn0052473	CG32473
fry	FBgn0016081	CG32045		Prosbeta5R2	FBgn0051742	CG31742						Lac	FBgn0010238	CG12369		RluA-1	FBgn0051719	CG31719		cpx	FBgn0041605	CG32490
scramb1	FBgn0052056	CG32056		CG31773	FBgn0051773	CG31773						Fpps	FBgn0025373	CG12389		Trim9	FBgn0051721	CG31721		dnc	FBgn0000479	CG32498
Rbfox1	FBgn0052062	CG32062		Rrp1	FBgn0004584	CG3178						CG12391	FBgn0033581	CG12391		l(2)k05911	FBgn0284244	CG31728		tbc	FBgn0052506	CG32506
simj	FBgn0010762	CG32067		CG31787	FBgn0051787	CG31787						Mad	FBgn0011648	CG12399		IntS1	FBgn0034964	CG3173		CG32521	FBgn0052521	CG32521
IRSp53	FBgn0052082	CG32082		CG31793	FBgn0051793	CG31793						Yip1d1	FBgn0032465	CG12404		ms(2)35Ci	FBgn0011239	CG31733		Hers	FBgn0052529	CG32529
Gpat4	FBgn0034971	CG3209		Fum4	FBgn0051874	CG31874						mIF2	FBgn0039588	CG12413		CG31741	FBgn0051741	CG31741		CG3257	FBgn0034978	CG3257
CG32099	FBgn0052099	CG32099		Argk	FBgn0000116	CG32031						ckn	FBgn0033987	CG12424		Prosbeta5R2	FBgn0051742	CG31742		disco-r	FBgn0285879	CG32577
Drp1	FBgn0026479	CG3210		Rap2l	FBgn0283666	CG3204						raw	FBgn0003209	CG12437		ham	FBgn0045852	CG31753		dpr8	FBgn0052600	CG32600
SCaMC	FBgn0052103	CG32103		fry	FBgn0016081	CG32045						CG12438	FBgn0032065	CG12438		CG31787	FBgn0051787	CG31787		AMPdeam	FBgn0052626	CG32626
CG32104	FBgn0052104	CG32104		CG32053	FBgn0052053	CG32053						CG12477	FBgn0036809	CG12477		IA-2	FBgn0031294	CG31795		Ptpmeg2	FBgn0028341	CG32697
Sox21b	FBgn0042630	CG32139		CG32085	FBgn0052085	CG32085						side-VIII	FBgn0086604	CG12484		CG31861	FBgn0051861	CG31861		sdt	FBgn0261873	CG32717
dlp	FBgn0041604	CG32146		Drp1	FBgn0026479	CG3210						dnr1	FBgn0260866	CG12489		CG31867	FBgn0051867	CG31867		CG32767	FBgn0052767	CG32767
RhoGAP71E	FBgn0036518	CG32149		CG32102	FBgn0052102	CG32102						CG12496	FBgn0040385	CG12496		S-Lap3	FBgn0045770	CG32063		SdhB	FBgn0014028	CG3283
Mbs	FBgn0005536	CG32156		SCaMC	FBgn0052103	CG32103						CG12499	FBgn0038968	CG12499		RhoGAP5A	FBgn0029778	CG3208		CG32846	FBgn0052846	CG32846
Eip74EF	FBgn0000567	CG32180		Lmx1a	FBgn0052105	CG32105						Sec23	FBgn0262125	CG1250		CG32081	FBgn0052081	CG32081		VAChT	FBgn0270928	CG32848
CG32188	FBgn0052188	CG32188		Sr-CIV	FBgn0031547	CG3212						CG12502	FBgn0035171	CG12502		CG32087	FBgn0052087	CG32087		CG32944	FBgn0052944	CG32944
CG32243	FBgn0052243	CG32243		stv	FBgn0086708	CG32130						CG12511	FBgn0031729	CG12511		rols	FBgn0041096	CG32096		CG32982	FBgn0052982	CG32982
CG32264	FBgn0052264	CG32264		dlp	FBgn0041604	CG32146						CG12531	FBgn0031064	CG12531		Lmx1a	FBgn0052105	CG32105		Mocs1	FBgn0263241	CG33048
snama	FBgn0086129	CG3231		RhoGAP71E	FBgn0036518	CG32149						AP-1-2beta	FBgn0010380	CG12532		Sox21b	FBgn0042630	CG32139		CG33080	FBgn0053080	CG33080
Atac3	FBgn0052343	CG32343		dsx-c73A	FBgn0261799	CG32159						rdx	FBgn0264493	CG12537		CG32236	FBgn0046793	CG32236		LRP1	FBgn0053087	CG33087
E(bx)	FBgn0000541	CG32346		Rbp6	FBgn0260943	CG32169						CG12589	FBgn0040684	CG12589		RhoGEF64C	FBgn0035574	CG32239		Ppn	FBgn0003137	CG33103
shep	FBgn0052423	CG32423		CG32191	FBgn0052191	CG32191						Cpr64Ad	FBgn0035513	CG1259		CG32248	FBgn0052248	CG32248		CG33111	FBgn0053111	CG33111
CG32432	FBgn0052432	CG32432		PMP34	FBgn0052250	CG32250						CG12590	FBgn0037294	CG12590		CG32264	FBgn0052264	CG32264		CG33129	FBgn0053129	CG33129
siz	FBgn0026179	CG32434		CG32301	FBgn0052301	CG32301						Adar	FBgn0026086	CG12598		CG32301	FBgn0052301	CG32301		sns	FBgn0024189	CG33141
chb	FBgn0021760	CG32435		snama	FBgn0086129	CG3231						Gr10b	FBgn0030297	CG12622		CG32302	FBgn0052302	CG32302		CG33144	FBgn0053144	CG33144
SMC5	FBgn0052438	CG32438		ltl	FBgn0268063	CG32372						lab	FBgn0002522	CG1264		CG32305	FBgn0052305	CG32305		SrpRbeta	FBgn0011509	CG33162
mtd	FBgn0013576	CG32464		Myt1	FBgn0040298	CG32417						CG12645	FBgn0030181	CG12645		ImpE1	FBgn0001253	CG32356		beat-IIIb	FBgn0053179	CG33179
CG32473	FBgn0052473	CG32473		shep	FBgn0052423	CG32423						CG1265	FBgn0035517	CG1265		tut	FBgn0052364	CG32364		CG33181	FBgn0053181	CG33181
Usp10	FBgn0052479	CG32479		CG32432	FBgn0052432	CG32432						btd	FBgn0000233	CG12653		CG32376	FBgn0052376	CG32376		dpr11	FBgn0053202	CG33202
Zfrp8	FBgn0021875	CG3260		siz	FBgn0026179	CG32434						Ir7a	FBgn0029961	CG12663		CG32379	FBgn0052379	CG32379		Gmap	FBgn0027287	CG33206
CG3262	FBgn0032986	CG3262		SPoCk	FBgn0052451	CG32451						CG12672	FBgn0030886	CG12672		Or65b	FBgn0041624	CG32402		Mical	FBgn0053208	CG33208
Eb1	FBgn0027066	CG3265		mtd	FBgn0013576	CG32464						olf413	FBgn0037153	CG12673		sob	FBgn0004892	CG3242		CG33233	FBgn0053233	CG33233
Vti1a	FBgn0260862	CG3279		CG32473	FBgn0052473	CG32473						CG12679	FBgn0031103	CG12679		siz	FBgn0026179	CG32434		Trl	FBgn0013263	CG33261
SdhB	FBgn0014028	CG3283		cpx	FBgn0041605	CG32490						CG12688	FBgn0029707	CG12688		CG32447	FBgn0052447	CG32447		CG33278	FBgn0053278	CG33278
CG32855	FBgn0052855	CG32855		Eb1	FBgn0027066	CG3265						zld	FBgn0259789	CG12701		mtd	FBgn0013576	CG32464		CG3328	FBgn0034985	CG3328
CG32982	FBgn0052982	CG32982		Bap170	FBgn0042085	CG3274						CG12702	FBgn0031070	CG12702		CG32473	FBgn0052473	CG32473		qvr	FBgn0260499	CG33472
CG3308	FBgn0038877	CG3308		CG3308	FBgn0038877	CG3308						Pmp70	FBgn0031069	CG12703		dysf	FBgn0039411	CG32474		dpr4	FBgn0053512	CG33512
CG33090	FBgn0028916	CG33090		LRP1	FBgn0053087	CG33087						CG12713	FBgn0036536	CG12713		CG32548	FBgn0052548	CG32548		CG3358	FBgn0033117	CG3358
Synd	FBgn0053094	CG33094		CG33090	FBgn0028916	CG33090						CG12723	FBgn0030459	CG12723		CG32564	FBgn0052564	CG32564		CG33700	FBgn0053700	CG33700
Rtnl1	FBgn0053113	CG33113		CG33096	FBgn0053096	CG33096						CG12728	FBgn0029825	CG12728		TwdlX	FBgn0052571	CG32571		Sema2b	FBgn0264273	CG33960
Patronin	FBgn0263197	CG33130		CG33109	FBgn0053109	CG33109						mEFTu2	FBgn0033184	CG12736		CG32573	FBgn0052573	CG32573		Octbeta2R	FBgn0038063	CG33976
CG33144	FBgn0053144	CG33144		Rtnl1	FBgn0053113	CG33113						ncm	FBgn0086707	CG12750		Zfrp8	FBgn0021875	CG3260		Mid1	FBgn0053988	CG33988
CG33156	FBgn0053156	CG33156		LeuRS	FBgn0284253	CG33123						Or42b	FBgn0033043	CG12754		Muc12Ea	FBgn0052602	CG32602		capu	FBgn0000256	CG3399
Kdm4B	FBgn0053182	CG33182		DCAF12	FBgn0037980	CG3313						Eaf6	FBgn0035624	CG12756		CG32631	FBgn0052631	CG32631		dpr13	FBgn0034286	CG33996
Hr3	FBgn0000448	CG33183		SCAP	FBgn0033052	CG33131						sano	FBgn0034408	CG12758		Tpst	FBgn0086674	CG32632		CG3407	FBgn0031573	CG3407
mbl	FBgn0265487	CG33197		CG33144	FBgn0053144	CG33144						TfIIEbeta	FBgn0015829	CG1276		CG32633	FBgn0052633	CG32633		chk	FBgn0033095	CG3409
Mical	FBgn0053208	CG33208		CG33158	FBgn0053158	CG33158						fsd	FBgn0033813	CG12765		CG32695	FBgn0052695	CG32695		mld	FBgn0263490	CG34100
CG33230	FBgn0053230	CG33230		SrpRbeta	FBgn0011509	CG33162						CG12769	FBgn0033252	CG12769		sdt	FBgn0261873	CG32717		bs	FBgn0004101	CG3411
Trl	FBgn0013263	CG33261		Hr3	FBgn0000448	CG33183						Rubicon	FBgn0030055	CG12772		Muc4B	FBgn0052774	CG32774		side-III	FBgn0083949	CG34113
E23	FBgn0020445	CG3327		Mical	FBgn0053208	CG33208						nahoda	FBgn0034797	CG12781		CG32795	FBgn0040384	CG32795		side-VI	FBgn0083950	CG34114
CG33278	FBgn0053278	CG33278		CG33253	FBgn0030992	CG33253						Mat89Ba	FBgn0261286	CG12785		CG32812	FBgn0025642	CG32812		Nlg3	FBgn0083963	CG34127
CG33286	FBgn0053286	CG33286		CG33262	FBgn0053262	CG33262						hoe1	FBgn0041150	CG12787		CG32829	FBgn0052829	CG32829		Nlg4	FBgn0083975	CG34139
CG3335	FBgn0036018	CG3335		Pura	FBgn0035802	CG33275						l(2)09851	FBgn0022288	CG12792		CG32834	FBgn0052834	CG32834		CG34164	FBgn0085193	CG34164
CG33467	FBgn0053467	CG33467		CG33278	FBgn0053278	CG33278						lcs	FBgn0028583	CG12794		CG32846	FBgn0052846	CG32846		path	FBgn0036007	CG3424
luna	FBgn0040765	CG33473		CG33308	FBgn0250834	CG33308						Teh1	FBgn0037766	CG12806		CG32847	FBgn0052847	CG32847		dcma	FBgn0085380	CG34351
dpr4	FBgn0053512	CG33512		Sp212	FBgn0053329	CG33329						CG12857	FBgn0033963	CG12857		Alp7	FBgn0034710	CG3292		CG34355	FBgn0085384	CG34355
mim	FBgn0053558	CG33558		CG3335	FBgn0036018	CG3335						ND-B15	FBgn0033961	CG12859		CG32986	FBgn0052986	CG32986		CG34357	FBgn0085386	CG34357
CG3358	FBgn0033117	CG3358		qvr	FBgn0260499	CG33472						CG12861	FBgn0033953	CG12861		CG33003	FBgn0053003	CG33003		Glut4EF	FBgn0267336	CG34360
cana	FBgn0040233	CG33694		CG33475	FBgn0053475	CG33475						CG12866	FBgn0033955	CG12866		EndoU	FBgn0038381	CG3303		trv	FBgn0085391	CG34362
CG33774	FBgn0053774	CG33774		gfzf	FBgn0250732	CG33546						CG12869	FBgn0033943	CG12869		CG33093	FBgn0053093	CG33093		Shawl	FBgn0085395	CG34366
Cad88C	FBgn0038247	CG3389		CG3358	FBgn0033117	CG3358						ALiX	FBgn0086346	CG12876		Ppn	FBgn0003137	CG33103		smal	FBgn0085409	CG34380
CG33920	FBgn0053920	CG33920		mfas	FBgn0260745	CG3359						CG12877	FBgn0039544	CG12877		CG33111	FBgn0053111	CG33111		TrissinR	FBgn0085410	CG34381
Sema2b	FBgn0264273	CG33960		CG33695	FBgn0052831	CG33695						CG12885	FBgn0039523	CG12885		Gyc32E	FBgn0010197	CG33114		kmr	FBgn0085412	CG34383
kibra	FBgn0262127	CG33967		PGRP-LD	FBgn0260458	CG33717						CG12895	FBgn0033523	CG12895		Hr3	FBgn0000448	CG33183		dpr12	FBgn0085414	CG34385
nuf	FBgn0013718	CG33991		CG33723	FBgn0053723	CG33723						Ir47a	FBgn0033515	CG12900		Cdk7	FBgn0263237	CG3319		futsch	FBgn0259108	CG34387
betaTub60D	FBgn0003888	CG3401		CG33784	FBgn0053784	CG33784						Ndg	FBgn0026403	CG12908		CG3323	FBgn0029750	CG3323		cv-c	FBgn0285955	CG34389
CG3407	FBgn0031573	CG3407		CG33791	FBgn0035240	CG33791						CG12945	FBgn0037755	CG12945		Pkg21D	FBgn0000442	CG3324		Epac	FBgn0085421	CG34392
mld	FBgn0263490	CG34100		CheB74a	FBgn0261294	CG33924						CG12964	FBgn0034022	CG12964		Fign	FBgn0031519	CG3326		CG34393	FBgn0085422	CG34393
bs	FBgn0004101	CG3411		kay	FBgn0001297	CG33956						CG12971	FBgn0037078	CG12971		Pura	FBgn0035802	CG33275		GramD1B	FBgn0085423	CG34394
mRpL34	FBgn0083983	CG34147		Sema2b	FBgn0264273	CG33960						kune	FBgn0033032	CG1298		Cpr31A	FBgn0053302	CG33302		CG34404	FBgn0085433	CG34404
CG34183	FBgn0085212	CG34183		kibra	FBgn0262127	CG33967						p-cup	FBgn0030840	CG12993		Fer1	FBgn0037475	CG33323		Tlk	FBgn0283657	CG34412
SA	FBgn0020616	CG3423		CG33969	FBgn0053969	CG33969						CG13000	FBgn0030807	CG13000		CG33333	FBgn0053333	CG33333		spri	FBgn0085443	CG34414
Glut4EF	FBgn0267336	CG34360		CG3397	FBgn0037975	CG3397						CG13008	FBgn0030780	CG13008		CG33465	FBgn0053465	CG33465		sif	FBgn0085447	CG34418
Fili	FBgn0085397	CG34368		Vsx2	FBgn0263512	CG33980						CG13014	FBgn0030759	CG13014		luna	FBgn0040765	CG33473		CG34435	FBgn0085464	CG34435
smal	FBgn0085409	CG34380		CG33986	FBgn0053986	CG33986						CG13023	FBgn0036677	CG13023		CG33483	FBgn0053483	CG33483		Hdc	FBgn0005619	CG3454
cv-c	FBgn0285955	CG34389		bs	FBgn0004101	CG3411						CG13029	FBgn0036670	CG13029		CG33490	FBgn0053490	CG33490		CG3483	FBgn0035005	CG3483
CG34398	FBgn0085427	CG34398		side-III	FBgn0083949	CG34113						CG13040	FBgn0036608	CG13040		Dop2R	FBgn0053517	CG33517		inaD	FBgn0001263	CG3504
pan	FBgn0085432	CG34403		Nlg4	FBgn0083975	CG34139						CG13049	FBgn0036592	CG13049		Vmat	FBgn0260964	CG33528		CG3529	FBgn0035995	CG3529
mute	FBgn0085444	CG34415		Rpn8	FBgn0002787	CG3416						CG13055	FBgn0036583	CG13055		SmydA-8	FBgn0053548	CG33548		vimar	FBgn0022960	CG3572
CG34437	FBgn0085466	CG34437		CG34164	FBgn0085193	CG34164						CG13063	FBgn0036601	CG13063		CheB53a	FBgn0261292	CG33550		norpA	FBgn0262738	CG3620
osp	FBgn0003016	CG3479		CG34277	FBgn0085306	CG34277						CG1307	FBgn0026566	CG1307		mfas	FBgn0260745	CG3359		CG3625	FBgn0031245	CG3625
Hydr2	FBgn0014906	CG3488		CG34289	FBgn0085318	CG34289						CG13088	FBgn0032047	CG13088		CG33668	FBgn0053668	CG33668		Dll	FBgn0000157	CG3629
vir	FBgn0003977	CG3496		CG34292	FBgn0085321	CG34292						PIG-U	FBgn0032052	CG13089		CG33704	FBgn0053704	CG33704		CG3631	FBgn0038268	CG3631
CG3511	FBgn0035027	CG3511		CG34310	FBgn0085339	CG34310						tai	FBgn0041092	CG13109		gsb	FBgn0001148	CG3388		stc	FBgn0001978	CG3647
CG3520	FBgn0034859	CG3520		CG3434	FBgn0036000	CG3434						CG13116	FBgn0032139	CG13116		Cad88C	FBgn0038247	CG3389		CG3650	FBgn0035070	CG3650
Mtmr6	FBgn0028497	CG3530		CG34355	FBgn0085384	CG34355						CG13117	FBgn0032140	CG13117		CG33928	FBgn0053928	CG33928		CG3655	FBgn0040397	CG3655
GCC185	FBgn0037979	CG3532		trv	FBgn0085391	CG34362						TbCMF46	FBgn0032163	CG13125		CG33946	FBgn0047000	CG33946		fd59A	FBgn0004896	CG3668
CG3534	FBgn0038463	CG3534		side-V	FBgn0085400	CG34371						CG13127	FBgn0032176	CG13127		drd	FBgn0260006	CG33968		HIPP1	FBgn0037027	CG3680
pio	FBgn0020521	CG3541		Shrm	FBgn0085408	CG34379						CG13135	FBgn0032184	CG13135		Octbeta2R	FBgn0038063	CG33976		Ggamma30A	FBgn0267252	CG3694
AdSL	FBgn0038467	CG3590		dpr12	FBgn0085414	CG34385						CG13137	FBgn0032188	CG13137		CG34007	FBgn0054007	CG34007		CG3764	FBgn0036684	CG3764
Atg9	FBgn0034110	CG3615		cv-c	FBgn0285955	CG34389						Nse4	FBgn0032251	CG13142		BG642163	FBgn0083938	CG34102		a6	FBgn0023130	CG3771
Dl	FBgn0000463	CG3619		CG34393	FBgn0085422	CG34393						CG13144	FBgn0032260	CG13144		bs	FBgn0004101	CG3411		Adk1	FBgn0037995	CG3809
babos	FBgn0034724	CG3624		GramD1B	FBgn0085423	CG34394						ana3	FBgn0266111	CG13162		lobo	FBgn0083946	CG34110		Oatp30B	FBgn0032123	CG3811
Dll	FBgn0000157	CG3629		sif	FBgn0085447	CG34418						mIF3	FBgn0033712	CG13163		side-III	FBgn0083949	CG34113		KaiR1D	FBgn0038837	CG3822
CG3645	FBgn0031238	CG3645		Snoo	FBgn0085450	CG34421						Vha36-2	FBgn0033706	CG13167		CG34120	FBgn0083956	CG34120		NAT1	FBgn0010488	CG3845
stc	FBgn0001978	CG3647		Cpr35B	FBgn0028871	CG3474						CG1317	FBgn0035333	CG1317		CG34129	FBgn0083965	CG34129		CG3847	FBgn0029867	CG3847
CG3651	FBgn0032974	CG3651		CG3492	FBgn0035007	CG3492						CG13171	FBgn0033701	CG13171		Nlg4	FBgn0083975	CG34139		ph-d	FBgn0004860	CG3895
RpL23	FBgn0010078	CG3661		Hexim	FBgn0038251	CG3508						wash	FBgn0033692	CG13176		RunxA	FBgn0083981	CG34145		blot	FBgn0027660	CG3897
HIPP1	FBgn0037027	CG3680		CG3529	FBgn0035995	CG3529						CG13185	FBgn0033661	CG13185		CG34167	FBgn0085196	CG34167		mtTFB2	FBgn0037778	CG3910
MED23	FBgn0034795	CG3695		Dbp21E2	FBgn0086130	CG3561						exp	FBgn0033668	CG13188		CG34173	FBgn0085202	CG34173		Reph	FBgn0021800	CG3920
SERCA	FBgn0263006	CG3725		AdSL	FBgn0038467	CG3590						Zip48C	FBgn0033665	CG13189		CG34193	FBgn0085222	CG34193		CG3955	FBgn0033793	CG3955
Chd1	FBgn0250786	CG3733		Sf3b2	FBgn0031493	CG3605						Fdx2	FBgn0035529	CG1319		CG34194	FBgn0085223	CG34194		Baldspot	FBgn0260960	CG3971
MTF-1	FBgn0040305	CG3743		CG3611	FBgn0035069	CG3611						CG13192	FBgn0033653	CG13192		RhoGAP93B	FBgn0038853	CG3421		pigs	FBgn0029881	CG3973
esg	FBgn0287768	CG3758		blw	FBgn0011211	CG3612						CG13203	FBgn0033628	CG13203		CG34222	FBgn0250822	CG34222		Maf1	FBgn0267861	CG40196
Vha68-2	FBgn0263598	CG3762		CG3625	FBgn0031245	CG3625						CG13204	FBgn0033627	CG13204		CG34259	FBgn0085288	CG34259		Yeti	FBgn0267398	CG40218
a6	FBgn0023130	CG3771		Dll	FBgn0000157	CG3629						Cpr47Ef	FBgn0033603	CG13214		CG34277	FBgn0085306	CG34277		RpI135	FBgn0003278	CG4033
mRpL28	FBgn0031660	CG3782		CG3634	FBgn0037026	CG3634						zfh1	FBgn0004606	CG1322		CG34289	FBgn0085318	CG34289		egl	FBgn0000562	CG4051
Oatp30B	FBgn0032123	CG3811		stc	FBgn0001978	CG3647						Vhl	FBgn0041174	CG13221		CG34302	FBgn0085331	CG34302		CG4074	FBgn0037017	CG4074
Nup214	FBgn0010660	CG3820		CG3652	FBgn0031600	CG3652						Cpr47Ee	FBgn0033602	CG13222		CG34312	FBgn0085341	CG34312		CG4080	FBgn0035983	CG4080
AspRS	FBgn0002069	CG3821		fd59A	FBgn0004896	CG3668						CG13231	FBgn0033580	CG13231		CG34316	FBgn0085345	CG34316		Orc3	FBgn0005654	CG4088
Sdr	FBgn0038279	CG3837		HIPP1	FBgn0037027	CG3680						CG1324	FBgn0031129	CG1324		CG34342	FBgn0085371	CG34342		beat-IIb	FBgn0038494	CG4135
Oamb	FBgn0024944	CG3856		Ggamma30A	FBgn0267252	CG3694						CG13258	FBgn0032582	CG13258		trv	FBgn0085391	CG34362		Col4a1	FBgn0000299	CG4145
RabX1	FBgn0015372	CG3870		Naprt	FBgn0031589	CG3714						Cyt-c-d	FBgn0086907	CG13263		ppk9	FBgn0085398	CG34369		lace	FBgn0002524	CG4162
GlcAT-S	FBgn0032135	CG3881		CG3744	FBgn0039240	CG3744						CG13272	FBgn0086673	CG13272		CG34377	FBgn0263117	CG34377		vig	FBgn0024183	CG4170
Su(z)2	FBgn0265623	CG3905		a6	FBgn0023130	CG3771						CG13280	FBgn0032609	CG13280		CG34382	FBgn0085411	CG34382		CG4198	FBgn0029753	CG4198
Reph	FBgn0021800	CG3920		Gdn1	FBgn0038692	CG3773						CG13293	FBgn0035677	CG13293		futsch	FBgn0259108	CG34387		CG42238	FBgn0250867	CG42238
CAH7	FBgn0037788	CG3940		Oatp30B	FBgn0032123	CG3811						Sf3b6	FBgn0035692	CG13298		natalisin	FBgn0085417	CG34388		Ndae1	FBgn0259111	CG42253
Invadolysin	FBgn0086359	CG3953		AspRS	FBgn0002069	CG3821						Ccp84Ae	FBgn0004779	CG1330		DIP-delta	FBgn0085420	CG34391		CG42260	FBgn0259145	CG42260
pelo	FBgn0011207	CG3959		Glut3	FBgn0015230	CG3853						CG13305	FBgn0035921	CG13305		Epac	FBgn0085421	CG34392		CG42268	FBgn0259163	CG42268
Tat	FBgn0035989	CG3967		gcm2	FBgn0019809	CG3858						CG13325	FBgn0033792	CG13325		CG34396	FBgn0085425	CG34396		mnb	FBgn0259168	CG42273
PolD3	FBgn0283467	CG3975		CG3860	FBgn0034951	CG3860						cid	FBgn0040477	CG13329		CG34417	FBgn0085446	CG34417		alpha-Man-Ia	FBgn0259170	CG42275
pnr	FBgn0003117	CG3978		RabX1	FBgn0015372	CG3870						CG13331	FBgn0033850	CG13331		CG34435	FBgn0085464	CG34435		corn	FBgn0259173	CG42278
TppII	FBgn0020370	CG3991		blot	FBgn0027660	CG3897						CG13332	FBgn0033851	CG13332		Pxd	FBgn0004577	CG3477		bun	FBgn0259176	CG42281
zf30C	FBgn0270924	CG3998		bark	FBgn0031571	CG3921						CG13334	FBgn0033856	CG13334		CG3483	FBgn0035005	CG3483		cno	FBgn0259212	CG42312
CG40191	FBgn0058191	CG40191		CG3955	FBgn0033793	CG3955						S-Lap7	FBgn0033868	CG13340		CG3494	FBgn0035008	CG3494		side-II	FBgn0259213	CG42313
Yeti	FBgn0267398	CG40218		TTLL4B	FBgn0031574	CG3964						Rpn13	FBgn0033886	CG13349		vir	FBgn0003977	CG3496		Ir93a	FBgn0259215	CG42315
Stlk	FBgn0046692	CG40293		PolD3	FBgn0283467	CG3975						CG13358	FBgn0026874	CG13358		CG3526	FBgn0040355	CG3526		Doa	FBgn0265998	CG42320
Abl	FBgn0000017	CG4032		pnr	FBgn0003117	CG3978						Hmt4-20	FBgn0025639	CG13363		Slh	FBgn0264978	CG3539		ATP8A	FBgn0259221	CG42321
Set1	FBgn0040022	CG40351		srp	FBgn0003507	CG3992						CG13366	FBgn0025633	CG13366		CG3557	FBgn0031423	CG3557		CG42322	FBgn0259222	CG42322
Tmtc3	FBgn0020312	CG4050		ZnT35C	FBgn0028516	CG3994						hydra	FBgn0031128	CG1338		bi	FBgn0000179	CG3578		CG42326	FBgn0259226	CG42326
egl	FBgn0000562	CG4051		zf30C	FBgn0270924	CG3998						CG13384	FBgn0032036	CG13384		CG3598	FBgn0025645	CG3598		CG42331	FBgn0259233	CG42331
ValRS	FBgn0027079	CG4062		Maf1	FBgn0267861	CG40196						CG13386	FBgn0032040	CG13386		CG3631	FBgn0038268	CG3631		Ten-a	FBgn0267001	CG42338
Cyp4e3	FBgn0015035	CG4105		Yeti	FBgn0267398	CG40218						Akap200	FBgn0027932	CG13388		stc	FBgn0001978	CG3647		CG42340	FBgn0259242	CG42340
ex	FBgn0004583	CG4114		CG4022	FBgn0035986	CG4022						CG13398	FBgn0032042	CG13398		CG3649	FBgn0034785	CG3649		Pka-R1	FBgn0259243	CG42341
mbf1	FBgn0262732	CG4143		Snap25	FBgn0011288	CG40452						D12	FBgn0027490	CG13400		CG3650	FBgn0035070	CG3650		brp	FBgn0259246	CG42344
lace	FBgn0002524	CG4162		CG40498	FBgn0069969	CG40498						Aasdh	FBgn0027780	CG13401		kirre	FBgn0028369	CG3653		CG42375	FBgn0259721	CG42375
vig	FBgn0024183	CG4170		ftz-f1	FBgn0001078	CG4059						CG13404	FBgn0030559	CG13404		Cyp4d1	FBgn0005670	CG3656		CG4238	FBgn0031384	CG4238
CG4213	FBgn0031251	CG4213		ValRS	FBgn0027079	CG4062						CG13407	FBgn0038931	CG13407		fd59A	FBgn0004896	CG3668		mtgo	FBgn0259735	CG42389
CG42232	FBgn0250754	CG42232		ebi	FBgn0263933	CG4063						RpI12	FBgn0038903	CG13418		Cpr67B	FBgn0035985	CG3672		wech	FBgn0259745	CG42396
CG42238	FBgn0250867	CG42238		beat-IIb	FBgn0038494	CG4135						CG1344	FBgn0027507	CG1344		CG3748	FBgn0032110	CG3748		CG42450	FBgn0259927	CG42450
Hmt-1	FBgn0038376	CG4225		Vsx1	FBgn0263511	CG4136						CG13442	FBgn0034546	CG13442		Vha68-2	FBgn0263598	CG3762		CG42534	FBgn0260487	CG42534
lqfR	FBgn0261279	CG42250		wek	FBgn0001990	CG4148						CG13449	FBgn0036520	CG13449		Gdn1	FBgn0038692	CG3773		CG42540	FBgn0260657	CG42540
Dscam2	FBgn0265296	CG42256		lace	FBgn0002524	CG4162						Tdrd3	FBgn0036450	CG13472		Cpr30B	FBgn0032125	CG3818		CG42568	FBgn0260770	CG42568
CG42268	FBgn0259163	CG42268		vig	FBgn0024183	CG4170						CG13473	FBgn0036442	CG13473		Glut3	FBgn0015230	CG3853		2mit	FBgn0260793	CG42573
rn	FBgn0267337	CG42277		spel1	FBgn0015546	CG4215						HGTX	FBgn0040318	CG13475		Mdr49	FBgn0004512	CG3879		CG42577	FBgn0260867	CG42577
corn	FBgn0259173	CG42278		CG42238	FBgn0250867	CG42238						Lk	FBgn0028418	CG13480		Drl-2	FBgn0033791	CG3915		Cad86C	FBgn0261053	CG42601
bun	FBgn0259176	CG42281		fid	FBgn0259146	CG42261						CG13500	FBgn0034683	CG13500		dx	FBgn0000524	CG3929		plx	FBgn0261261	CG42612
5PtaseI	FBgn0259178	CG42283		CG42268	FBgn0259163	CG42268						CG13502	FBgn0034692	CG13502		wmd	FBgn0034876	CG3957		Cul3	FBgn0261268	CG42616
grh	FBgn0259211	CG42311		Nedd4	FBgn0259174	CG42279						Obp59a	FBgn0034766	CG13517		pnr	FBgn0003117	CG3978		mRpS34	FBgn0285951	CG42648
cno	FBgn0259212	CG42312		bun	FBgn0259176	CG42281						robo1	FBgn0005631	CG13521		CG3982	FBgn0035988	CG3982		rdgA	FBgn0261549	CG42667
Csk	FBgn0262081	CG42317		CG4229	FBgn0036639	CG4229						CG13531	FBgn0034786	CG13531		srp	FBgn0003507	CG3992		CG42668	FBgn0261550	CG42668
Doa	FBgn0265998	CG42320		cno	FBgn0259212	CG42312						CG1354	FBgn0030151	CG1354		ZnT35C	FBgn0028516	CG3994		CG42682	FBgn0261568	CG42682
CG42331	FBgn0259233	CG42331		Csk	FBgn0262081	CG42317						Ice1	FBgn0034853	CG13550		yki	FBgn0034970	CG4005		pdm3	FBgn0261588	CG42698
Pka-R1	FBgn0259243	CG42341		Doa	FBgn0265998	CG42320						CG13558	FBgn0034869	CG13558		Maf1	FBgn0267861	CG40196		CG42700	FBgn0261611	CG42700
Caf1-55	FBgn0263979	CG4236		CG42324	FBgn0259224	CG42324						CG13562	FBgn0034928	CG13562		TwdlW	FBgn0038487	CG4060		Oaz	FBgn0284250	CG42702
ArfGAP1	FBgn0020655	CG4237		CG42326	FBgn0259226	CG42326						spag	FBgn0015544	CG13570		pug	FBgn0020385	CG4067		GLS	FBgn0261625	CG42708
CG4238	FBgn0031384	CG4238		CG42335	FBgn0259237	CG42335						Ir60a	FBgn0034994	CG13576		CG4073	FBgn0037827	CG4073		SLO2	FBgn0261698	CG42732
tal-AA	FBgn0259733	CG42387		brp	FBgn0259246	CG42344						CG13577	FBgn0034998	CG13577		TTLL15	FBgn0037838	CG4089		Msp300	FBgn0261836	CG42768
CG42445	FBgn0259916	CG42445		CG42367	FBgn0259713	CG42367						CG1358	FBgn0033196	CG1358		Cyp12c1	FBgn0036806	CG4120		aPKC	FBgn0261854	CG42783
CG42542	FBgn0260659	CG42542		ArfGAP1	FBgn0020655	CG4237						Crtp	FBgn0029501	CG13580		beat-IIb	FBgn0038494	CG4135		CG42784	FBgn0263354	CG42784
CG42568	FBgn0260770	CG42568		Nepl6	FBgn0259716	CG42370						ITP	FBgn0035023	CG13586		Ankrd49	FBgn0261881	CG4140		CG42789	FBgn0261860	CG42789
Stat92E	FBgn0016917	CG4257		CG42375	FBgn0259721	CG42375						CG13587	FBgn0035031	CG13587		Col4a1	FBgn0000299	CG4145		5-HT2B	FBgn0261929	CG42796
2mit	FBgn0260793	CG42573		CG4238	FBgn0031384	CG4238						CG13607	FBgn0039151	CG13607		CG4198	FBgn0029753	CG4198		trh	FBgn0262139	CG42865
AP-2alpha	FBgn0264855	CG4260		mtgo	FBgn0259735	CG42389						mRpS24	FBgn0039159	CG13608		CG4213	FBgn0031251	CG4213		MtnE	FBgn0262146	CG42872
Cad86C	FBgn0261053	CG42601		CG42496	FBgn0260222	CG42496						CG13627	FBgn0039217	CG13627		CG42235	FBgn0250757	CG42235		CG43085	FBgn0262531	CG43085
plx	FBgn0261261	CG42612		CG42516	FBgn0260390	CG42516						blow	FBgn0004133	CG1363		DCX-EMAP	FBgn0259099	CG42247		cic	FBgn0262582	CG43122
Cul3	FBgn0261268	CG42616		MED9	FBgn0260401	CG42517						CG13634	FBgn0039224	CG13634		Dscam2	FBgn0265296	CG42256		pyd	FBgn0262614	CG43140
CG42637	FBgn0261360	CG42637		CG42540	FBgn0260657	CG42540						CG13643	FBgn0040601	CG13643		rn	FBgn0267337	CG42277		Nuak	FBgn0262617	CG43143
CG42663	FBgn0261545	CG42663		larp	FBgn0261618	CG42551						mah	FBgn0285912	CG13646		bun	FBgn0259176	CG42281		jvl	FBgn0263929	CG43162
Exn	FBgn0261547	CG42665		Stat92E	FBgn0016917	CG4257						danr	FBgn0039283	CG13651		Ir7f	FBgn0259188	CG42292		CG43206	FBgn0262842	CG43206
ps	FBgn0261552	CG42670		MCPH1	FBgn0260959	CG42572						CG13685	FBgn0035816	CG13685		Mlp60A	FBgn0259209	CG42309		Gfrl	FBgn0262869	CG43224
CG42671	FBgn0261553	CG42671		2mit	FBgn0260793	CG42573						BBS8	FBgn0031255	CG13691		grh	FBgn0259211	CG42311		lute	FBgn0262871	CG43226
CG42673	FBgn0261555	CG42673		Hel89B	FBgn0022787	CG4261						CG1371	FBgn0033482	CG1371		cno	FBgn0259212	CG42312		milt	FBgn0262872	CG43227
Lmpt	FBgn0261565	CG42679		plx	FBgn0261261	CG42612						yl	FBgn0004649	CG1372		CG42323	FBgn0259223	CG42323		cnc	FBgn0262975	CG43286
Pitslre	FBgn0016696	CG4268		Exn	FBgn0261547	CG42665						CG13728	FBgn0036716	CG13728		C3G	FBgn0259228	CG42328		CG43307	FBgn0262999	CG43307
CG4270	FBgn0031407	CG4270		CG42668	FBgn0261550	CG42668						tsh	FBgn0003866	CG1374		CG42331	FBgn0259233	CG42331		HSPBAP1	FBgn0263025	CG43320
CG42700	FBgn0261611	CG42700		wb	FBgn0261563	CG42677						CG13744	FBgn0033363	CG13744		Pka-R1	FBgn0259243	CG42341		CG43324	FBgn0263029	CG43324
CG42741	FBgn0261705	CG42741		pdm3	FBgn0261588	CG42698						CG13747	FBgn0033364	CG13747		Nepl6	FBgn0259716	CG42370		rux	FBgn0003302	CG4336
pre-mod(mdg4)-U	FBgn0261845	CG42777		Oaz	FBgn0284250	CG42702						Pdfr	FBgn0260753	CG13758		CG42383	FBgn0259729	CG42383		CG4341	FBgn0028481	CG4341
aPKC	FBgn0261854	CG42783		CG42711	FBgn0261628	CG42711						Smyd3	FBgn0011566	CG13761		CG42446	FBgn0259917	CG42446		hts	FBgn0263391	CG43443
d	FBgn0262029	CG42840		aPKC	FBgn0261854	CG42783						CG13766	FBgn0031834	CG13766		CG42534	FBgn0260487	CG42534		Tet	FBgn0263392	CG43444
CG42853	FBgn0262100	CG42853		CadN2	FBgn0262018	CG42829						Nlg2	FBgn0031866	CG13772		CG42580	FBgn0260870	CG42580		mAChR-A	FBgn0000037	CG4356
Sik3	FBgn0262103	CG42856		CG42853	FBgn0262100	CG42853						CG13773	FBgn0042092	CG13773		Sfp78E	FBgn0261059	CG42607		CG43689	FBgn0263772	CG43689
CG4294	FBgn0034742	CG4294		f	FBgn0262111	CG42864						Mnn1	FBgn0031885	CG13778		plx	FBgn0261261	CG42612		CG43707	FBgn0263846	CG43707
CG43111	FBgn0262571	CG43111		trh	FBgn0262139	CG42865						tll	FBgn0003720	CG1378		Ir75b	FBgn0261402	CG42643		esn	FBgn0263934	CG43722
pyd	FBgn0262614	CG43140		CG4294	FBgn0034742	CG4294						Pvf2	FBgn0031888	CG13780		CG42662	FBgn0261538	CG42662		CG43736	FBgn0263993	CG43736
Nuak	FBgn0262617	CG43143		bru2	FBgn0262475	CG43065						CG13784	FBgn0031897	CG13784		pdm3	FBgn0261588	CG42698		Ack-like	FBgn0263998	CG43741
jvl	FBgn0263929	CG43162		CG43102	FBgn0262562	CG43102						yellow-g2	FBgn0035328	CG13804		CG42699	FBgn0261610	CG42699		MsR2	FBgn0264002	CG43745
CG43163	FBgn0262719	CG43163		CG43107	FBgn0262567	CG43107						Oseg2	FBgn0035317	CG13809		Oaz	FBgn0284250	CG42702		Hmx	FBgn0264005	CG43748
lute	FBgn0262871	CG43226		cic	FBgn0262582	CG43122						RpLP0-like	FBgn0033485	CG1381		B9d2	FBgn0261683	CG42730		dysc	FBgn0264006	CG43749
milt	FBgn0262872	CG43227		SmydA-3	FBgn0262599	CG43129						CG13810	FBgn0035313	CG13810		CG42733	FBgn0261686	CG42733		sli	FBgn0264089	CG43758
cnc	FBgn0262975	CG43286		pyd	FBgn0262614	CG43140						Cow	FBgn0039054	CG13830		Msp300	FBgn0261836	CG42768		wrm1	FBgn0264302	CG43780
CG43322	FBgn0263027	CG43322		Nuak	FBgn0262617	CG43143						pinta	FBgn0038966	CG13848		aPKC	FBgn0261854	CG42783		CG43850	FBgn0264432	CG43850
CG43341	FBgn0263046	CG43341		CG43203	FBgn0262839	CG43203						CG13862	FBgn0038942	CG13862		CG42784	FBgn0263354	CG42784		ab	FBgn0264442	CG43860
CG43366	FBgn0263109	CG43366		lute	FBgn0262871	CG43226						MED8	FBgn0034503	CG13867		CG42832	FBgn0262021	CG42832		CG43867	FBgn0264449	CG43867
CG43367	FBgn0263110	CG43367		milt	FBgn0262872	CG43227						CG13868	FBgn0034501	CG13868		f	FBgn0262111	CG42864		CG4390	FBgn0038771	CG4390
scrib	FBgn0263289	CG43398		HSPBAP1	FBgn0263025	CG43320						CG1387	FBgn0030033	CG1387		MtnE	FBgn0262146	CG42872		fne	FBgn0086675	CG4396
hts	FBgn0263391	CG43443		CG43324	FBgn0263029	CG43324						CG13870	FBgn0034506	CG13870		CG42876	FBgn0262150	CG42876		RhoGEF3	FBgn0264707	CG43976
Tet	FBgn0263392	CG43444		CG43340	FBgn0263077	CG43340						CG13871	FBgn0034502	CG13871		CG4301	FBgn0030747	CG4301		Vti1b	FBgn0264751	CG44009
CG4364	FBgn0032138	CG4364		BtbVII	FBgn0263108	CG43365						Dci	FBgn0035169	CG13890		CG43054	FBgn0262356	CG43054		Hph	FBgn0264785	CG44015
eIF2gamma	FBgn0263740	CG43665		CG4341	FBgn0028481	CG4341						mat	FBgn0035176	CG13905		CG43057	FBgn0262359	CG43057		jp	FBgn0032129	CG4405
CG43689	FBgn0263772	CG43689		slbo	FBgn0005638	CG4354						nerfin-1	FBgn0028999	CG13906		CG43115	FBgn0262575	CG43115		CG44090	FBgn0264899	CG44090
fok	FBgn0263773	CG43690		cpo	FBgn0263995	CG43738						CG13921	FBgn0035267	CG13921		CG43120	FBgn0262580	CG43120		pHCl-1	FBgn0264908	CG44099
sick	FBgn0263873	CG43720		CG4374	FBgn0039078	CG4374						GC	FBgn0035245	CG13927		CG43137	FBgn0262611	CG43137		Piezo	FBgn0264953	CG44122
esn	FBgn0263934	CG43722		bru3	FBgn0264001	CG43744						CG1394	FBgn0030277	CG1394		Sb	FBgn0003319	CG4316		Src42A	FBgn0264959	CG44128
CG4374	FBgn0039078	CG4374		MsR2	FBgn0264002	CG43745						CG13972	FBgn0039522	CG13972		nw	FBgn0283508	CG43164		Strn-Mlck	FBgn0265045	CG44162
sli	FBgn0264089	CG43758		Hmx	FBgn0264005	CG43748						Gr98a	FBgn0039520	CG13976		Cyp4d8	FBgn0015033	CG4321		Atf-2	FBgn0265193	CG44246
CG43783	FBgn0264305	CG43783		CG43774	FBgn0264296	CG43774						CG13982	FBgn0031811	CG13982		lute	FBgn0262871	CG43226		CG44257	FBgn0265197	CG44257
S	FBgn0003310	CG4385		CG43850	FBgn0264432	CG43850						CG13989	FBgn0031786	CG13989		Dic2	FBgn0038797	CG4323		cbt	FBgn0043364	CG4427
CG43897	FBgn0264489	CG43897		Mtpalpha	FBgn0028479	CG4389						LRR	FBgn0033212	CG1399		CG43235	FBgn0262880	CG43235		rad	FBgn0265597	CG44424
CG4390	FBgn0038771	CG4390		CG43897	FBgn0264489	CG43897						CG13991	FBgn0031785	CG13991		CG43237	FBgn0262882	CG43237		sno	FBgn0265630	CG44436
RhoGEF3	FBgn0264707	CG43976		CG4393	FBgn0039075	CG4393						CG13994	FBgn0031772	CG13994		CG43254	FBgn0262899	CG43254		px	FBgn0003175	CG4444
CG43980	FBgn0264711	CG43980		Fife	FBgn0264606	CG43955						CG13996	FBgn0031763	CG13996		CG4328	FBgn0036274	CG4328		Hs6st	FBgn0038755	CG4451
btsz	FBgn0266756	CG44012		RhoGEF3	FBgn0264707	CG43976						CG13999	FBgn0031753	CG13999		cnc	FBgn0262975	CG43286		Nna1	FBgn0265726	CG44533
Hph	FBgn0264785	CG44015		CG43980	FBgn0264711	CG43980						CG14000	FBgn0031749	CG14000		CG43288	FBgn0262980	CG43288		CG4467	FBgn0039064	CG4467
CG44085	FBgn0264894	CG44085		btsz	FBgn0266756	CG44012						CG14006	FBgn0031733	CG14006		CG43294	FBgn0262986	CG43294		CG44774	FBgn0266000	CG44774
RapGAP1	FBgn0264895	CG44086		CG44013	FBgn0264775	CG44013						Cul5	FBgn0039632	CG1401		CG43312	FBgn0263004	CG43312		CG44837	FBgn0266100	CG44837
ATPsynCF6	FBgn0016119	CG4412		Hph	FBgn0264785	CG44015						CG14011	FBgn0031722	CG14011		CG43338	FBgn0263079	CG43338		Tgs1	FBgn0266195	CG44890
Src42A	FBgn0264959	CG44128		CG44102	FBgn0264911	CG44102						CG14024	FBgn0031697	CG14024		CG4341	FBgn0028481	CG4341		noc	FBgn0005771	CG4491
CG44158	FBgn0265041	CG44158		Src42A	FBgn0264959	CG44128						Bsg25D	FBgn0000228	CG14025		Ncc69	FBgn0036279	CG4357		CG45002	FBgn0266354	CG45002
Cdep	FBgn0265082	CG44193		koi	FBgn0265003	CG44154						tkv	FBgn0003716	CG14026		Myo10A	FBgn0263705	CG43657		IP3K2	FBgn0283680	CG45017
CG44243	FBgn0265178	CG44243		Strn-Mlck	FBgn0265045	CG44162						vri	FBgn0016076	CG14029		CG43691	FBgn0263774	CG43691		Pde8	FBgn0266377	CG45019
Atf-2	FBgn0265193	CG44246		CG4424	FBgn0038765	CG4424						2021-09-01	FBgn0011710	CG1403		Hmx	FBgn0264005	CG43748		CG45050	FBgn0266410	CG45050
PGRP-LC	FBgn0035976	CG4432		Atf-2	FBgn0265193	CG44246						Bub1	FBgn0031696	CG14030		CG43796	FBgn0264340	CG43796		Kr-h1	FBgn0266450	CG45074
px	FBgn0003175	CG4444		CG44261	FBgn0265201	CG44261						qtc	FBgn0028572	CG14039		CG43915	FBgn0264516	CG43915		CG45087	FBgn0266488	CG45087
Hs6st	FBgn0038755	CG4451		S-Lap8	FBgn0034132	CG4439						Ran	FBgn0020255	CG1404		Hr4	FBgn0264562	CG43934		Svil	FBgn0266696	CG45186
CG44623	FBgn0265834	CG44623		Bx	FBgn0265598	CG44425						CG14042	FBgn0260451	CG14042		RhoGEF3	FBgn0264707	CG43976		aos	FBgn0004569	CG4531
pre-mod(mdg4)-K	FBgn0266173	CG44879		CG44435	FBgn0265627	CG44435						mRpL14	FBgn0040389	CG14048		CG43980	FBgn0264711	CG43980		ClpX	FBgn0038745	CG4538
Tgs1	FBgn0266195	CG44890		px	FBgn0003175	CG4444						CG14071	FBgn0032312	CG14071		Rgk1	FBgn0264753	CG44011		Dyrk2	FBgn0016930	CG4551
noc	FBgn0005771	CG4491		mRRF1	FBgn0035980	CG4447						CG14075	FBgn0036835	CG14075		btsz	FBgn0266756	CG44012		Idgf3	FBgn0020414	CG4559
MICU1	FBgn0031893	CG4495		CG44837	FBgn0266100	CG44837						Mkp3	FBgn0036844	CG14080		jp	FBgn0032129	CG4405		mEFG1	FBgn0263133	CG4567
CG4497	FBgn0031895	CG4497		Tgs1	FBgn0266195	CG44890						CG14095	FBgn0036870	CG14095		CG44163	FBgn0265046	CG44163		CG4577	FBgn0031306	CG4577
sima	FBgn0266411	CG45051		sima	FBgn0266411	CG45051						CG14137	FBgn0036178	CG14137		Snp	FBgn0265192	CG44248		Myo81F	FBgn0267431	CG45784
wake	FBgn0266418	CG45058		wake	FBgn0266418	CG45058						CG14147	FBgn0036112	CG14147		Fatp2	FBgn0265187	CG44252		Nup154	FBgn0021761	CG4579
Svil	FBgn0266696	CG45186		CG45069	FBgn0266439	CG45069						CG14174	FBgn0036036	CG14174		CG44259	FBgn0265199	CG44259		CG4593	FBgn0029929	CG4593
Dyrk2	FBgn0016930	CG4551		Kr-h1	FBgn0266450	CG45074						Use1	FBgn0035965	CG14181		CG44271	FBgn0265257	CG44271		pre-mod(mdg4)-AA	FBgn0267650	CG45988
CG4553	FBgn0039336	CG4553		Svil	FBgn0266696	CG45186						CG14184	FBgn0036932	CG14184		PGRP-LC	FBgn0035976	CG4432		Tpr2	FBgn0032586	CG4599
CG4554	FBgn0034734	CG4554		CG45544	FBgn0267104	CG45544						CG14186	FBgn0036935	CG14186		yin	FBgn0265575	CG44402		alpha-Man-IIb	FBgn0026616	CG4606
fzo	FBgn0011596	CG4568		mEFG1	FBgn0263133	CG4567						Slu7	FBgn0039626	CG1420		rad	FBgn0265597	CG44424		unk	FBgn0004395	CG4620
Plc21C	FBgn0004611	CG4574		Plc21C	FBgn0004611	CG4574						Shawn	FBgn0031039	CG14209		Bx	FBgn0265598	CG44425		fz4	FBgn0027342	CG4626
Ire1	FBgn0261984	CG4583		Nup154	FBgn0021761	CG4579						Rcd-1	FBgn0031047	CG14213		CG44437	FBgn0265629	CG44437		CG46339	FBgn0285963	CG46339
Tpr2	FBgn0032586	CG4599		CG4596	FBgn0037849	CG4596						Elys	FBgn0031052	CG14215		CG4467	FBgn0039064	CG4467		CG46385	FBgn0286778	CG46385
fax	FBgn0014163	CG4609		CG4622	FBgn0035021	CG4622						Tao	FBgn0031030	CG14217		CG44836	FBgn0266099	CG44836		MICU3	FBgn0038735	CG4662
CG4610	FBgn0034735	CG4610		CG46280	FBgn0283438	CG46280						et	FBgn0031055	CG14225		CG44837	FBgn0266100	CG44837		Wnt4	FBgn0010453	CG4698
PRAS40	FBgn0267824	CG46146		CG46308	FBgn0284224	CG46308						CG14227	FBgn0031058	CG14227		Tgs1	FBgn0266195	CG44890		Wdr59	FBgn0032339	CG4705
Fatp1	FBgn0267828	CG46149		CG46318	FBgn0284234	CG46318						CG14234	FBgn0031065	CG14234		CG44956	FBgn0266261	CG44956		Ask1	FBgn0014006	CG4720
CG4622	FBgn0035021	CG4622		AlaRS-m	FBgn0028962	CG4633						CG14238	FBgn0039429	CG14238		Pde8	FBgn0266377	CG45019		Agpat3	FBgn0036623	CG4729
SCAR	FBgn0041781	CG4636		RpL13	FBgn0011272	CG4651						CG14245	FBgn0039452	CG14245		CG45076	FBgn0266446	CG45076		CG4744	FBgn0033834	CG4744
CG46385	FBgn0286778	CG46385		MICU3	FBgn0038735	CG4662						CG14247	FBgn0039454	CG14247		tau	FBgn0266579	CG45110		bol	FBgn0011206	CG4760
RpL13	FBgn0011272	CG4651		Pex13	FBgn0033812	CG4663						TwdlQ	FBgn0039448	CG14250		Svil	FBgn0266696	CG45186		CG4788	FBgn0032354	CG4788
Srp54k	FBgn0010747	CG4659		Qsox1	FBgn0033814	CG4670						CG14252	FBgn0039462	CG14252		Ttc26	FBgn0038358	CG4525		CG4793	FBgn0028514	CG4793
MICU3	FBgn0038735	CG4662		Serinc	FBgn0028399	CG4672						TwdlC	FBgn0039469	CG14254		iav	FBgn0086693	CG4536		RecQ5	FBgn0027375	CG4879
Ssadh	FBgn0039349	CG4685		Ssadh	FBgn0039349	CG4685						CG14265	FBgn0040393	CG14265		CG4557	FBgn0029912	CG4557		Tm1	FBgn0003721	CG4898
Sema2a	FBgn0011260	CG4700		Sema2a	FBgn0011260	CG4700						SecS	FBgn0037347	CG1427		Acp32CD	FBgn0023415	CG4605		Syn2	FBgn0034135	CG4905
Wdr59	FBgn0032339	CG4705		Arc42	FBgn0038742	CG4703						Mef2	FBgn0011656	CG1429		CG4607	FBgn0029932	CG4607		brn	FBgn0000221	CG4934
squ	FBgn0267347	CG4711		loopin-1	FBgn0259795	CG4750						CG14292	FBgn0038658	CG14292		CG4613	FBgn0036427	CG4613		dac	FBgn0005677	CG4952
Trp1	FBgn0011584	CG4758		CG4751	FBgn0032348	CG4751						Epg5	FBgn0038651	CG14299		CG4650	FBgn0032549	CG4650		dally	FBgn0263930	CG4974
CLS	FBgn0039360	CG4774		Tektin-A	FBgn0028902	CG4767						CG14314	FBgn0038581	CG14314		lmd	FBgn0039039	CG4677		kek2	FBgn0015400	CG4977
obst-B	FBgn0027600	CG4778		Rcd2	FBgn0037012	CG4786						CG14316	FBgn0038567	CG14316		Gagr	FBgn0036627	CG4680		msps	FBgn0027948	CG5000
Dcr-1	FBgn0039016	CG4792		Cpn	FBgn0261714	CG4795						CG14322	FBgn0038532	CG14322		Sema2a	FBgn0011260	CG4700		CG5004	FBgn0260748	CG5004
eIF3d2	FBgn0037994	CG4810		eIF3d2	FBgn0037994	CG4810						CG14325	FBgn0038531	CG14325		mAcon2	FBgn0037862	CG4706		Vap33	FBgn0029687	CG5014
Cog1	FBgn0037998	CG4848		Cpr72Ea	FBgn0036617	CG4818						beat-IIa	FBgn0038498	CG14334		kni	FBgn0001320	CG4717		CG5079	FBgn0039346	CG5079
CG4854	FBgn0038766	CG4854		beat-Ic	FBgn0028644	CG4838						CG1434	FBgn0030554	CG1434		Ugt302E1	FBgn0040257	CG4739		l(3)psg2	FBgn0035617	CG5146
CG4858	FBgn0037011	CG4858		psidin	FBgn0243511	CG4845						CG14340	FBgn0031302	CG14340		l(2)10685	FBgn0283525	CG4749		CG5151	FBgn0036576	CG5151
salr	FBgn0000287	CG4881		tyf	FBgn0026083	CG4857						haf	FBgn0261509	CG14351		CG4766	FBgn0027546	CG4766		TfIIA-S	FBgn0013347	CG5163
CG4882	FBgn0025336	CG4882		RecQ5	FBgn0027375	CG4879						CG14367	FBgn0038170	CG14367		obst-B	FBgn0027600	CG4778		Pgm1	FBgn0003076	CG5165
CG4896	FBgn0031319	CG4896		CG4882	FBgn0025336	CG4882						CG14370	FBgn0038158	CG14370		CG4788	FBgn0032354	CG4788		CG5181	FBgn0031909	CG5181
Tm1	FBgn0003721	CG4898		cyp33	FBgn0028382	CG4886						CG14383	FBgn0038102	CG14383		Cpr72Ea	FBgn0036617	CG4818		Dad	FBgn0020493	CG5201
MESR4	FBgn0034240	CG4903		Ca-alpha1D	FBgn0001991	CG4894						CG14395	FBgn0038073	CG14395		BicC	FBgn0000182	CG4824		STUB1	FBgn0027052	CG5203
CG4911	FBgn0035959	CG4911		Tm1	FBgn0003721	CG4898						CG1441	FBgn0033464	CG1441		CG4835	FBgn0035607	CG4835		obe	FBgn0038344	CG5205
CG4960	FBgn0039371	CG4960		SerRS-m	FBgn0021750	CG4938						CG14414	FBgn0030571	CG14414		beat-Ic	FBgn0028644	CG4838		bon	FBgn0023097	CG5206
mfrn	FBgn0039561	CG4963		CG4951	FBgn0039563	CG4951						CG14421	FBgn0029644	CG14421		psidin	FBgn0243511	CG4845		CG5213	FBgn0038345	CG5213
HPS4	FBgn0034261	CG4966		dac	FBgn0005677	CG4952						CG14423	FBgn0029646	CG14423		beat-Ia	FBgn0013433	CG4846		CG5214	FBgn0037891	CG5214
dally	FBgn0263930	CG4974		dally	FBgn0263930	CG4974						nullo	FBgn0004143	CG14426		Cog1	FBgn0037998	CG4848		sdk	FBgn0021764	CG5227
PRL-1	FBgn0024734	CG4993		kek2	FBgn0015400	CG4977						bou	FBgn0261284	CG14430		CG4858	FBgn0037011	CG4858		Tasp1	FBgn0263602	CG5241
msps	FBgn0027948	CG5000		Mpcp2	FBgn0026409	CG4994						CG14431	FBgn0029922	CG14431		wg	FBgn0284084	CG4889		mRpL40	FBgn0037892	CG5242
ACOX1	FBgn0027572	CG5009		CG4998	FBgn0036612	CG4998						CG14435	FBgn0029911	CG14435		Tm1	FBgn0003721	CG4898		vib	FBgn0267975	CG5269
CLIP-190	FBgn0020503	CG5020		CG5003	FBgn0039554	CG5003						Coq7	FBgn0029502	CG14437		CG4962	FBgn0036597	CG4962		ClC-c	FBgn0036566	CG5284
BNIP3	FBgn0037007	CG5059		ACOX1	FBgn0027572	CG5009						CG14440	FBgn0029894	CG14440		CG4991	FBgn0030817	CG4991		Galk	FBgn0263199	CG5288
croc	FBgn0014143	CG5069		aft	FBgn0026309	CG5032						CG14441	FBgn0029895	CG14441		Mpcp2	FBgn0026409	CG4994		dpr5	FBgn0037908	CG5308
CG5087	FBgn0035953	CG5087		Tfb4	FBgn0031309	CG5041						CG14445	FBgn0029851	CG14445		CG5004	FBgn0260748	CG5004		nmdyn-D6	FBgn0030573	CG5310
Tor	FBgn0021796	CG5092		CG5043	FBgn0032636	CG5043						Ptx1	FBgn0020912	CG1447		CG5043	FBgn0032636	CG5043		CG5316	FBgn0038704	CG5316
Sgt	FBgn0032640	CG5094		CG5056	FBgn0032231	CG5056						poe	FBgn0011230	CG14472		CG5070	FBgn0030824	CG5070		CG5321	FBgn0030575	CG5321
CG5098	FBgn0034300	CG5098		BNIP3	FBgn0037007	CG5059						CG14478	FBgn0028953	CG14478		CG5071	FBgn0039347	CG5071		CG5334	FBgn0030577	CG5334
CG5104	FBgn0037009	CG5104		croc	FBgn0014143	CG5069						Inx3	FBgn0265274	CG1448		CG5089	FBgn0034144	CG5089		GluProRS	FBgn0005674	CG5394
Pcl	FBgn0003044	CG5109		Sgt	FBgn0032640	CG5094						CG14480	FBgn0034242	CG14480		Cyp312a1	FBgn0036778	CG5137		robo3	FBgn0041097	CG5423
CG5114	FBgn0036460	CG5114		CG5114	FBgn0036460	CG5114						olf186-M	FBgn0015522	CG14489		CG5144	FBgn0035957	CG5144		CG5447	FBgn0039427	CG5447
l(3)psg2	FBgn0035617	CG5146		CG5116	FBgn0039339	CG5116						zfh2	FBgn0004607	CG1449		CG5172	FBgn0030830	CG5172		Ntan1	FBgn0034371	CG5473
Rpc53	FBgn0036775	CG5147		MED28	FBgn0039337	CG5121						CG14500	FBgn0034318	CG14500		Tom	FBgn0026320	CG5185		Prestin	FBgn0036770	CG5485
CG5174	FBgn0034345	CG5174		Doc1	FBgn0028789	CG5133						Cyt-c1L	FBgn0039651	CG14508		loco	FBgn0020278	CG5248		Tl	FBgn0262473	CG5490
kuk	FBgn0038476	CG5175		l(3)psg2	FBgn0035617	CG5146						Apc	FBgn0015589	CG1451		CG5282	FBgn0036986	CG5282		CG5510	FBgn0039160	CG5510
Doc2	FBgn0035956	CG5187		Idgf5	FBgn0064237	CG5154						CG14511	FBgn0039641	CG14511		CG5321	FBgn0030575	CG5321		Ide	FBgn0001247	CG5517
CG5199	FBgn0036994	CG5199		CG5160	FBgn0031906	CG5160						Nepl18	FBgn0039611	CG14528		Pex19	FBgn0032407	CG5325		CG5522	FBgn0034158	CG5522
Dad	FBgn0020493	CG5201		CG5174	FBgn0034345	CG5174						Nepl17	FBgn0039609	CG14529		Sec6	FBgn0266671	CG5341		B-H1	FBgn0011758	CG5529
bon	FBgn0023097	CG5206		atk	FBgn0036995	CG5195						TwdlE	FBgn0031957	CG14534		apt	FBgn0015903	CG5393		CG5532	FBgn0034902	CG5532
Patr-1	FBgn0266053	CG5208		bon	FBgn0023097	CG5206						wdn	FBgn0005642	CG1454		trbl	FBgn0028978	CG5408		GlyT	FBgn0034911	CG5549
chm	FBgn0028387	CG5229		CG5214	FBgn0037891	CG5214						CG14551	FBgn0039408	CG14551		St1	FBgn0034887	CG5428		Ets98B	FBgn0005659	CG5583
mRpL40	FBgn0037892	CG5242		CG5217	FBgn0038694	CG5217						CG14564	FBgn0037131	CG14564		mino	FBgn0027579	CG5508		Tusp	FBgn0039530	CG5586
loco	FBgn0020278	CG5248		CG5225	FBgn0038468	CG5225						CG14565	FBgn0037129	CG14565		B-H1	FBgn0011758	CG5529		nAChRalpha1	FBgn0000036	CG5610
muc	FBgn0283658	CG5261		chm	FBgn0028387	CG5229						CG14566	FBgn0037127	CG14566		CG5532	FBgn0034902	CG5532		Rab3-GEF	FBgn0030613	CG5627
CG5270	FBgn0037897	CG5270		Tasp1	FBgn0263602	CG5241						CG14573	FBgn0037125	CG14573		Lpt	FBgn0263667	CG5591		wdb	FBgn0027492	CG5643
Ip259	FBgn0025366	CG5277		mRpL40	FBgn0037892	CG5242						CCHa2-R	FBgn0033058	CG14593		Sce	FBgn0003330	CG5595		yps	FBgn0022959	CG5654
AdipoR	FBgn0038984	CG5315		loco	FBgn0020278	CG5248						e(y)2b	FBgn0040670	CG14612		Grik	FBgn0038840	CG5621		Atpalpha	FBgn0002921	CG5670
CG5316	FBgn0038704	CG5316		NHP2	FBgn0029148	CG5258						CG14621	FBgn0031183	CG14621		nos	FBgn0002962	CG5637		CG5674	FBgn0032656	CG5674
Gdh	FBgn0001098	CG5320		ClC-c	FBgn0036566	CG5284						DAAM	FBgn0025641	CG14622		Prosalpha6T	FBgn0032492	CG5648		bsk	FBgn0000229	CG5680
Pex19	FBgn0032407	CG5325		Galk	FBgn0263199	CG5288						CG14626	FBgn0040360	CG14626		Spps	FBgn0039169	CG5669		ari-2	FBgn0025186	CG5709
Sec6	FBgn0266671	CG5341		CG5316	FBgn0038704	CG5316						CG14627	FBgn0040361	CG14627		Pop2	FBgn0036239	CG5684		CG5721	FBgn0034315	CG5721
CG5346	FBgn0038981	CG5346		Ced-12	FBgn0032409	CG5336						CG14629	FBgn0040398	CG14629		Calx	FBgn0013995	CG5685		fbl	FBgn0011205	CG5725
CG5355	FBgn0032242	CG5355		wkd	FBgn0037917	CG5344						CG14636	FBgn0037217	CG14636		yellow-g	FBgn0041709	CG5717		lolal	FBgn0022238	CG5738
Art4	FBgn0037770	CG5358		ThrRS	FBgn0027081	CG5353						ey	FBgn0005558	CG1464		Gld2	FBgn0038934	CG5732		Frq1	FBgn0030897	CG5744
mi	FBgn0261786	CG5360		CG5359	FBgn0037773	CG5359						TwdlV	FBgn0037227	CG14640		Nup75	FBgn0034310	CG5733		mfr	FBgn0266757	CG5747
Reck	FBgn0036463	CG5392		mi	FBgn0261786	CG5360						CG14650	FBgn0037252	CG14650		dve	FBgn0020307	CG5799		Hsf	FBgn0001222	CG5748
KrT95D	FBgn0020647	CG5405		ItgaPS5	FBgn0034880	CG5372						CG14655	FBgn0037275	CG14655		CG5800	FBgn0030855	CG5800		BomT3	FBgn0038930	CG5778
Taf4	FBgn0010280	CG5444		apt	FBgn0015903	CG5393						CG14657	FBgn0037282	CG14657		Fas3	FBgn0000636	CG5803		Mapmodulin	FBgn0034282	CG5784
CG5447	FBgn0039427	CG5447		GluProRS	FBgn0005674	CG5394						CG14658	FBgn0037283	CG14658		CycB3	FBgn0015625	CG5814		CaBP1	FBgn0025678	CG5809
H	FBgn0001169	CG5460		nmd	FBgn0005322	CG5395						Fer2LCH	FBgn0015221	CG1469		Prx3	FBgn0038519	CG5826		Prx3	FBgn0038519	CG5826
Ntan1	FBgn0034371	CG5473		KrT95D	FBgn0020647	CG5405						tomboy20	FBgn0037828	CG14690		Dref	FBgn0015664	CG5838		mib1	FBgn0263601	CG5841
robo2	FBgn0002543	CG5481		Sur-8	FBgn0038504	CG5407						PGRP-LB	FBgn0037906	CG14704		mib1	FBgn0263601	CG5841		AP-1sigma	FBgn0039132	CG5864
Lrrk	FBgn0038816	CG5483		Miro	FBgn0039140	CG5410						CG14710	FBgn0037920	CG14710		CG5866	FBgn0038508	CG5866		Desat1	FBgn0086687	CG5887
CG5498	FBgn0027565	CG5498		St1	FBgn0034887	CG5428						CG14712	FBgn0037924	CG14712		D	FBgn0000411	CG5893		Men-b	FBgn0029155	CG5889
BOD1	FBgn0039560	CG5514		Taf4	FBgn0010280	CG5444						CG14715	FBgn0037930	CG14715		Nep1	FBgn0029843	CG5905		CG5890	FBgn0039380	CG5890
Ide	FBgn0001247	CG5517		Usp47	FBgn0016756	CG5486						CG14721	FBgn0037942	CG14721		Cdc6	FBgn0035918	CG5971		Etl1	FBgn0032157	CG5899
B-H1	FBgn0011758	CG5529		B-H2	FBgn0004854	CG5488						CG14739	FBgn0037987	CG14739		upd2	FBgn0030904	CG5988		Dek	FBgn0026533	CG5935
Or98a	FBgn0039551	CG5540		CG5504	FBgn0002174	CG5504						Es2	FBgn0023506	CG1474		Ugt37A3	FBgn0038083	CG5999		CG5937	FBgn0029834	CG5937
Ote	FBgn0266420	CG5581		CG5510	FBgn0039160	CG5510						CG14756	FBgn0033275	CG14756		CG6034	FBgn0036750	CG6034		ND-39	FBgn0037001	CG6020
Ets98B	FBgn0005659	CG5583		jnj	FBgn0266282	CG5524						CG14762	FBgn0033250	CG14762		CG6052	FBgn0036747	CG6052		cdi	FBgn0004876	CG6027
CG5590	FBgn0039537	CG5590		CCT4	FBgn0032444	CG5525						Cp36	FBgn0000359	CG1478		mip120	FBgn0033846	CG6061		crim	FBgn0036198	CG6038
Sce	FBgn0003330	CG5595		Nep7	FBgn0039564	CG5527						CG14787	FBgn0027793	CG14787		Cyp28d2	FBgn0031688	CG6081		Bin1	FBgn0024491	CG6046
CG5614	FBgn0038359	CG5614		B-H1	FBgn0011758	CG5529						Rab27	FBgn0025382	CG14791		CG6118	FBgn0038339	CG6118		sra	FBgn0086370	CG6072
Vps35	FBgn0034708	CG5625		CG5532	FBgn0034902	CG5532						bnk	FBgn0004389	CG1480		eater	FBgn0243514	CG6124		Cyp28d2	FBgn0031688	CG6081
dsd	FBgn0039528	CG5634		CG5539	FBgn0034907	CG5539						Coa8	FBgn0029594	CG14806		CG6126	FBgn0038407	CG6126		Lrr47	FBgn0010398	CG6098
CG5639	FBgn0039527	CG5639		Ote	FBgn0266420	CG5581						Scgdelta	FBgn0025391	CG14808		Ser	FBgn0004197	CG6127		CrebB	FBgn0265784	CG6103
Utx	FBgn0260749	CG5640		Ets98B	FBgn0005659	CG5583						deltaCOP	FBgn0028969	CG14813		h-cup	FBgn0038334	CG6130		CG6106	FBgn0030914	CG6106
wdb	FBgn0027492	CG5643		CG5589	FBgn0036754	CG5589						CG14826	FBgn0035750	CG14826		Cpr97Ea	FBgn0039480	CG6131		CG6145	FBgn0033853	CG6145
Klp98A	FBgn0004387	CG5658		CG5590	FBgn0039537	CG5590						CG14830	FBgn0035755	CG14830		CG6145	FBgn0033853	CG6145		fwe	FBgn0261722	CG6151
ValRS-m	FBgn0035942	CG5660		CG5597	FBgn0034920	CG5597						fliI	FBgn0000709	CG1484		dah	FBgn0015926	CG6157		Cog2	FBgn0026634	CG6177
Sema5c	FBgn0284221	CG5661		nAChRalpha1	FBgn0000036	CG5610						CG14840	FBgn0038217	CG14840		vnd	FBgn0261930	CG6172		CG6184	FBgn0038725	CG6184
Atpalpha	FBgn0002921	CG5670		nos	FBgn0002962	CG5637						CG14853	FBgn0038246	CG14853		Gnmt	FBgn0038074	CG6188		mora	FBgn0029503	CG6198
Pten	FBgn0026379	CG5671		CG5644	FBgn0035948	CG5644						CG14857	FBgn0038262	CG14857		Cpr92A	FBgn0038714	CG6240		gammaSnap2	FBgn0266721	CG6208
CG5674	FBgn0032656	CG5674		CG5674	FBgn0032656	CG5674						CG1486	FBgn0031174	CG1486		unc-4	FBgn0024184	CG6269		tws	FBgn0004889	CG6235
Edem2	FBgn0032480	CG5682		Grip163	FBgn0026432	CG5688						krz	FBgn0040206	CG1487		CG6293	FBgn0037807	CG6293		unc-4	FBgn0024184	CG6269
Grip163	FBgn0026432	CG5688		RhoBTB	FBgn0036980	CG5701						CG14881	FBgn0038425	CG14881		Cpr50Cb	FBgn0033869	CG6305		CG6282	FBgn0035914	CG6282
ova	FBgn0032197	CG5694		mRF1	FBgn0032486	CG5705						CG14883	FBgn0038432	CG14883		CG6347	FBgn0033874	CG6347		OdsH	FBgn0026058	CG6352
jar	FBgn0011225	CG5695		beta-PheRS	FBgn0039175	CG5706						CG14891	FBgn0038445	CG14891		CG6356	FBgn0039178	CG6356		Aps	FBgn0036111	CG6391
mfr	FBgn0266757	CG5747		mfr	FBgn0266757	CG5747						CG14892	FBgn0038447	CG14892		Xpac	FBgn0004832	CG6358		CG6414	FBgn0029690	CG6414
CG5758	FBgn0032666	CG5758		stau	FBgn0003520	CG5753						Usp7	FBgn0030366	CG1490		S-Lap1	FBgn0035915	CG6372		amon	FBgn0023179	CG6438
CG5776	FBgn0032450	CG5776		Slc25A46b	FBgn0032664	CG5755						CG14903	FBgn0038446	CG14903		Wnt5	FBgn0010194	CG6407		Sema1b	FBgn0016059	CG6446
ppan	FBgn0010770	CG5786		Mapmodulin	FBgn0034282	CG5784						CG1492	FBgn0030361	CG1492		CG6421	FBgn0025827	CG6421		P32	FBgn0034259	CG6459
Usp8	FBgn0038862	CG5798		puf	FBgn0039214	CG5794						spz4	FBgn0032362	CG14928		qua	FBgn0003187	CG6433		plum	FBgn0039431	CG6490
dve	FBgn0020307	CG5799		meigo	FBgn0250820	CG5802						CycY	FBgn0032378	CG14939		Ggt-1	FBgn0030932	CG6461		CG6495	FBgn0027550	CG6495
Fas3	FBgn0000636	CG5803		CaBP1	FBgn0025678	CG5809						esc	FBgn0000588	CG14941		Jon65Aiii	FBgn0035665	CG6483		EDTP	FBgn0027506	CG6542
CaBP1	FBgn0025678	CG5809		CG5823	FBgn0038515	CG5823						ckd	FBgn0035427	CG14959		ND-24L	FBgn0036706	CG6485		glec	FBgn0015229	CG6575
chif	FBgn0000307	CG5813		Hem	FBgn0011771	CG5837						Asciz	FBgn0035407	CG14962		Pex7	FBgn0035922	CG6486		SelR	FBgn0267376	CG6584
Gp150	FBgn0013272	CG5820		mib1	FBgn0263601	CG5841						hob	FBgn0035420	CG14967		CG6497	FBgn0036704	CG6497		CG6607	FBgn0039204	CG6607
CG5823	FBgn0038515	CG5823		D	FBgn0000411	CG5893						CG14969	FBgn0035440	CG14969		Cp16	FBgn0000356	CG6533		Plekhm1	FBgn0034694	CG6613
Hem	FBgn0011771	CG5837		CG5903	FBgn0038400	CG5903						CG14971	FBgn0035449	CG14971		slou	FBgn0002941	CG6534		CG6650	FBgn0036402	CG6650
mib1	FBgn0263601	CG5841		CG5916	FBgn0038401	CG5916						CG14974	FBgn0040694	CG14974		TfIIFbeta	FBgn0010421	CG6538		CG6652	FBgn0036687	CG6652
cact	FBgn0000250	CG5848		mag	FBgn0036996	CG5932						CG14982	FBgn0035477	CG14982		lbe	FBgn0011278	CG6545		CASK	FBgn0013759	CG6703
AP-1sigma	FBgn0039132	CG5864		ND-39	FBgn0037001	CG6020						CG14985	FBgn0035482	CG14985		CG6553	FBgn0033880	CG6553		tsl	FBgn0003867	CG6705
heix	FBgn0028375	CG5876		CG6036	FBgn0039421	CG6036						Gad1	FBgn0004516	CG14994		phm	FBgn0004959	CG6578		gom	FBgn0029084	CG6727
CG5886	FBgn0039379	CG5886		crim	FBgn0036198	CG6038						Teh4	FBgn0035504	CG15003		CG6592	FBgn0035669	CG6592		Pex1	FBgn0013563	CG6760
arr	FBgn0000119	CG5912		barc	FBgn0037081	CG6049						Cpr64Aa	FBgn0035510	CG15006		H15	FBgn0016660	CG6604		Prps	FBgn0036030	CG6767
Idi	FBgn0038876	CG5919		CG6066	FBgn0039488	CG6066						ImpL2	FBgn0001257	CG15009		klg	FBgn0017590	CG6669		vers	FBgn0011335	CG6801
l(3)72Ab	FBgn0263599	CG5931		Cyp28d2	FBgn0031688	CG6081						unc	FBgn0003950	CG1501		NtR	FBgn0029147	CG6698		foi	FBgn0024236	CG6817
Cdc6	FBgn0035918	CG5971		CG6115	FBgn0040985	CG6115						dyl	FBgn0066365	CG15013		Taf2	FBgn0011836	CG6711		ergic53	FBgn0035909	CG6822
Hip14	FBgn0259824	CG6017		CG6118	FBgn0038339	CG6118						Cip4	FBgn0035533	CG15015		Nos	FBgn0011676	CG6713		ovo	FBgn0003028	CG6824
PolQ	FBgn0002905	CG6019		Root	FBgn0039152	CG6129						CG15021	FBgn0035544	CG15021		CG6723	FBgn0037895	CG6723		rhea	FBgn0260442	CG6831
ND-39	FBgn0037001	CG6020		Pep	FBgn0004401	CG6143						CG15046	FBgn0030927	CG15046		Ilp4	FBgn0044049	CG6736		ArfGAP3	FBgn0037182	CG6838
CG6026	FBgn0038676	CG6026		CG6145	FBgn0033853	CG6145						Mctp	FBgn0034389	CG15078		CenB1A	FBgn0039056	CG6742		nAChRalpha2	FBgn0000039	CG6844
cdi	FBgn0004876	CG6027		Cog2	FBgn0026634	CG6177						MFS15	FBgn0034392	CG15094		Pex1	FBgn0013563	CG6760		Tollo	FBgn0029114	CG6890
CG6040	FBgn0038679	CG6040		Ge-1	FBgn0283682	CG6181						CG15097	FBgn0034396	CG15097		CG6769	FBgn0030878	CG6769		Octbeta1R	FBgn0038980	CG6919
Bin1	FBgn0024491	CG6046		CG6195	FBgn0038723	CG6195						botv	FBgn0027535	CG15110		CG6793	FBgn0036242	CG6793		l(3)neo38	FBgn0265276	CG6930
barc	FBgn0037081	CG6049		mora	FBgn0029503	CG6198						ena	FBgn0000578	CG15112		vers	FBgn0011335	CG6801		CSN6	FBgn0028837	CG6932
CG6051	FBgn0039492	CG6051		Rfx	FBgn0020379	CG6312						CG15116	FBgn0034415	CG15116		Cyp18a1	FBgn0010383	CG6816		CG6959	FBgn0037956	CG6959
SMC1	FBgn0040283	CG6057		Orct	FBgn0019952	CG6331						CG15117	FBgn0034417	CG15117		ovo	FBgn0003028	CG6824		Gug	FBgn0010825	CG6964
Ald1	FBgn0000064	CG6058		CG6345	FBgn0037816	CG6345						CG15118	FBgn0034418	CG15118		tld	FBgn0003719	CG6868		VhaPPA1-1	FBgn0028662	CG7007
mip120	FBgn0033846	CG6061		Aps	FBgn0036111	CG6391						CG15120	FBgn0034454	CG15120		CG6873	FBgn0030951	CG6873		CG7011	FBgn0036489	CG7011
sra	FBgn0086370	CG6072		OXA1L	FBgn0027615	CG6404						Ir56c	FBgn0034457	CG15122		CG6893	FBgn0036807	CG6893		Manf	FBgn0027095	CG7013
Lrr47	FBgn0010398	CG6098		Hyccin	FBgn0034269	CG6406						CG15160	FBgn0032688	CG15160		CG6933	FBgn0036952	CG6933		DIP2	FBgn0024806	CG7020
CG6115	FBgn0040985	CG6115		Idh3b	FBgn0038922	CG6439						EMC5	FBgn0032732	CG15168		CG6938	FBgn0036235	CG6938		CG7029	FBgn0039026	CG7029
CG6118	FBgn0038339	CG6118		Cad74A	FBgn0036715	CG6445						na	FBgn0002917	CG1517		Kyat	FBgn0037955	CG6950		Sar1	FBgn0038947	CG7073
Ser	FBgn0004197	CG6127		Jon65Aiii	FBgn0035665	CG6483						sowi	FBgn0037460	CG15178		CG6967	FBgn0034187	CG6967		CG7091	FBgn0038099	CG7091
Cpr97Ea	FBgn0039480	CG6131		ND-24L	FBgn0036706	CG6485						CG15186	FBgn0037448	CG15186		gig	FBgn0005198	CG6975		CG7099	FBgn0032517	CG7099
Pep	FBgn0004401	CG6143		h	FBgn0001168	CG6494						Osi20	FBgn0037430	CG15188		CG7017	FBgn0036951	CG7017		Jon66Ci	FBgn0035886	CG7118
DCP2	FBgn0036534	CG6169		Stam	FBgn0027363	CG6521						WASp	FBgn0024273	CG1520		Ets65A	FBgn0005658	CG7018		l(3)05822	FBgn0010877	CG7129
Cog2	FBgn0026634	CG6177		Cp19	FBgn0000358	CG6524						CycK	FBgn0025674	CG15218		CG7173	FBgn0037099	CG7173		CRIF	FBgn0037102	CG7172
Reps	FBgn0032341	CG6192		Cp16	FBgn0000356	CG6533						CG15225	FBgn0034551	CG15225		CG7191	FBgn0031945	CG7191		Cpsf6	FBgn0035872	CG7185
Atg4b	FBgn0038325	CG6194		TfIIFbeta	FBgn0010421	CG6538						CG15269	FBgn0028878	CG15269		CG7201	FBgn0035865	CG7201		Arl5	FBgn0035866	CG7197
mora	FBgn0029503	CG6198		Art1	FBgn0037834	CG6554						CG1529	FBgn0031144	CG1529		CG7203	FBgn0031942	CG7203		cert	FBgn0027569	CG7207
Fmr1	FBgn0028734	CG6203		CG6567	FBgn0037842	CG6567						CG15293	FBgn0028526	CG15293		cert	FBgn0027569	CG7207		Cyp6a16	FBgn0031726	CG7249
MRP	FBgn0032456	CG6214		glec	FBgn0015229	CG6575						CG15322	FBgn0031088	CG15322		kel	FBgn0001301	CG7210		Toll-6	FBgn0036494	CG7250
CG6231	FBgn0038720	CG6231		CG6576	FBgn0035924	CG6576						karr	FBgn0040784	CG15323		CG7214	FBgn0031940	CG7214		CG7272	FBgn0036501	CG7272
tws	FBgn0004889	CG6235		Tpc1	FBgn0037852	CG6608						Ir7b	FBgn0029965	CG15326		tbrd-2	FBgn0034423	CG7229		Wdr62	FBgn0031374	CG7337
CG6254	FBgn0037794	CG6254		SIDL	FBgn0038303	CG6623						CG15333	FBgn0029989	CG15333		rib	FBgn0003254	CG7230		Tsr1	FBgn0037073	CG7338
ApepP	FBgn0026150	CG6291		CG6674	FBgn0036063	CG6674						cyr	FBgn0030001	CG15335		CG7298	FBgn0036948	CG7298		RFeSP	FBgn0021906	CG7361
CycT	FBgn0025455	CG6292		CG6695	FBgn0039215	CG6695						CG15356	FBgn0031377	CG15356		CG7322	FBgn0030968	CG7322		TM9SF4	FBgn0028541	CG7364
JIL-1	FBgn0020412	CG6297		GABA-B-R2	FBgn0027575	CG6706						Gr8a	FBgn0030108	CG15371		CG7329	FBgn0032271	CG7329		CG7368	FBgn0036179	CG7368
Rfx	FBgn0020379	CG6312		Osbp	FBgn0020626	CG6708						CG15373	FBgn0030889	CG15373		Sox21a	FBgn0036411	CG7345		CG7378	FBgn0030976	CG7378
Tsp97E	FBgn0039465	CG6323		Taf2	FBgn0011836	CG6711						Or22c	FBgn0026396	CG15377		Flacc	FBgn0030974	CG7358		Ir76b	FBgn0036937	CG7385
Ets97D	FBgn0004510	CG6338		Ubc2	FBgn0015320	CG6720						tmod	FBgn0082582	CG1539		RFeSP	FBgn0021906	CG7361		ERR	FBgn0035849	CG7404
CG6345	FBgn0037816	CG6345		gom	FBgn0029084	CG6727						Trf5	FBgn0031446	CG15398		CG7381	FBgn0038098	CG7381		CycH	FBgn0022936	CG7405
fab1	FBgn0028741	CG6355		CenB1A	FBgn0039056	CG6742						CG15403	FBgn0031504	CG15403		eg	FBgn0000560	CG7383		TyrR	FBgn0038542	CG7431
Uck	FBgn0263398	CG6364		Pex1	FBgn0013563	CG6760						tutl	FBgn0010473	CG15427		CG7402	FBgn0036768	CG7402		mub	FBgn0262737	CG7437
E2f1	FBgn0011766	CG6376		AsnRS-m	FBgn0034177	CG6796						Tbh	FBgn0010329	CG1543		ort	FBgn0003011	CG7411		tgy	FBgn0030984	CG7440
Aps	FBgn0036111	CG6391		vers	FBgn0011335	CG6801						Elp3	FBgn0031604	CG15433		tgy	FBgn0030984	CG7440		Or85a	FBgn0037576	CG7454
Hyccin	FBgn0034269	CG6406		foi	FBgn0024236	CG6817						MFS18	FBgn0025684	CG15438		Or85a	FBgn0037576	CG7454		Megf8	FBgn0031981	CG7466
Idh3b	FBgn0038922	CG6439		rhea	FBgn0260442	CG6831						ine	FBgn0011603	CG15444		CG7457	FBgn0035812	CG7457		P5CS	FBgn0037146	CG7470
Sema1b	FBgn0016059	CG6446		CG6841	FBgn0036828	CG6841						CG15456	FBgn0040650	CG15456		Ctr1B	FBgn0062412	CG7459		Oct-TyrR	FBgn0004514	CG7485
CG6454	FBgn0039187	CG6454		FucTA	FBgn0036485	CG6869						CG15461	FBgn0040649	CG15461		CG7460	FBgn0036749	CG7460		Con	FBgn0005775	CG7503
P32	FBgn0034259	CG6459		MED11	FBgn0036811	CG6884						CG15473	FBgn0029719	CG15473		CG7461	FBgn0034432	CG7461		CG7506	FBgn0035805	CG7506
ND-13B	FBgn0047038	CG6463		Cdc5	FBgn0265574	CG6905						CG15478	FBgn0029955	CG15478		CG7465	FBgn0035551	CG7465		ato	FBgn0010433	CG7508
plum	FBgn0039431	CG6490		CG6931	FBgn0036236	CG6931						CG15482	FBgn0032483	CG15482		Act79B	FBgn0000045	CG7478		anchor	FBgn0036741	CG7510
h	FBgn0001168	CG6494		CSN6	FBgn0028837	CG6932						CG15484	FBgn0032452	CG15484		CG7497	FBgn0036742	CG7497		Src64B	FBgn0262733	CG7524
Ns2	FBgn0034243	CG6501		mRpL45	FBgn0263863	CG6949						CG1552	FBgn0030258	CG1552		ato	FBgn0010433	CG7508		chrb	FBgn0036165	CG7533
E(z)	FBgn0000629	CG6502		CG6967	FBgn0034187	CG6967						Capa	FBgn0039722	CG15520		mtg	FBgn0260386	CG7549		CG7546	FBgn0035793	CG7546
Dlg5	FBgn0032363	CG6509		fwd	FBgn0004373	CG7004						CG15529	FBgn0039748	CG15529		CG7556	FBgn0030990	CG7556		CG7550	FBgn0035839	CG7550
CG6512	FBgn0036702	CG6512		CG7006	FBgn0039233	CG7006						hdc	FBgn0010113	CG15532		CG7565	FBgn0035833	CG7565		Rab3	FBgn0005586	CG7576
EDTP	FBgn0027506	CG6542		VhaPPA1-1	FBgn0028662	CG7007						CG15533	FBgn0039768	CG15533		CG7656	FBgn0036516	CG7656		UQCR-Q	FBgn0036728	CG7580
lbe	FBgn0011278	CG6545		CG7011	FBgn0036489	CG7011						CG15545	FBgn0039806	CG15545		Pxt	FBgn0261987	CG7660		CtBP	FBgn0020496	CG7583
CG6550	FBgn0034214	CG6550		Ets65A	FBgn0005658	CG7018						Sox100B	FBgn0024288	CG15552		Edg78E	FBgn0000551	CG7673		scyl	FBgn0041094	CG7590
Pp1alpha-96A	FBgn0003134	CG6593		DIP2	FBgn0024806	CG7020						CG15554	FBgn0039820	CG15554		Muc91C	FBgn0038642	CG7709		CG7601	FBgn0027583	CG7601
SCCRO4	FBgn0036967	CG6597		rno	FBgn0035106	CG7036						CG15577	FBgn0040904	CG15577		CG7714	FBgn0038645	CG7714		QIL1	FBgn0036726	CG7603
CG6607	FBgn0039204	CG6607		Rab3-GAP	FBgn0027505	CG7061						Upf1	FBgn0030354	CG1559		cato	FBgn0024249	CG7760		Meltrin	FBgn0265140	CG7649
ect	FBgn0000451	CG6611		CG7099	FBgn0032517	CG7099						Osi5	FBgn0037413	CG15590		sim	FBgn0004666	CG7771		crp	FBgn0001994	CG7664
Plekhm1	FBgn0034694	CG6613		spz3	FBgn0031959	CG7104						Osi9	FBgn0037416	CG15592		CG7786	FBgn0034096	CG7786		gl	FBgn0004618	CG7672
mid	FBgn0261963	CG6634		CG7115	FBgn0027515	CG7115						Ir25a	FBgn0031634	CG15627		z	FBgn0004050	CG7803		CG7692	FBgn0036714	CG7692
lsn	FBgn0260940	CG6637		Jon66Ci	FBgn0035886	CG7118						CG15628	FBgn0031632	CG15628		CG7839	FBgn0036124	CG7839		shn	FBgn0003396	CG7734
AGO1	FBgn0262739	CG6671		PolH	FBgn0037141	CG7143						CG15646	FBgn0030665	CG15646		sr	FBgn0003499	CG7847		CG7739	FBgn0036509	CG7739
CG6686	FBgn0032388	CG6686		Acp36DE	FBgn0011559	CG7157						CG15651	FBgn0034567	CG15651		CG7884	FBgn0031001	CG7884		promL	FBgn0026189	CG7740
CASK	FBgn0013759	CG6703		Cpr78E	FBgn0037114	CG7160						CG15657	FBgn0034595	CG15657		tin	FBgn0004110	CG7895		E(Pc)	FBgn0000581	CG7776
CG6712	FBgn0032408	CG6712		Jon66Cii	FBgn0035887	CG7170						Sara	FBgn0026369	CG15667		Acph-1	FBgn0000032	CG7899		CG7781	FBgn0032021	CG7781
RasGAP1	FBgn0004390	CG6721		Wnk	FBgn0037098	CG7177						MESK2	FBgn0043070	CG15669		bap	FBgn0004862	CG7902		CG7806	FBgn0032018	CG7806
CG6726	FBgn0039049	CG6726		JMJD4	FBgn0032671	CG7200						C901	FBgn0021742	CG1567		CG7907	FBgn0038887	CG7907		TfAP-2	FBgn0261953	CG7807
CG6729	FBgn0032296	CG6729		CG7201	FBgn0035865	CG7201						cv-2	FBgn0000395	CG15671		Fad2	FBgn0029172	CG7923		Ran-like	FBgn0036497	CG7815
Wdr81	FBgn0032395	CG6734		CG7203	FBgn0031942	CG7203						CG15674	FBgn0034642	CG15674		mus301	FBgn0002899	CG7972		Ostgamma	FBgn0032015	CG7830
vers	FBgn0011335	CG6801		cert	FBgn0027569	CG7207						RpS30	FBgn0038834	CG15697		RabX5	FBgn0035255	CG7980		l(3)L1231	FBgn0086686	CG7832
foi	FBgn0024236	CG6817		CG7214	FBgn0031940	CG7214						krimp	FBgn0034098	CG15707		MED24	FBgn0035851	CG7999		CG7884	FBgn0031001	CG7884
ergic53	FBgn0035909	CG6822		rib	FBgn0003254	CG7230						CG15708	FBgn0034099	CG15708		CG8010	FBgn0031008	CG8010		Arl8	FBgn0037551	CG7891
rhea	FBgn0260442	CG6831		Toll-6	FBgn0036494	CG7250						CG15710	FBgn0034120	CG15710		CG8028	FBgn0031010	CG8028		mAChR-B	FBgn0037546	CG7918
Rpb11	FBgn0032634	CG6840		GlyP	FBgn0004507	CG7254						CG15715	FBgn0036538	CG15715		CG8080	FBgn0033373	CG8080		tko	FBgn0003714	CG7925
CG6841	FBgn0036828	CG6841		Coq6	FBgn0031713	CG7277						CG15725	FBgn0030417	CG15725		CG8100	FBgn0036410	CG8100		CG7991	FBgn0035260	CG7991
CG6845	FBgn0035099	CG6845		CG7290	FBgn0036949	CG7290						Aven	FBgn0030410	CG15727		Eip75B	FBgn0000568	CG8127		CG8027	FBgn0033392	CG8027
Uggt	FBgn0014075	CG6850		CheA75a	FBgn0036783	CG7313						CG15740	FBgn0030340	CG15740		nom	FBgn0037617	CG8145		CG8034	FBgn0031011	CG8034
Mtch	FBgn0027786	CG6851		CG7339	FBgn0036188	CG7339						CG15747	FBgn0030474	CG15747		CG8170	FBgn0033365	CG8170		Eip75B	FBgn0000568	CG8127
tara	FBgn0040071	CG6889		RFeSP	FBgn0021906	CG7361						dmrt11E	FBgn0030477	CG15749		Mtk	FBgn0014865	CG8175		Arf51F	FBgn0013750	CG8156
l(3)neo38	FBgn0265276	CG6930		TM9SF4	FBgn0028541	CG7364						AgmNAT	FBgn0029813	CG15766		CG8192	FBgn0034030	CG8192		CG8172	FBgn0033362	CG8172
CSN6	FBgn0028837	CG6932		CG7367	FBgn0031976	CG7367						mRpL52	FBgn0033208	CG1577		PPO2	FBgn0033367	CG8193		Pgant1	FBgn0034025	CG8182
sstn	FBgn0036476	CG6945		CG7368	FBgn0036179	CG7368						CG15773	FBgn0029795	CG15773		RNaseX25	FBgn0010406	CG8194		RNaseX25	FBgn0010406	CG8194
Clc	FBgn0024814	CG6948		eg	FBgn0000560	CG7383						zip	FBgn0265434	CG15792		CG8204	FBgn0034033	CG8204		CG8202	FBgn0037622	CG8202
Nup133	FBgn0039004	CG6958		Ir76b	FBgn0036937	CG7385						Dhc62B	FBgn0013811	CG15804		Cep89	FBgn0266708	CG8214		CG8204	FBgn0034033	CG8204
CG6959	FBgn0037956	CG6959		CycH	FBgn0022936	CG7405						CG1582	FBgn0030246	CG1582		spab	FBgn0033358	CG8216		CG8219	FBgn0035693	CG8219
gish	FBgn0250823	CG6963		ort	FBgn0003011	CG7411						fon	FBgn0032773	CG15825		babo	FBgn0011300	CG8224		Poxn	FBgn0003130	CG8246
Gug	FBgn0010825	CG6964		Nopp140	FBgn0037137	CG7421						Apoltp	FBgn0032136	CG15828		Poxn	FBgn0003130	CG8246		tun	FBgn0034046	CG8253
CG6966	FBgn0038286	CG6966		TrpRS-m	FBgn0036763	CG7441						Eip63F-1	FBgn0004910	CG15855		exex	FBgn0041156	CG8254		Srp9	FBgn0035827	CG8268
CG6983	FBgn0035896	CG6983		Or85a	FBgn0037576	CG7454						Pka-R2	FBgn0022382	CG15862		bin3	FBgn0263144	CG8276		Sln	FBgn0033657	CG8271
VhaPPA1-1	FBgn0028662	CG7007		CG7492	FBgn0035807	CG7492						CG15865	FBgn0015336	CG15865		CG8299	FBgn0034052	CG8299		Pde6	FBgn0038237	CG8279
CG7011	FBgn0036489	CG7011		PGRP-SD	FBgn0035806	CG7496						CG15873	FBgn0035003	CG15873		Lst	FBgn0034140	CG8317		bdg	FBgn0034049	CG8291
Manf	FBgn0027095	CG7013		Setx	FBgn0035842	CG7504						Pgam5-2	FBgn0035004	CG15874		RpIII128	FBgn0004463	CG8344		CG8298	FBgn0033673	CG8298
Unr	FBgn0263352	CG7015		CG7506	FBgn0035805	CG7506						CG15877	FBgn0035337	CG15877		E(spl)m7-HLH	FBgn0002633	CG8361		CG8336	FBgn0036020	CG8336
CG7029	FBgn0039026	CG7029		CG7550	FBgn0035839	CG7550						CG15878	FBgn0035316	CG15878		Drep3	FBgn0028407	CG8364		Drep3	FBgn0028407	CG8364
rno	FBgn0035106	CG7036		CG7564	FBgn0036734	CG7564						CG15914	FBgn0030700	CG15914		VGAT	FBgn0033911	CG8394		ap	FBgn0267978	CG8376
Cbl	FBgn0020224	CG7037		CG7565	FBgn0035833	CG7565						resilin	FBgn0034157	CG15920		Jhe	FBgn0010052	CG8425		VGAT	FBgn0033911	CG8394
Rab3-GAP	FBgn0027505	CG7061		UQCR-Q	FBgn0036728	CG7580						CG1598	FBgn0033191	CG1598		wntD	FBgn0038134	CG8458		CG8405	FBgn0034071	CG8405
Rab19	FBgn0015793	CG7062		sll	FBgn0038524	CG7623						CG1602	FBgn0033186	CG1602		CG8478	FBgn0037746	CG8478		spin	FBgn0086676	CG8428
Sar1	FBgn0038947	CG7073		CG7634	FBgn0037101	CG7634						CG1603	FBgn0033185	CG1603		soti	FBgn0038225	CG8489		lbk	FBgn0034083	CG8434
CG7080	FBgn0038941	CG7080		Mps1	FBgn0000063	CG7643						az2	FBgn0025185	CG1605		ppk23	FBgn0030844	CG8527		GluRIA	FBgn0004619	CG8442
CG7115	FBgn0027515	CG7115		Meltrin	FBgn0265140	CG7649						Gcn2	FBgn0019990	CG1609		CG8560	FBgn0035781	CG8560		PGAP5	FBgn0031997	CG8455
l(3)05822	FBgn0010877	CG7129		tap	FBgn0015550	CG7659						Hmr	FBgn0001206	CG1619		CG8568	FBgn0030841	CG8568		Ankle2	FBgn0028343	CG8465
cdc14	FBgn0031952	CG7134		Pxt	FBgn0261987	CG7660						CG1620	FBgn0033183	CG1620		CG8586	FBgn0033320	CG8586		Cam	FBgn0000253	CG8472
PolH	FBgn0037141	CG7143		veli	FBgn0039269	CG7662						CG1628	FBgn0030218	CG1628		Toll-7	FBgn0034476	CG8595		CG8485	FBgn0033915	CG8485
Vps39	FBgn0038593	CG7146		Nup43	FBgn0038609	CG7671						CG1632	FBgn0030027	CG1632		CG8617	FBgn0033925	CG8617		lqf	FBgn0028582	CG8532
CG7156	FBgn0038588	CG7156		Edg78E	FBgn0000551	CG7673						Jafrac1	FBgn0040309	CG1633		dimm	FBgn0023091	CG8667		sd	FBgn0003345	CG8544
Mkrn1	FBgn0029152	CG7184		CG7675	FBgn0038610	CG7675						CG1637	FBgn0030245	CG1637		Cyp6a14	FBgn0033302	CG8687		Ih	FBgn0263397	CG8585
Cpsf6	FBgn0035872	CG7185		CG7692	FBgn0036714	CG7692						sisA	FBgn0003411	CG1641		Mal-A3	FBgn0002571	CG8695		Toll-7	FBgn0034476	CG8595
JMJD4	FBgn0032671	CG7200		CG7694	FBgn0038627	CG7694						Atg5	FBgn0029943	CG1643		CG8728	FBgn0033235	CG8728		CG8611	FBgn0027602	CG8611
cert	FBgn0027569	CG7207		shn	FBgn0003396	CG7734						CG1648	FBgn0033446	CG1648		beta3GalTII	FBgn0033315	CG8734		Acbp4	FBgn0035742	CG8629
Sirup	FBgn0031971	CG7224		Syx6	FBgn0037084	CG7736						unpg	FBgn0015561	CG1650		CG8736	FBgn0033308	CG8736		CG8635	FBgn0033317	CG8635
pes	FBgn0031969	CG7228		kug	FBgn0261574	CG7749						unc-119	FBgn0025549	CG1659		CG8738	FBgn0033321	CG8738		rgr	FBgn0267792	CG8643
CG7289	FBgn0031379	CG7289		ppl	FBgn0027945	CG7758						CG1663	FBgn0033449	CG1663		Oat	FBgn0022774	CG8782		Fim	FBgn0024238	CG8649
Rrp6	FBgn0038269	CG7292		pic	FBgn0260962	CG7769						CG16711	FBgn0036032	CG16711		PK2-R1	FBgn0038140	CG8784		CG8671	FBgn0032938	CG8671
Wdr62	FBgn0031374	CG7337		CG7791	FBgn0033038	CG7791						CG16721	FBgn0029820	CG16721		PK2-R2	FBgn0038139	CG8795		ND-13A	FBgn0031684	CG8680
RFeSP	FBgn0021906	CG7361		CG7841	FBgn0036502	CG7841						Git	FBgn0033539	CG16728		DUBAI	FBgn0033738	CG8830		mon2	FBgn0031985	CG8683
TM9SF4	FBgn0028541	CG7364		CG7882	FBgn0033047	CG7882						St2	FBgn0037665	CG16733		Thor	FBgn0261560	CG8846		Acsl	FBgn0263120	CG8732
Phs	FBgn0036522	CG7372		Arl8	FBgn0037551	CG7891						slp1	FBgn0003430	CG16738		CG8851	FBgn0031546	CG8851		CG8765	FBgn0036900	CG8765
CycH	FBgn0022936	CG7405		tin	FBgn0004110	CG7895						CG16739	FBgn0034505	CG16739		CG8854	FBgn0033702	CG8854		CG8768	FBgn0033769	CG8768
Tab2	FBgn0086358	CG7417		CG7920	FBgn0039737	CG7920						CG16749	FBgn0037678	CG16749		Jon25Bii	FBgn0031654	CG8869		tey	FBgn0036899	CG8780
CG7420	FBgn0031344	CG7420		Axn	FBgn0026597	CG7926						CG16753	FBgn0035393	CG16753		CG8907	FBgn0038466	CG8907		Rnf146	FBgn0036897	CG8786
mub	FBgn0262737	CG7437		MED17	FBgn0038578	CG7957						CG16756	FBgn0029765	CG16756		Psi	FBgn0014870	CG8912		wun	FBgn0016078	CG8804
AGO2	FBgn0087035	CG7439		tna	FBgn0026160	CG7958						Spn	FBgn0010905	CG16757		CkIIbeta2	FBgn0026136	CG8914		muskelin	FBgn0033757	CG8811
TrpRS-m	FBgn0036763	CG7441		Cds	FBgn0010350	CG7962						CG16758	FBgn0035348	CG16758		otk2	FBgn0267728	CG8964		RpS11	FBgn0033699	CG8857
hbs	FBgn0029082	CG7449		MED24	FBgn0035851	CG7999						CG1677	FBgn0029941	CG1677		Drip	FBgn0015872	CG9023		CG8861	FBgn0037676	CG8861
Syx17	FBgn0035540	CG7452		Rme-8	FBgn0015477	CG8014						lov	FBgn0266129	CG16778		CG9029	FBgn0031746	CG9029		CG9003	FBgn0033639	CG9003
Cog4	FBgn0032258	CG7456		CG8027	FBgn0033392	CG8027						fzr2	FBgn0034937	CG16783		Tsp47F	FBgn0033629	CG9033		en	FBgn0000577	CG9015
CG7457	FBgn0035812	CG7457		CG8060	FBgn0034113	CG8060						fz3	FBgn0027343	CG16785		Vm26Aa	FBgn0003979	CG9048		CG9018	FBgn0035318	CG9018
Megf8	FBgn0031981	CG7466		CG8086	FBgn0032010	CG8086						CG16786	FBgn0034974	CG16786		Cpr47Ea	FBgn0033597	CG9079		Fem-1	FBgn0034542	CG9025
CG7506	FBgn0035805	CG7506		Mi-2	FBgn0262519	CG8103						RnpS1	FBgn0037707	CG16788		RpL37a	FBgn0030616	CG9091		CG9040	FBgn0036394	CG9040
Dhc64C	FBgn0261797	CG7507		nom	FBgn0037617	CG8145						CG16789	FBgn0037712	CG16789		CG9095	FBgn0030617	CG9095		Lsd-2	FBgn0030608	CG9057
anchor	FBgn0036741	CG7510		CG8149	FBgn0037700	CG8149						CG16800	FBgn0032462	CG16800		CG9098	FBgn0031762	CG9098		Cyp4s3	FBgn0030615	CG9081
Src64B	FBgn0262733	CG7524		Pms2	FBgn0011660	CG8169						Hr51	FBgn0034012	CG16801		CG9101	FBgn0030622	CG9101		Ubr1	FBgn0030809	CG9086
Tie	FBgn0014073	CG7525		CG8172	FBgn0033362	CG8172						CG16815	FBgn0032491	CG16815		CG9109	FBgn0031765	CG9109		Tsp26A	FBgn0031760	CG9093
GluClalpha	FBgn0024963	CG7535		CG8180	FBgn0034021	CG8180						CG16826	FBgn0032505	CG16826		uif	FBgn0031879	CG9138		CG9095	FBgn0030617	CG9095
CG7546	FBgn0035793	CG7546		Pgant1	FBgn0034025	CG8182						TTLL4A	FBgn0026147	CG16833		acj6	FBgn0000028	CG9151		bab1	FBgn0004870	CG9097
CG7565	FBgn0035833	CG7565		RNaseX25	FBgn0010406	CG8194						Art8	FBgn0032329	CG16840		Ptp61F	FBgn0267487	CG9181		CG9101	FBgn0030622	CG9101
UQCR-Q	FBgn0036728	CG7580		par-1	FBgn0260934	CG8201						CG16854	FBgn0032338	CG16854		CG9192	FBgn0035193	CG9192		CG9107	FBgn0031764	CG9107
Bub3	FBgn0025457	CG7581		CG8204	FBgn0034033	CG8204						Vajk3	FBgn0028544	CG16884		Galt	FBgn0263200	CG9232		acj6	FBgn0000028	CG9151
CtBP	FBgn0020496	CG7583		tun	FBgn0034046	CG8253						Vajk2	FBgn0032538	CG16885		CAH15	FBgn0034560	CG9235		CG9164	FBgn0030634	CG9164
Obp99c	FBgn0039682	CG7584		exex	FBgn0041156	CG8254						lz	FBgn0002576	CG1689		Cib2	FBgn0034558	CG9236		312	FBgn0029514	CG9166
Sgs5bis	FBgn0038523	CG7587		CysRS-m	FBgn0033900	CG8257						CG16896	FBgn0035073	CG16896		CG9270	FBgn0032908	CG9270		CG9171	FBgn0031738	CG9171
QIL1	FBgn0036726	CG7603		Sln	FBgn0033657	CG8271						CG16903	FBgn0040394	CG16903		Glt	FBgn0001114	CG9280		Ptp61F	FBgn0267487	CG9181
sll	FBgn0038524	CG7623		Snx6	FBgn0032005	CG8282						Imp	FBgn0285926	CG1691		Cpr76Bc	FBgn0036880	CG9295		CG9205	FBgn0035181	CG9205
emei	FBgn0036133	CG7638		ADD1	FBgn0026573	CG8290						Eps-15	FBgn0035060	CG16932		CG9395	FBgn0032506	CG9395		sm	FBgn0003435	CG9218
CG7646	FBgn0036926	CG7646		bdg	FBgn0034049	CG8291						CG16935	FBgn0033883	CG16935		jing	FBgn0086655	CG9397		WDR79	FBgn0031782	CG9226
Meltrin	FBgn0265140	CG7649		CG8311	FBgn0034141	CG8311						Dis3l2	FBgn0035111	CG16940		sbm	FBgn0030574	CG9413		Cib2	FBgn0034558	CG9236
veli	FBgn0039269	CG7662		CG8312	FBgn0037720	CG8312						Rchy1	FBgn0031816	CG16947		Zip42C.1	FBgn0033096	CG9428		B4	FBgn0023407	CG9239
CG7692	FBgn0036714	CG7692		Lst	FBgn0034140	CG8317						Hsp60D	FBgn0032525	CG16954		Zip42C.2	FBgn0033097	CG9430		Nhe2	FBgn0040297	CG9256
CG7694	FBgn0038627	CG7694		E(spl)malpha-BFM	FBgn0002732	CG8337						Crys	FBgn0005664	CG16963		l(2)01289	FBgn0010482	CG9432		nrv1	FBgn0015776	CG9258
Taf5	FBgn0010356	CG7704		Dh44	FBgn0012344	CG8348						CG16972	FBgn0032481	CG16972		Fst	FBgn0037724	CG9434		nrv2	FBgn0015777	CG9261
RpL11	FBgn0013325	CG7726		CG8372	FBgn0032000	CG8372						Roc1a	FBgn0025638	CG16982		Cyp6a2	FBgn0000473	CG9438		CG9265	FBgn0032910	CG9265
CG7739	FBgn0036509	CG7739		VGAT	FBgn0033911	CG8394						SkpA	FBgn0025637	CG16983		MED6	FBgn0024330	CG9473		Hnf4	FBgn0004914	CG9310
promL	FBgn0026189	CG7740		CG8405	FBgn0034071	CG8405						CG16984	FBgn0062517	CG16984		CG9485	FBgn0034618	CG9485		Amacr	FBgn0032881	CG9319
CG7741	FBgn0033615	CG7741		Rep	FBgn0026378	CG8432						daw	FBgn0031461	CG16987		CG9492	FBgn0037726	CG9492		CG9328	FBgn0032886	CG9328
kug	FBgn0261574	CG7749		sotv	FBgn0029175	CG8433						Roc1b	FBgn0040291	CG16988		Tsp29Fa	FBgn0032074	CG9494		rump	FBgn0267790	CG9373
ppl	FBgn0027945	CG7758		CG8435	FBgn0034084	CG8435						Phae1	FBgn0263234	CG16996		Eo	FBgn0030597	CG9504		AcCoAS	FBgn0012034	CG9390
pic	FBgn0260962	CG7769		clu	FBgn0034087	CG8443						CG17019	FBgn0033783	CG17019		slam	FBgn0043854	CG9506		ms(3)76Cc	FBgn0036895	CG9392
strat	FBgn0032020	CG7787		TBC1D5	FBgn0038129	CG8449						Ref2	FBgn0032439	CG17031		CG9550	FBgn0031826	CG9550		CG9395	FBgn0032506	CG9395
CG7800	FBgn0037552	CG7800		topi	FBgn0037751	CG8484						klar	FBgn0001316	CG17046		eya	FBgn0000320	CG9554		jing	FBgn0086655	CG9397
Zip99C	FBgn0039714	CG7816		lqf	FBgn0028582	CG8532						Met	FBgn0002723	CG1705		Rcd-1r	FBgn0032089	CG9573		ktub	FBgn0015721	CG9398
l(3)L1231	FBgn0086686	CG7832		Afti	FBgn0038223	CG8538						Inx6	FBgn0027107	CG17063		Poxm	FBgn0003129	CG9610		CG9410	FBgn0033086	CG9410
beg	FBgn0036691	CG7842		ppk26	FBgn0035785	CG8546						mars	FBgn0033845	CG17064		pip	FBgn0003089	CG9614		PDZ-GEF	FBgn0265778	CG9491
Ars2	FBgn0033062	CG7843		PAPLA1	FBgn0031990	CG8552						CG17065	FBgn0031099	CG17065		CG9624	FBgn0038213	CG9624		rut	FBgn0003301	CG9533
l(2)k09848	FBgn0284246	CG7845		CG8560	FBgn0035781	CG8560						pnt	FBgn0003118	CG17077		CG9632	FBgn0038377	CG9632		aspr	FBgn0031089	CG9572
Tbce	FBgn0033055	CG7861		fra	FBgn0011592	CG8581						CG17078	FBgn0086855	CG17078		Task6	FBgn0038165	CG9637		CG9590	FBgn0038360	CG9590
Pngl	FBgn0033050	CG7865		Ih	FBgn0263397	CG8585						mthl9	FBgn0035131	CG17084		grn	FBgn0001138	CG9656		Pbp45	FBgn0038371	CG9597
tin	FBgn0004110	CG7895		Toll-7	FBgn0034476	CG8595						Hcf	FBgn0039904	CG1710		Cpr73D	FBgn0036680	CG9665		f-cup	FBgn0028487	CG9611
CG7896	FBgn0039728	CG7896		CG8613	FBgn0033924	CG8613						cwo	FBgn0259938	CG17100		CG9676	FBgn0030773	CG9676		CG9632	FBgn0038377	CG9632
CG7920	FBgn0039737	CG7920		Iswi	FBgn0011604	CG8625						CG17104	FBgn0040496	CG17104		eIF3e	FBgn0025582	CG9677		RhoGEF2	FBgn0023172	CG9635
Fancm	FBgn0038889	CG7922		Acbp4	FBgn0035742	CG8629						hth	FBgn0001235	CG17117		CG9691	FBgn0030160	CG9691		grn	FBgn0001138	CG9656
Axn	FBgn0026597	CG7926		CG8635	FBgn0033317	CG8635						CG17121	FBgn0039043	CG17121		hb	FBgn0001180	CG9786		toc	FBgn0015600	CG9660
msk	FBgn0026252	CG7935		Tsp39D	FBgn0032943	CG8666						CG17127	FBgn0032299	CG17127		CG9799	FBgn0038146	CG9799		kud	FBgn0036667	CG9669
stck	FBgn0020249	CG7954		CG8675	FBgn0030834	CG8675						CG17147	FBgn0260393	CG17147		CG9822	FBgn0034623	CG9822		Dab	FBgn0000414	CG9695
CG7956	FBgn0038890	CG7956		lig	FBgn0020279	CG8715						Su(var)3-3	FBgn0260397	CG17149		VGlut	FBgn0031424	CG9887		nudC	FBgn0021768	CG9710
tna	FBgn0026160	CG7958		Acsl	FBgn0263120	CG8732						ATbp	FBgn0039946	CG17172		CG9926	FBgn0038190	CG9926		TSG101	FBgn0036666	CG9712
Srrm234	FBgn0035253	CG7971		Cyp305a1	FBgn0036910	CG8733						Magt4b	FBgn0036447	CG17173		E5	FBgn0008646	CG9930		mRpL21	FBgn0036853	CG9730
Mdh2	FBgn0262559	CG7998		CG8736	FBgn0033308	CG8736						CG17199	FBgn0038775	CG17199		Ndc80	FBgn0030500	CG9938		fz2	FBgn0016797	CG9739
Rme-8	FBgn0015477	CG8014		CG8738	FBgn0033321	CG8738						KP78b	FBgn0026063	CG17216		Nadsyn	FBgn0030512	CG9940		CG9776	FBgn0027866	CG9776
CG8026	FBgn0033391	CG8026		CG8765	FBgn0036900	CG8765						pros	FBgn0004595	CG17228		spz5	FBgn0035379	CG9972		CG9799	FBgn0038146	CG9799
CG8027	FBgn0033392	CG8027		CG8768	FBgn0033769	CG8768						CG17230	FBgn0046225	CG17230		snu	FBgn0039594	CG9990		CG9801	FBgn0037623	CG9801
VhaAC45	FBgn0262515	CG8029		CG8777	FBgn0033376	CG8777						CG1724	FBgn0031164	CG1724		lncRNA:CR15061	FBgn0030911	CR15061		CG9822	FBgn0034623	CG9822
Btk29A	FBgn0003502	CG8049		tsu	FBgn0033378	CG8781						CG17242	FBgn0250841	CG17242		ric8b	FBgn0030117	CR15910		CG9849	FBgn0034803	CG9849
CG8064	FBgn0038597	CG8064		Oat	FBgn0022774	CG8782						nocte	FBgn0261710	CG17255		lncRNA:CR31044	FBgn0051044	CR31044		PIG-M	FBgn0034649	CG9865
CG8067	FBgn0033891	CG8067		CG8785	FBgn0033760	CG8785						Nek2	FBgn0029970	CG17256		tRNA:Lys-TTT-2-5	FBgn0011905	CR31197		CG9896	FBgn0034808	CG9896
RN-tre	FBgn0020620	CG8085		Rnf146	FBgn0036897	CG8786						Ccdc85	FBgn0031488	CG17265		lncRNA:bxd	FBgn0020556	CR31273		Arp2	FBgn0011742	CG9901
row	FBgn0033998	CG8092		muskelin	FBgn0033757	CG8811						Prosalpha4T1	FBgn0265606	CG17268		tRNA:Thr-AGT-1-3	FBgn0051497	CR31497		tRNA:Ser-GCT-2-2	FBgn0011971	CR31476
Picot	FBgn0024315	CG8098		lilli	FBgn0041111	CG8817						CG17271	FBgn0038829	CG17271		lncRNA:CR31781	FBgn0051781	CR31781		tRNA:Asn-GTT-1-10	FBgn0051583	CR31583
syd	FBgn0024187	CG8110		fdl	FBgn0045063	CG8824						AdSS	FBgn0027493	CG17273		CR31824	FBgn0051824	CR31824		snmRNA:641	FBgn0065088	CR33683
Eip75B	FBgn0000568	CG8127		DUBAI	FBgn0033738	CG8830						Bdbt	FBgn0038857	CG17282		tRNA:Leu-TAA-3-1	FBgn0028889	CR31831		mir-957	FBgn0262182	CR42889
CG8141	FBgn0038125	CG8141		CG8858	FBgn0033698	CG8858						Fbp1	FBgn0000639	CG17285		tRNA:Arg-TCT-3-1	FBgn0051946	CR31946		mir-932	FBgn0262205	CR42912
CG8149	FBgn0037700	CG8149		CG8861	FBgn0037676	CG8861						Wdr82	FBgn0032030	CG17293		tRNA:Gly-GCC-2-1	FBgn0011866	CR31980		mir-2501	FBgn0262442	CR43005
CG8155	FBgn0034009	CG8155		CkIIbeta2	FBgn0026136	CG8914						CG17294	FBgn0032032	CG17294		tRNA:Thr-AGT-3-1Psi	FBgn0052034	CR32034		mir-14	FBgn0262447	CR43013
CG8170	FBgn0033365	CG8170		CG8929	FBgn0034504	CG8929						SNF4Agamma	FBgn0264357	CG17299		lncRNA:roX1	FBgn0019661	CR32777		mir-990	FBgn0262307	CR43014
dup	FBgn0000996	CG8171		tef	FBgn0086350	CG8961						VhaSFD	FBgn0027779	CG17332		tRNA:Pro-CGG-3-1	FBgn0025118	CR32784		mir-2493	FBgn0262315	CR43022
CG8180	FBgn0034021	CG8180		PI31	FBgn0033669	CG8979						Lk6	FBgn0017581	CG17342		tRNA:Pro-CGG-1-1	FBgn0052826	CR32826		lncRNA:iab8	FBgn0264857	CR43261
Pgant1	FBgn0034025	CG8182		PolG1	FBgn0004406	CG8987						CG17343	FBgn0032751	CG17343		snmRNA:357	FBgn0065097	CR33659		CR43281	FBgn0262970	CR43281
Khc-73	FBgn0019968	CG8183		en	FBgn0000577	CG9015						drl	FBgn0015380	CG17348		snoRNA:Psi18S-176	FBgn0086659	CR33913		lncRNA:CR43459	FBgn0263413	CR43459
CG8192	FBgn0034030	CG8192		CG9018	FBgn0035318	CG9018						Culd	FBgn0035880	CG17352		lncRNA:CR33938	FBgn0063127	CR33938		mir-4973	FBgn0263533	CR43518
RNaseX25	FBgn0010406	CG8194		Rich	FBgn0028500	CG9063						prd1	FBgn0037949	CG17360		lncRNA:CR34047	FBgn0054047	CR34047		mir-4968	FBgn0263569	CR43554
par-1	FBgn0260934	CG8201		eIF4A	FBgn0001942	CG9075						Vha55	FBgn0005671	CG17369		CR34311	FBgn0085340	CR34311		snoRNA:Psi28S-2996	FBgn0082980	CR43565
CG8204	FBgn0034033	CG8204		Mpcp1	FBgn0034497	CG9090						CG1737	FBgn0030293	CG1737		snoRNA:Psi28S-2263	FBgn0082990	CR34568		snoRNA:Me18S-C419	FBgn0086533	CR43566
Rcd1	FBgn0033897	CG8233		bab1	FBgn0004870	CG9097						SppL	FBgn0039381	CG17370		lncRNA:CR40053	FBgn0058053	CR40053		lncRNA:CR43607	FBgn0263582	CR43607
tun	FBgn0034046	CG8253		CG9098	FBgn0031762	CG9098						CG17377	FBgn0031859	CG17377		lncRNA:CR42756	FBgn0261814	CR42756		lncRNA:CR43608	FBgn0263583	CR43608
Srp9	FBgn0035827	CG8268		CG9107	FBgn0031764	CG9107						Achl	FBgn0033936	CG17386		lncRNA:CR42836	FBgn0262025	CR42836		lncRNA:CR43617	FBgn0263595	CR43617
Mtor	FBgn0013756	CG8274		CG9109	FBgn0031765	CG9109						Ntf-2	FBgn0031145	CG1740		lncRNA:CR42850	FBgn0262097	CR42850		lncRNA:CR43846	FBgn0264428	CR43846
bin3	FBgn0263144	CG8276		CG9133	FBgn0035198	CG9133						Cfp1	FBgn0030121	CG17446		lncRNA:CR42859	FBgn0262106	CR42859		asRNA:CR43903	FBgn0264504	CR43903
Rab8	FBgn0262518	CG8287		Rabex-5	FBgn0262937	CG9139						CG17470	FBgn0032869	CG17470		mir-972	FBgn0262181	CR42888		asRNA:CR44052	FBgn0264844	CR44052
bdg	FBgn0034049	CG8291		312	FBgn0029514	CG9166						CG17475	FBgn0038481	CG17475		mir-13b-2	FBgn0262421	CR42972		lncRNA:CR44058	FBgn0264867	CR44058
CG8303	FBgn0034143	CG8303		Ptp61F	FBgn0267487	CG9181						Uba5	FBgn0030305	CG1749		mir-1013	FBgn0262444	CR43010		lncRNA:CR44206	FBgn0265104	CR44206
CG8311	FBgn0034141	CG8311		CG9205	FBgn0035181	CG9205						mib2	FBgn0086442	CG17492		mir-315	FBgn0262461	CR43036		lncRNA:CR44269	FBgn0265255	CR44269
CG8312	FBgn0037720	CG8312		sm	FBgn0003435	CG9218						mad2	FBgn0035640	CG17498		lncRNA:CR43252	FBgn0262897	CR43252		lncRNA:CR44447	FBgn0265640	CR44447
Nf1	FBgn0015269	CG8318		nrv2	FBgn0015777	CG9261						pds5	FBgn0260012	CG17509		lncRNA:iab8	FBgn0264857	CR43261		lncRNA:CR44786	FBgn0266021	CR44786
Ttc7	FBgn0021847	CG8325		Glt	FBgn0001114	CG9280						GstE10	FBgn0063499	CG17522		lncRNA:CR43298	FBgn0262990	CR43298		lncRNA:CR44810	FBgn0266045	CR44810
RpIII128	FBgn0004463	CG8344		Cpr76Bd	FBgn0036881	CG9299						gry	FBgn0286567	CG17569		asRNA:CR43299	FBgn0262991	CR43299		lncRNA:CR44864	FBgn0266158	CR44864
Tmem131	FBgn0034060	CG8370		CG9302	FBgn0032514	CG9302						CG17572	FBgn0032753	CG17572		CR43360	FBgn0263092	CR43360		lncRNA:CR44978	FBgn0266313	CR44978
ap	FBgn0267978	CG8376		CG9304	FBgn0034674	CG9304						Or49b	FBgn0028963	CG17584		lncRNA:CR43408	FBgn0263327	CR43408		asRNA:CR45124	FBgn0266617	CR45124
gro	FBgn0001139	CG8384		Rhau	FBgn0032883	CG9323						cad	FBgn0000251	CG1759		asRNA:CR43413	FBgn0263332	CR43413		lncRNA:CR45165	FBgn0266675	CR45165
Not3	FBgn0033029	CG8426		Pomp	FBgn0032884	CG9324						Usf	FBgn0029711	CG17592		lncRNA:CR43435	FBgn0263383	CR43435		lncRNA:CR45238	FBgn0266773	CR45238
spin	FBgn0086676	CG8428		Mgat4a	FBgn0036446	CG9384						CG17593	FBgn0031544	CG17593		lncRNA:CR43440	FBgn0263388	CR43440		lncRNA:CR45276	FBgn0266814	CR45276
Got1	FBgn0001124	CG8430		AcCoAS	FBgn0012034	CG9390						S6kII	FBgn0262866	CG17596		asRNA:CR43472	FBgn0263449	CR43472		lncRNA:CR45293	FBgn0266831	CR45293
sotv	FBgn0029175	CG8433		CG9395	FBgn0032506	CG9395						CG17598	FBgn0031194	CG17598		mir-3641	FBgn0263630	CR43520		lncRNA:CR45438	FBgn0266987	CR45438
lbk	FBgn0034083	CG8434		jing	FBgn0086655	CG9397						Cluap1	FBgn0031196	CG17599		mir-4944	FBgn0263547	CR43532		lncRNA:CR45580	FBgn0267140	CR45580
CG8435	FBgn0034084	CG8435		ktub	FBgn0015721	CG9398						Taf1	FBgn0010355	CG17603		mir-4981	FBgn0263572	CR43557		lncRNA:CR45589	FBgn0267149	CR45589
Lis-1	FBgn0015754	CG8440		FBXO11	FBgn0037760	CG9461						eIF6	FBgn0034915	CG17611		mir-4919	FBgn0263576	CR43561		lncRNA:CR45742	FBgn0267306	CR45742
ATP6AP2	FBgn0037671	CG8444		MED6	FBgn0024330	CG9473						Pglym87	FBgn0011270	CG17645		snoRNA:abba-a	FBgn0263473	CR43588		lncRNA:CR45749	FBgn0267313	CR45749
TBC1D5	FBgn0038129	CG8449		CG9498	FBgn0031801	CG9498						Eglp3	FBgn0034884	CG17662		scaRNA:PsiU1-6	FBgn0263477	CR43592		asRNA:CR45802	FBgn0267452	CR45802
Vps16A	FBgn0285911	CG8454		Nepl5	FBgn0031808	CG9507						Spt20	FBgn0036374	CG17689		lncRNA:CR43617	FBgn0263595	CR43617		asRNA:CR45832	FBgn0267482	CR45832
CG8460	FBgn0031996	CG8460		C1GalTA	FBgn0032078	CG9520						fz	FBgn0001085	CG17697		lncRNA:CR43648	FBgn0263657	CR43648		lncRNA:CR45962	FBgn0267624	CR45962
HtrA2	FBgn0038233	CG8464		frj	FBgn0031815	CG9526						CG17716	FBgn0000633	CG17716		lncRNA:CR43652	FBgn0263661	CR43652		lncRNA:CR46004	FBgn0267666	CR46004
Cam	FBgn0000253	CG8472		mmy	FBgn0259749	CG9535						dap	FBgn0010316	CG1772		CR43734	FBgn0263985	CR43734		lncRNA:CR46006	FBgn0267668	CR46006
lqf	FBgn0028582	CG8532		eya	FBgn0000320	CG9554						ZnT63C	FBgn0035432	CG17723		lncRNA:CR43870	FBgn0264462	CR43870		lncRNA:CR46078	FBgn0267747	CR46078
Afti	FBgn0038223	CG8538		Pbp45	FBgn0038371	CG9597						CG17746	FBgn0035425	CG17746		asRNA:CR43959	FBgn0264674	CR43959		lncRNA:CR46215	FBgn0267935	CR46215
CG8545	FBgn0033741	CG8545		f-cup	FBgn0028487	CG9611						Tomosyn	FBgn0030412	CG17762		lncRNA:CR43987	FBgn0264719	CR43987		lncRNA:CR46268	FBgn0278598	CR46268
Kap-alpha1	FBgn0024889	CG8548		tex	FBgn0037569	CG9615						CG17768	FBgn0032240	CG17768		lncRNA:CR44016	FBgn0264786	CR44016			FBgn0003328
PAPLA1	FBgn0031990	CG8552		CG9630	FBgn0037561	CG9630						CG17782	FBgn0039195	CG17782		lncRNA:CR44081	FBgn0264890	CR44081			FBgn0004364
Rac2	FBgn0014011	CG8556		CG9632	FBgn0038377	CG9632						CG17786	FBgn0039167	CG17786		lncRNA:CR44148	FBgn0264997	CR44148			FBgn0033359
unc-104	FBgn0267002	CG8566		Task6	FBgn0038165	CG9637						CG17802	FBgn0038549	CG17802		asRNA:CR44205	FBgn0265103	CR44205			FBgn0034496
fra	FBgn0011592	CG8581		grn	FBgn0001138	CG9656						CG17816	FBgn0037525	CG17816		asRNA:CR44207	FBgn0265105	CR44207			FBgn0037010
Ih	FBgn0263397	CG8585		toc	FBgn0015600	CG9660						Uba1	FBgn0023143	CG1782		lncRNA:CR44213	FBgn0265144	CR44213			FBgn0259234
CTCF	FBgn0035769	CG8591		Rh4	FBgn0003250	CG9668						CG17821	FBgn0034383	CG17821		asRNA:CR44228	FBgn0265159	CR44228			FBgn0259822
Toll-7	FBgn0034476	CG8595		CG9706	FBgn0036662	CG9706						Vsp37A	FBgn0016038	CG17828		lncRNA:CR44236	FBgn0265167	CR44236			FBgn0262511
Cdc27	FBgn0012058	CG8610		TSG101	FBgn0036666	CG9712						CG17829	FBgn0025635	CG17829		lncRNA:CR44307	FBgn0265366	CR44307
CG8613	FBgn0033924	CG8613		CG9717	FBgn0039789	CG9717						Slip1	FBgn0024728	CG1783		lncRNA:CR44309	FBgn0265368	CR44309
CG8635	FBgn0033317	CG8635		CG9743	FBgn0039756	CG9743						inv	FBgn0001269	CG17835		lncRNA:CR44338	FBgn0265426	CR44338
trx	FBgn0003862	CG8651		pum	FBgn0003165	CG9755						Syp	FBgn0038826	CG17838		lncRNA:CR44344	FBgn0265444	CR44344
ND-13A	FBgn0031684	CG8680		hkb	FBgn0261434	CG9768						CG1785	FBgn0030061	CG1785		lncRNA:CR44348	FBgn0265448	CR44348
mon2	FBgn0031985	CG8683		hb	FBgn0001180	CG9786						Or10a	FBgn0030298	CG17867		lncRNA:CR44349	FBgn0265449	CR44349
Cul4	FBgn0033260	CG8711		CG9799	FBgn0038146	CG9799						Hexo2	FBgn0041629	CG1787		lncRNA:CR44387	FBgn0265537	CR44387
drosha	FBgn0026722	CG8730		CG9815	FBgn0034861	CG9815						14-3-3zeta	FBgn0004907	CG17870		lncRNA:CR44398	FBgn0265548	CR44398
CG8768	FBgn0033769	CG8768		CG9853	FBgn0086605	CG9853						CG17883	FBgn0040005	CG17883		lncRNA:CR44413	FBgn0265586	CR44413
Nup188	FBgn0033766	CG8771		RpL22-like	FBgn0034837	CG9871						Pdp1	FBgn0016694	CG17888		lncRNA:CR44420	FBgn0265593	CR44420
nemy	FBgn0261673	CG8776		dpp	FBgn0000490	CG9885						ChLD3	FBgn0032598	CG17905		lncRNA:CR44447	FBgn0265640	CR44447
CG8777	FBgn0033376	CG8777		VGlut	FBgn0031424	CG9887						Mmp2	FBgn0033438	CG1794		lncRNA:CR44451	FBgn0265644	CR44451
CG8778	FBgn0033761	CG8778		CG9897	FBgn0034807	CG9897						comm	FBgn0010105	CG17943		lncRNA:CR44461	FBgn0265654	CR44461
tey	FBgn0036899	CG8780		CG9926	FBgn0038190	CG9926						HmgD	FBgn0004362	CG17950		lncRNA:CR44487	FBgn0265680	CR44487
Rnf146	FBgn0036897	CG8786		Ube4B	FBgn0032467	CG9934						Sry-delta	FBgn0003512	CG17958		lncRNA:CR44495	FBgn0265688	CR44495
wnd	FBgn0036896	CG8789		fest	FBgn0034435	CG9975						CG17982	FBgn0030006	CG17982		lncRNA:CR44503	FBgn0265696	CR44503
l(3)76BDm	FBgn0260655	CG8793		snu	FBgn0039594	CG9990						CG17994	FBgn0033072	CG17994		lncRNA:CR44517	FBgn0265710	CR44517
Lon	FBgn0036892	CG8798		htt	FBgn0027655	CG9995						CG17999	FBgn0034552	CG17999		lncRNA:CR44538	FBgn0265731	CR44538
lilli	FBgn0041111	CG8817		CG9997	FBgn0039597	CG9997						CG18011	FBgn0033491	CG18011		lncRNA:CR44552	FBgn0265745	CR44552
fdl	FBgn0045063	CG8824		TwdlU	FBgn0037223	CR14638						Eip78C	FBgn0004865	CG18023		lncRNA:CR44568	FBgn0265761	CR44568
CG8854	FBgn0033702	CG8854		tRNA:iMet-CAT-1-1	FBgn0050452	CR30452						SoxN	FBgn0029123	CG18024		lncRNA:CR44579	FBgn0265790	CR44579
CG8858	FBgn0033698	CG8858		lncRNA:bxd	FBgn0020556	CR31273						kek6	FBgn0039862	CG1804		lncRNA:CR44586	FBgn0265797	CR44586
Rgl	FBgn0026376	CG8865		tRNA:Thr-AGT-1-3	FBgn0051497	CR31497						shi	FBgn0003392	CG18102		lncRNA:CR44630	FBgn0265841	CR44630
Aduk	FBgn0037679	CG8866		CR31822	FBgn0051822	CR31822						ETH	FBgn0028738	CG18105		lncRNA:CR44670	FBgn0265881	CR44670
ash1	FBgn0005386	CG8887		tRNA:Arg-TCT-3-1	FBgn0051946	CR31946						CG1812	FBgn0031119	CG1812		lncRNA:CR44674	FBgn0265885	CR44674
CG8950	FBgn0034186	CG8950		tRNA:CR32123:Psi	FBgn0052123	CR32123						CG1814	FBgn0033426	CG1814		asRNA:CR44704	FBgn0265915	CR44704
rau	FBgn0031745	CG8965		tRNA:Pro-CGG-2-2	FBgn0052173	CR32173						NimC2	FBgn0028939	CG18146		lncRNA:CR44735	FBgn0265948	CR44735
Roc2	FBgn0044020	CG8998		tRNA:Cys-GCA-1-4	FBgn0052286	CR32286						CG1815	FBgn0039863	CG1815		lncRNA:CR44736	FBgn0265949	CR44736
CG9003	FBgn0033639	CG9003		CR33294	FBgn0053294	CR33294						CG18171	FBgn0035262	CG18171		lncRNA:CR44745	FBgn0265958	CR44745
CG9005	FBgn0033638	CG9005		snoRNA:Psi18S-1347c	FBgn0086600	CR33633						Naa60	FBgn0036039	CG18177		lncRNA:CR44761	FBgn0265982	CR44761
en	FBgn0000577	CG9015		snoRNA:Psi28S-1180	FBgn0086658	CR33661						Octalpha2R	FBgn0038653	CG18208		lncRNA:CR44767	FBgn0265992	CR44767
Fem-1	FBgn0034542	CG9025		snRNA:U11	FBgn0083987	CR34151						alt	FBgn0038535	CG18212		lncRNA:CR44770	FBgn0265995	CR44770
CG9044	FBgn0031752	CG9044		Ir60c	FBgn0259186	CR42290						CG1824	FBgn0030403	CG1824		lncRNA:CR44786	FBgn0266021	CR44786
lid	FBgn0031759	CG9088		mir-219	FBgn0262376	CR42897						CG18265	FBgn0036725	CG18265		lncRNA:CR44788	FBgn0266023	CR44788
CG9107	FBgn0031764	CG9107		mir-1016	FBgn0262427	CR42981						CG18266	FBgn0031724	CG18266		lncRNA:CR44795	FBgn0266030	CR44795
uif	FBgn0031879	CG9138		mir-2493	FBgn0262315	CR43022						CG18273	FBgn0029525	CG18273		lncRNA:CR44801	FBgn0266036	CR44801
Kr-h2	FBgn0266449	CG9159		mir-34	FBgn0262459	CR43033						dre4	FBgn0002183	CG1828		asRNA:CR44818	FBgn0266065	CR44818
312	FBgn0029514	CG9166		mir-2281	FBgn0262327	CR43034						igl	FBgn0013467	CG18285		lncRNA:CR44822	FBgn0266069	CR44822
CG9171	FBgn0031738	CG9171		lncRNA:CR43239	FBgn0265270	CR43239						PhKgamma	FBgn0011754	CG1830		lncRNA:CR44827	FBgn0266074	CR44827
Ptp61F	FBgn0267487	CG9181		lncRNA:CR43252	FBgn0262897	CR43252						Rim2	FBgn0031359	CG18317		lncRNA:CR44888	FBgn0266182	CR44888
DCTN1-p150	FBgn0001108	CG9206		CR43360	FBgn0263092	CR43360						Clamp	FBgn0032979	CG1832		lncRNA:CR44901	FBgn0266206	CR44901
sm	FBgn0003435	CG9218		lncRNA:CR43412	FBgn0263331	CR43412						CG18343	FBgn0033683	CG18343		CR44906	FBgn0266211	CR44906
CAH15	FBgn0034560	CG9235		lncRNA:CR43419	FBgn0263338	CR43419						Rad23	FBgn0026777	CG1836		lncRNA:CR44923	FBgn0266228	CR44923
del	FBgn0086251	CG9252		lncRNA:CR43440	FBgn0263388	CR43440						Dic4	FBgn0036808	CG18363		lncRNA:CR44931	FBgn0266236	CR44931
Hacd2	FBgn0032524	CG9267		lncRNA:CR43451	FBgn0263405	CR43451						prtp	FBgn0030329	CG1837		lncRNA:CR44955	FBgn0266260	CR44955
CG9304	FBgn0034674	CG9304		lncRNA:CR43452	FBgn0263406	CR43452						ASPP	FBgn0034606	CG18375		lncRNA:CR44970	FBgn0266305	CR44970
Amacr	FBgn0032881	CG9319		mir-4918	FBgn0263550	CR43535						Eip93F	FBgn0264490	CG18389		asRNA:CR45015	FBgn0266371	CR45015
Rhau	FBgn0032883	CG9323		mir-4952	FBgn0263554	CR43539						Tango6	FBgn0032728	CG18398		asRNA:CR45041	FBgn0266401	CR45041
Pomp	FBgn0032884	CG9324		mir-4980	FBgn0263558	CR43543						CAP	FBgn0033504	CG18408		lncRNA:CR45055	FBgn0266415	CR45055
vari	FBgn0250785	CG9326		scaRNA:MeU2-C41	FBgn0261453	CR43570						Tango10	FBgn0030330	CG1841		lncRNA:CR45109	FBgn0266578	CR45109
CG9330	FBgn0036888	CG9330		lncRNA:CR43639	FBgn0263648	CR43639						Ude	FBgn0039226	CG18410		lncRNA:CR45115	FBgn0266590	CR45115
twit	FBgn0032895	CG9335		lncRNA:CR43718	FBgn0263871	CR43718						ph-p	FBgn0004861	CG18412		lncRNA:CR45125	FBgn0266618	CR45125
sky	FBgn0032901	CG9339		lncRNA:CR43810	FBgn0264358	CR43810						CG18428	FBgn0039149	CG18428		asRNA:CR45129	FBgn0266622	CR45129
RpL34b	FBgn0037686	CG9354		asRNA:CR43865	FBgn0264447	CR43865						oys	FBgn0033476	CG18445		lncRNA:CR45147	FBgn0266640	CR45147
mura	FBgn0037705	CG9381		asRNA:CR43891	FBgn0264483	CR43891						Br140	FBgn0033155	CG1845		lncRNA:CR45148	FBgn0266641	CR45148
jing	FBgn0086655	CG9397		asRNA:CR43903	FBgn0264504	CR43903						Optix	FBgn0025360	CG18455		lncRNA:CR45193	FBgn0266703	CR45193
bocks	FBgn0037719	CG9424		lncRNA:CR43940	FBgn0264568	CR43940						CG18476	FBgn0037931	CG18476		asRNA:CR45202	FBgn0266729	CR45202
coro	FBgn0265935	CG9446		lncRNA:CR43987	FBgn0264719	CR43987						LIMK1	FBgn0283712	CG1848		lncRNA:CR45203	FBgn0266730	CR45203
FBXO11	FBgn0037760	CG9461		lncRNA:CR43994	FBgn0264726	CR43994						run	FBgn0003300	CG1849		lncRNA:CR45220	FBgn0266747	CR45220
hyd	FBgn0002431	CG9484		lncRNA:CR44091	FBgn0264900	CR44091						Tak1	FBgn0026323	CG18492		lncRNA:CR45229	FBgn0266764	CR45229
PDZ-GEF	FBgn0265778	CG9491		asRNA:CR44207	FBgn0265105	CR44207						CG18507	FBgn0028527	CG18507		lncRNA:CR45234	FBgn0266769	CR45234
CG9582	FBgn0032090	CG9582		lncRNA:CR44232	FBgn0265163	CR44232						Adk3	FBgn0026602	CG1851		lncRNA:CR45248	FBgn0266783	CR45248
CG9590	FBgn0038360	CG9590		asRNA:CR44287	FBgn0265314	CR44287						AOX1	FBgn0267408	CG18522		lncRNA:CR45266	FBgn0266804	CR45266
omd	FBgn0038168	CG9591		lncRNA:CR44326	FBgn0265414	CR44326						CG18540	FBgn0034326	CG18540		lncRNA:CR45267	FBgn0266805	CR45267
Pbp45	FBgn0038371	CG9597		lncRNA:CR44338	FBgn0265426	CR44338						CG18547	FBgn0037973	CG18547		lncRNA:CR45278	FBgn0266816	CR45278
COX7A	FBgn0040529	CG9603		lncRNA:CR44419	FBgn0265592	CR44419						yellow-f	FBgn0041710	CG18550		lncRNA:CR45308	FBgn0266846	CR45308
Poxm	FBgn0003129	CG9610		lncRNA:CR44607	FBgn0265818	CR44607						nec	FBgn0002930	CG1857		lncRNA:CR45309	FBgn0266847	CR45309
f-cup	FBgn0028487	CG9611		lncRNA:CR44650	FBgn0265861	CR44650						r	FBgn0003189	CG18572		lncRNA:CR45316	FBgn0266855	CR45316
Nrt	FBgn0004108	CG9704		lncRNA:CR44660	FBgn0265871	CR44660						mbt	FBgn0025743	CG18582		lncRNA:CR45318	FBgn0266857	CR45318
CG9706	FBgn0036662	CG9706		lncRNA:CR44827	FBgn0266074	CR44827						viaf	FBgn0036237	CG18593		lncRNA:CR45319	FBgn0266858	CR45319
nudC	FBgn0021768	CG9710		lncRNA:CR44856	FBgn0266150	CR44856						CG18599	FBgn0038592	CG18599		lncRNA:CR45334	FBgn0266873	CR45334
TSG101	FBgn0036666	CG9712		asRNA:CR44873	FBgn0266167	CR44873						CG18605	FBgn0034411	CG18605		lncRNA:CR45336	FBgn0266875	CR45336
fz2	FBgn0016797	CG9739		lncRNA:CR44898	FBgn0266203	CR44898						Vha100-2	FBgn0028670	CG18617		lncRNA:CR45344	FBgn0266883	CR45344
Vps15	FBgn0260935	CG9746		lncRNA:CR44949	FBgn0266254	CR44949						Bem46	FBgn0025109	CG18642		lncRNA:CR45356	FBgn0266896	CR45356
pum	FBgn0003165	CG9755		lncRNA:CR44952	FBgn0266257	CR44952						Dtd	FBgn0037898	CG18643		lncRNA:CR45357	FBgn0266897	CR45357
hb	FBgn0001180	CG9786		asRNA:CR45053	FBgn0266413	CR45053						bin	FBgn0045759	CG18647		lncRNA:CR45360	FBgn0266900	CR45360
Suv3	FBgn0037232	CG9791		asRNA:CR45129	FBgn0266622	CR45129						Spn43Ab	FBgn0024293	CG1865		lncRNA:CR45379	FBgn0266928	CR45379
yellow-e	FBgn0041711	CG9792		asRNA:CR45195	FBgn0266705	CR45195						NetA	FBgn0015773	CG18657		lncRNA:CR45409	FBgn0266958	CR45409
GILT1	FBgn0038149	CG9796		lncRNA:CR45237	FBgn0266772	CR45237						Nckx30C	FBgn0028704	CG18660		lncRNA:CR45424	FBgn0266973	CR45424
CG9801	FBgn0037623	CG9801		lncRNA:CR45288	FBgn0266826	CR45288						Smyd4-1	FBgn0033427	CG1868		lncRNA:CR45452	FBgn0267008	CR45452
CG9815	FBgn0034861	CG9815		lncRNA:CR45310	FBgn0266849	CR45310						Cht7	FBgn0035398	CG1869		lncRNA:CR45507	FBgn0267063	CR45507
poly	FBgn0086371	CG9829		asRNA:CR45342	FBgn0266881	CR45342						eEF1alpha2	FBgn0000557	CG1873		asRNA:CR45525	FBgn0267081	CR45525
EndoB	FBgn0034433	CG9834		lncRNA:CR45353	FBgn0266893	CR45353						mor	FBgn0002783	CG18740		lncRNA:CR45534	FBgn0267090	CR45534
sona	FBgn0034903	CG9850		lncRNA:CR45379	FBgn0266928	CR45379						Dop1R2	FBgn0266137	CG18741		lncRNA:CR45537	FBgn0267097	CR45537
PTP-ER	FBgn0016641	CG9856		lncRNA:CR45406	FBgn0266955	CR45406						CG18809	FBgn0042132	CG18809		lncRNA:CR45547	FBgn0267107	CR45547
oaf	FBgn0011818	CG9884		lncRNA:CR45433	FBgn0266982	CR45433						Gdap2	FBgn0042135	CG18812		lncRNA:CR45564	FBgn0267124	CR45564
CG9896	FBgn0034808	CG9896		lncRNA:CR45436	FBgn0266985	CR45436						CG1889	FBgn0030164	CG1889		lncRNA:CR45571	FBgn0267131	CR45571
Art9	FBgn0038188	CG9929		lncRNA:CR45444	FBgn0266993	CR45444						CG1890	FBgn0039869	CG1890		lncRNA:CR45578	FBgn0267138	CR45578
E5	FBgn0008646	CG9930		lncRNA:CR45463	FBgn0267019	CR45463						Dr	FBgn0000492	CG1897		lncRNA:CR45579	FBgn0267139	CR45579
RtcB	FBgn0032781	CG9987		lncRNA:CR45561	FBgn0267121	CR45561						Cpr62Bc	FBgn0035281	CG1919		lncRNA:CR45586	FBgn0267146	CR45586
htt	FBgn0027655	CG9995		lncRNA:CR45562	FBgn0267122	CR45562						PolZ1	FBgn0002891	CG1925		lncRNA:CR45599	FBgn0267159	CR45599
hpRNA:CR18854	FBgn0285991	CR18854		lncRNA:CR45598	FBgn0267158	CR45598						CG1927	FBgn0027547	CG1927		lncRNA:CR45719	FBgn0267283	CR45719
tRNA:Asn-GTT-1-10	FBgn0051583	CR31583		lncRNA:CR45673	FBgn0267233	CR45673						ImpE2	FBgn0001254	CG1934		lncRNA:CR45737	FBgn0267301	CR45737
lncRNA:CR32111	FBgn0052111	CR32111		lncRNA:CR45732	FBgn0267296	CR45732						Dlic	FBgn0030276	CG1938		lncRNA:CR45788	FBgn0267438	CR45788
snRNA:U4:38AB	FBgn0003931	CR32879		lncRNA:CR45745	FBgn0267309	CR45745						Dpck	FBgn0037469	CG1939		asRNA:CR45798	FBgn0267448	CR45798
snoRNA:U3:54Ab	FBgn0065047	CR33628		lncRNA:CR45754	FBgn0267318	CR45754						CG1943	FBgn0037468	CG1943		lncRNA:CR45821	FBgn0267471	CR45821
snoRNA:Me18S-C1831	FBgn0065053	CR33674		lncRNA:CR45755	FBgn0267319	CR45755						faf	FBgn0005632	CG1945		lncRNA:CR45877	FBgn0267537	CR45877
snmRNA:641	FBgn0065088	CR33683		asRNA:CR45789	FBgn0267439	CR45789						CG1951	FBgn0039623	CG1951		asRNA:CR45890	FBgn0267550	CR45890
lncRNA:CR34047	FBgn0054047	CR34047		lncRNA:CR45823	FBgn0267473	CR45823						Pkc98E	FBgn0003093	CG1954		asRNA:CR45909	FBgn0267569	CR45909
snoRNA:Me28S-A2589a	FBgn0086023	CR34652		lncRNA:CR45884	FBgn0267544	CR45884						Cen	FBgn0032876	CG1962		lncRNA:CR45911	FBgn0267571	CR45911
snoRNA:Me28S-A774b	FBgn0086078	CR34707		lncRNA:CR45898	FBgn0267558	CR45898						CG1965	FBgn0037466	CG1965		asRNA:CR45924	FBgn0267586	CR45924
lncRNA:CR42859	FBgn0262106	CR42859		lncRNA:CR45900	FBgn0267560	CR45900						Acf	FBgn0027620	CG1966		lncRNA:CR45963	FBgn0267625	CR45963
mir-282	FBgn0262368	CR42880		asRNA:CR45924	FBgn0267586	CR45924						Cog6	FBgn0033401	CG1968		lncRNA:CR45983	FBgn0267645	CR45983
mir-9a	FBgn0262373	CR42891		lncRNA:CR45958	FBgn0267620	CR45958						ND-49	FBgn0039909	CG1970		lncRNA:CR46052	FBgn0267719	CR46052
mir-8	FBgn0262432	CR42988		lncRNA:CR45962	FBgn0267624	CR45962						yata	FBgn0260990	CG1973		lncRNA:CR46057	FBgn0267724	CR46057
mir-14	FBgn0262447	CR43013		lncRNA:CR45996	FBgn0267658	CR45996						Drep2	FBgn0028408	CG1975		lncRNA:CR46078	FBgn0267747	CR46078
mir-279	FBgn0262448	CR43015		lncRNA:CR45998	FBgn0267660	CR45998						CG2004	FBgn0030060	CG2004		asRNA:CR46082	FBgn0267751	CR46082
mir-2493	FBgn0262315	CR43022		asRNA:CR46005	FBgn0267667	CR46005						Taf3	FBgn0026262	CG2009		lncRNA:CR46100	FBgn0267769	CR46100
CR43281	FBgn0262970	CR43281		lncRNA:CR46017	FBgn0267681	CR46017						FipoQ	FBgn0039667	CG2010		lncRNA:CR46114	FBgn0267783	CR46114
lncRNA:CR43334	FBgn0286827	CR43334		lncRNA:CR46043	FBgn0267710	CR46043						CG2017	FBgn0037391	CG2017		lncRNA:CR46116	FBgn0267785	CR46116
lncRNA:CR43651	FBgn0263660	CR43651		lncRNA:CR46057	FBgn0267724	CR46057						Nrd1	FBgn0030344	CG2025		lncRNA:CR46120	FBgn0267789	CR46120
lncRNA:CR43682	FBgn0263765	CR43682		lncRNA:CR46077	FBgn0267746	CR46077						CkIalpha	FBgn0015024	CG2028		lncRNA:CR46122	FBgn0267797	CR46122
lncRNA:CR43849	FBgn0264431	CR43849		lncRNA:CR46078	FBgn0267747	CR46078						CSN7	FBgn0028836	CG2038		lncRNA:CR46215	FBgn0267935	CR46215
asRNA:CR43889	FBgn0264481	CR43889		lncRNA:CR46120	FBgn0267789	CR46120						lgs	FBgn0039907	CG2041		lncRNA:CR46216	FBgn0267936	CR46216
asRNA:CR44019	FBgn0264789	CR44019		lncRNA:CR46238	FBgn0267958	CR46238						Ser7	FBgn0019929	CG2045		lncRNA:CR46221	FBgn0267941	CR46221
lncRNA:CR44060	FBgn0264869	CR44060		lncRNA:CR46241	FBgn0267961	CR46241						ftz	FBgn0001077	CG2047		lncRNA:CR46241	FBgn0267961	CR46241
lncRNA:CR44387	FBgn0265537	CR44387		lncRNA:CR46268	FBgn0278598	CR46268						Pkn	FBgn0020621	CG2049		lncRNA:CR46242	FBgn0267962	CR46242
lncRNA:CR44498	FBgn0265691	CR44498		lncRNA:TS6	FBgn0284415	CR46329						mod	FBgn0002780	CG2050		lncRNA:CR46247	FBgn0267969	CR46247
lncRNA:CR44582	FBgn0265793	CR44582		lncRNA:TS20	FBgn0284417	CR46331						Hat1	FBgn0037376	CG2051		mir-9376	FBgn0283547	CR46281
lncRNA:CR44584	FBgn0265795	CR44584			FBgn0004364							CG2061	FBgn0027498	CG2061		mir-9381	FBgn0283548	CR46282
lncRNA:CR44828	FBgn0266086	CR44828			FBgn0022772							drpr	FBgn0027594	CG2086		mir-9375	FBgn0283558	CR46292
lncRNA:CR44933	FBgn0266238	CR44933			FBgn0032361							PEK	FBgn0037327	CG2087		CR46300	FBgn0283627	CR46300
lncRNA:CR44945	FBgn0266250	CR44945			FBgn0034496							CG2091	FBgn0037372	CG2091		lncRNA:TS3	FBgn0284411	CR46325
lncRNA:CR44952	FBgn0266257	CR44952			FBgn0037010							scra	FBgn0261385	CG2092		lncRNA:TS27	FBgn0284420	CR46334
lncRNA:CR44991	FBgn0266326	CR44991			FBgn0259234							Sec8	FBgn0266672	CG2095			FBgn0032276
asRNA:CR45124	FBgn0266617	CR45124			FBgn0259822							mRpS35	FBgn0035374	CG2101			FBgn0032361
asRNA:CR45135	FBgn0266628	CR45135			FBgn0262511							cas	FBgn0004878	CG2102			FBgn0037010
lncRNA:CR45223	FBgn0266750	CR45223										CPT2	FBgn0035383	CG2107			FBgn0259680
lncRNA:CR45346	FBgn0266885	CR45346										Rab23	FBgn0037364	CG2108
lncRNA:CR45393	FBgn0266942	CR45393										mRpL44	FBgn0037330	CG2109
lncRNA:CR45410	FBgn0266959	CR45410										Cyp4ad1	FBgn0033292	CG2110
lncRNA:CR45463	FBgn0267019	CR45463										CG2111	FBgn0030223	CG2111
lncRNA:CR45550	FBgn0267110	CR45550										PIG-G	FBgn0033187	CG2144
asRNA:CR45909	FBgn0267569	CR45909										CG2145	FBgn0030251	CG2145
lncRNA:CR45916	FBgn0267576	CR45916										CG2147	FBgn0030025	CG2147
asRNA:CR45927	FBgn0267589	CR45927										Trxr-1	FBgn0020653	CG2151
lncRNA:CR46006	FBgn0267668	CR46006										CG2157	FBgn0030244	CG2157
lncRNA:CR46024	FBgn0267688	CR46024										CG2162	FBgn0035388	CG2162
lncRNA:CR46028	FBgn0267692	CR46028										Xe7	FBgn0010772	CG2179
asRNA:CR46105	FBgn0267774	CR46105										Gasz	FBgn0033273	CG2183
lncRNA:CR46116	FBgn0267785	CR46116										Mlc2	FBgn0002773	CG2184
lncRNA:CR46126	FBgn0267801	CR46126										elm	FBgn0037358	CG2185
mir-9374	FBgn0283561	CR46295										Dfd	FBgn0000439	CG2189
	FBgn0004364											salt	FBgn0039872	CG2196
	FBgn0031842											Ama	FBgn0000071	CG2198
	FBgn0033359											CG2202	FBgn0030240	CG2202
	FBgn0259234											Galphao	FBgn0001122	CG2204
	FBgn0259979											CG2224	FBgn0039773	CG2224
	FBgn0261014											CG2225	FBgn0032957	CG2225
												Gip	FBgn0011770	CG2227
												MTA1-like	FBgn0027951	CG2244
												CG2246	FBgn0039790	CG2246
												CG2247	FBgn0030320	CG2247
												fs(1)h	FBgn0004656	CG2252
												CG2258	FBgn0029997	CG2258
												Gclc	FBgn0040319	CG2259
												CG2260	FBgn0030000	CG2260
												Smox	FBgn0025800	CG2262
												Jra	FBgn0001291	CG2275
												CG2277	FBgn0035204	CG2277
												CG2278	FBgn0030017	CG2278
												ND-75	FBgn0017566	CG2286
												PIG-N	FBgn0033479	CG2292
												Trc8	FBgn0039668	CG2304
												eve	FBgn0000606	CG2328
												Neurochondrin	FBgn0037447	CG2330
												Ccp84Ag	FBgn0004777	CG2342
												Edg84A	FBgn0000552	CG2345
												psq	FBgn0263102	CG2368
												Ctr9	FBgn0035205	CG2469
												CG2493	FBgn0032864	CG2493
												lap	FBgn0086372	CG2520
												Cpr11B	FBgn0030398	CG2555
												RacGAP84C	FBgn0045843	CG2595
												CG2611	FBgn0032871	CG2611
												IKKepsilon	FBgn0086657	CG2615
												sgg	FBgn0003371	CG2621
												Fs(2)Ket	FBgn0262743	CG2637
												per	FBgn0003068	CG2647
												dyw	FBgn0000092	CG2650
												HLH3B	FBgn0011276	CG2655
												Spg7	FBgn0024992	CG2658
												kkv	FBgn0001311	CG2666
												Taf7	FBgn0024909	CG2670
												CG2685	FBgn0024998	CG2685
												CG2691	FBgn0030504	CG2691
												gsb-n	FBgn0001147	CG2692
												Pi3K21B	FBgn0020622	CG2699
												CG2701	FBgn0024973	CG2701
												Pbp95	FBgn0037540	CG2702
												fs(1)Ya	FBgn0000927	CG2707
												emp	FBgn0010435	CG2727
												CG2765	FBgn0035087	CG2765
												Snx1	FBgn0031534	CG2774
												Sf3b1	FBgn0031266	CG2807
												CG2812	FBgn0034931	CG2812
												Pph13	FBgn0023489	CG2819
												Shaw	FBgn0003386	CG2822
												CG2841	FBgn0003159	CG2841
												Raf	FBgn0003079	CG2845
												Tnpo-SR	FBgn0031456	CG2848
												Gsc	FBgn0010323	CG2851
												Tpc2	FBgn0035078	CG2857
												CG2887	FBgn0030207	CG2887
												PPP4R2r	FBgn0030208	CG2890
												ec	FBgn0000542	CG2904
												Dph4	FBgn0037350	CG2911
												Ets21C	FBgn0005660	CG2914
												CG2918	FBgn0023529	CG2918
												CG2924	FBgn0023528	CG2924
												VhaAC39-1	FBgn0285910	CG2934
												slp2	FBgn0004567	CG2939
												mxt	FBgn0031637	CG2950
												twi	FBgn0003900	CG2956
												mRpS9	FBgn0037529	CG2957
												Atet	FBgn0020762	CG2969
												Cpr23B	FBgn0031467	CG2973
												ems	FBgn0000576	CG2988
												CG2991	FBgn0031474	CG2991
												CG2993	FBgn0037521	CG2993
												fzr	FBgn0262699	CG3000
												CG30001	FBgn0050001	CG30001
												tea	FBgn0285892	CG30007
												gem	FBgn0050011	CG30011
												CG30015	FBgn0050015	CG30015
												Gga	FBgn0030141	CG3002
												CG30020	FBgn0050020	CG30020
												jeb	FBgn0086677	CG30040
												Cpr49Aa	FBgn0050045	CG30045
												CG30076	FBgn0050076	CG30076
												CG3008	FBgn0031643	CG3008
												Zasp52	FBgn0265991	CG30084
												Rif1	FBgn0050085	CG30085
												CG30089	FBgn0050089	CG30089
												jbug	FBgn0028371	CG30092
												CG30098	FBgn0050098	CG30098
												GEFmeso	FBgn0050115	CG30115
												CG30122	FBgn0050122	CG30122
												Hil	FBgn0050147	CG30147
												rig	FBgn0250850	CG30149
												CG30159	FBgn0050159	CG30159
												Usp30	FBgn0029819	CG3016
												su(w[a])	FBgn0003638	CG3019
												CG30203	FBgn0050203	CG30203
												GABA-B-R3	FBgn0031275	CG3022
												CG30222	FBgn0050222	CG30222
												stum	FBgn0050263	CG30263
												CG30268	FBgn0050268	CG30268
												CG30271	FBgn0050271	CG30271
												MFS1	FBgn0050272	CG30272
												Ipp	FBgn0016672	CG3028
												CG30291	FBgn0050291	CG30291
												Ipk1	FBgn0050295	CG30295
												CG30338	FBgn0050338	CG30338
												cm	FBgn0000330	CG3035
												CG30356	FBgn0050356	CG30356
												Mal-A6	FBgn0050360	CG30360
												CG30377	FBgn0050377	CG30377
												CG30384	FBgn0050384	CG30384
												Magi	FBgn0034590	CG30388
												CG30389	FBgn0050389	CG30389
												CG30391	FBgn0050391	CG30391
												CG30411	FBgn0050411	CG30411
												nord	FBgn0050418	CG30418
												CG30419	FBgn0050419	CG30419
												CG30431	FBgn0050431	CG30431
												Opbp	FBgn0050443	CG30443
												Tdc2	FBgn0050446	CG30446
												CG30460	FBgn0050460	CG30460
												CG30479	FBgn0050479	CG30479
												Prosap	FBgn0040752	CG30483
												CG30496	FBgn0050496	CG30496
												l(2)k05819	FBgn0022153	CG3054
												NTPase	FBgn0024947	CG3059
												CG3061	FBgn0038195	CG3061
												temp	FBgn0027296	CG3073
												Nf-YC	FBgn0029905	CG3075
												CG3078	FBgn0023524	CG3078
												CG3081	FBgn0025613	CG3081
												l(2)k09913	FBgn0021979	CG3082
												CG3085	FBgn0034816	CG3085
												MAPk-Ak2	FBgn0013987	CG3086
												qless	FBgn0051005	CG31005
												stops	FBgn0086704	CG31006
												Cad99C	FBgn0039709	CG31009
												CG31010	FBgn0051010	CG31010
												cindr	FBgn0027598	CG31012
												spdo	FBgn0260440	CG31020
												CG31028	FBgn0051028	CG31028
												Atg16	FBgn0039705	CG31033
												ca	FBgn0000247	CG31037
												CG31038	FBgn0051038	CG31038
												Mhcl	FBgn0026059	CG31045
												spg	FBgn0264324	CG31048
												CG31051	FBgn0051051	CG31051
												side	FBgn0016061	CG31062
												CG31068	FBgn0051068	CG31068
												CG3107	FBgn0033005	CG3107
												CG3108	FBgn0029807	CG3108
												LpR2	FBgn0051092	CG31092
												CG31098	FBgn0051098	CG31098
												TTLL5	FBgn0051108	CG31108
												CG31109	FBgn0051109	CG31109
												CG31121	FBgn0051121	CG31121
												CG31122	FBgn0051122	CG31122
												CG31128	FBgn0051128	CG31128
												Slimp	FBgn0051133	CG31133
												CG31140	FBgn0051140	CG31140
												CG31145	FBgn0051145	CG31145
												wge	FBgn0051151	CG31151
												SKIP	FBgn0051163	CG31163
												LSm3	FBgn0051184	CG31184
												CG3119	FBgn0031466	CG3119
												Dscam3	FBgn0261046	CG31190
												CG31195	FBgn0051195	CG31195
												CG31206	FBgn0051206	CG31206
												CG31211	FBgn0051211	CG31211
												CG31219	FBgn0051219	CG31219
												CG31221	FBgn0051221	CG31221
												CG31230	FBgn0051230	CG31230
												repo	FBgn0011701	CG31240
												tinc	FBgn0261649	CG31247
												IntS6	FBgn0261383	CG3125
												Cenp-C	FBgn0266916	CG31258
												CG31259	FBgn0051259	CG31259
												Pgk	FBgn0250906	CG3127
												rec	FBgn0003227	CG31293
												CG31294	FBgn0051294	CG31294
												CG31296	FBgn0051296	CG31296
												CG31301	FBgn0051301	CG31301
												Duox	FBgn0283531	CG3131
												stumps	FBgn0020299	CG31317
												Unc-115a	FBgn0051352	CG31352
												Jupiter	FBgn0051363	CG31363
												CG31388	FBgn0051388	CG31388
												CG31445	FBgn0051445	CG31445
												pch2	FBgn0051453	CG31453
												CG31457	FBgn0051457	CG31457
												pb	FBgn0051481	CG31481
												Pif2	FBgn0046873	CG31483
												CG3149	FBgn0027564	CG3149
												CG31495	FBgn0051495	CG31495
												CG31522	FBgn0051522	CG31522
												CG31523	FBgn0051523	CG31523
												NKCC	FBgn0051547	CG31547
												CG31550	FBgn0051550	CG31550
												PGAP1	FBgn0029789	CG3160
												Bsg	FBgn0261822	CG31605
												Vha16-1	FBgn0262736	CG3161
												sens-2	FBgn0051632	CG31632
												CG31635	FBgn0051635	CG31635
												CG31637	FBgn0051637	CG31637
												CG31638	FBgn0051638	CG31638
												CG3164	FBgn0025683	CG3164
												CG31642	FBgn0051642	CG31642
												CG31644	FBgn0051644	CG31644
												erm	FBgn0031375	CG31670
												tho2	FBgn0031390	CG31671
												CG31678	FBgn0051678	CG31678
												CG31688	FBgn0263355	CG31688
												Spt3	FBgn0037981	CG3169
												RluA-1	FBgn0051719	CG31719
												twf	FBgn0038206	CG3172
												Trim9	FBgn0051721	CG31721
												IntS1	FBgn0034964	CG3173
												yuri	FBgn0045842	CG31732
												AspRS-m	FBgn0051739	CG31739
												CG31769	FBgn0051769	CG31769
												CG31793	FBgn0051793	CG31793
												IA-2	FBgn0031294	CG31795
												RpII140	FBgn0262955	CG3180
												CenG1A	FBgn0028509	CG31811
												nur	FBgn0051813	CG31813
												CG31861	FBgn0051861	CG31861
												Samuel	FBgn0032330	CG31868
												CG31871	FBgn0051871	CG31871
												CG31875	FBgn0051875	CG31875
												Trx-2	FBgn0040070	CG31884
												CG31908	FBgn0051908	CG31908
												CG31909	FBgn0051909	CG31909
												Nepl3	FBgn0031678	CG31918
												CG31935	FBgn0051935	CG31935
												Hsepi	FBgn0033087	CG3194
												Cda5	FBgn0051973	CG31973
												Mlc-c	FBgn0004687	CG3201
												Argk	FBgn0000116	CG32031
												fry	FBgn0016081	CG32045
												scramb1	FBgn0052056	CG32056
												Rbfox1	FBgn0052062	CG32062
												CG32066	FBgn0052066	CG32066
												simj	FBgn0010762	CG32067
												CG32095	FBgn0052095	CG32095
												rols	FBgn0041096	CG32096
												CG32099	FBgn0052099	CG32099
												Drp1	FBgn0026479	CG3210
												SCaMC	FBgn0052103	CG32103
												Lmx1a	FBgn0052105	CG32105
												Vps13D	FBgn0052113	CG32113
												sens	FBgn0002573	CG32120
												stv	FBgn0086708	CG32130
												Ptip	FBgn0052133	CG32133
												btl	FBgn0285896	CG32134
												Nxf3	FBgn0263232	CG32135
												Mbs	FBgn0005536	CG32156
												dsx-c73A	FBgn0261799	CG32159
												Rbp6	FBgn0260943	CG32169
												CG32170	FBgn0052170	CG32170
												fs(1)K10	FBgn0000810	CG3218
												Eip74EF	FBgn0000567	CG32180
												CG32181	FBgn0052181	CG32181
												edin	FBgn0052185	CG32185
												Ltn1	FBgn0262517	CG32210
												Pex23	FBgn0052226	CG32226
												CG3223	FBgn0037538	CG3223
												TTLL1B	FBgn0052238	CG32238
												CG32264	FBgn0052264	CG32264
												kz	FBgn0001330	CG3228
												Mrtf	FBgn0052296	CG32296
												oxt	FBgn0015360	CG32300
												CG32301	FBgn0052301	CG32301
												snama	FBgn0086129	CG3231
												CG32313	FBgn0052313	CG32313
												Naa30B	FBgn0052319	CG32319
												CG32344	FBgn0052344	CG32344
												CG32354	FBgn0052354	CG32354
												ImpE1	FBgn0001253	CG32356
												CG32369	FBgn0052369	CG32369
												Rsph3	FBgn0052392	CG32392
												CG32396	FBgn0052396	CG32396
												Cpr65Av	FBgn0052405	CG32405
												msl-2	FBgn0005616	CG3241
												sob	FBgn0004892	CG3242
												shep	FBgn0052423	CG32423
												CG32425	FBgn0052425	CG32425
												siz	FBgn0026179	CG32434
												chb	FBgn0021760	CG32435
												Atox1	FBgn0052446	CG32446
												CG32447	FBgn0052447	CG32447
												SPoCk	FBgn0052451	CG32451
												mtd	FBgn0013576	CG32464
												CG32473	FBgn0052473	CG32473
												Sk2	FBgn0052484	CG32484
												cpx	FBgn0041605	CG32490
												mod(mdg4)	FBgn0002781	CG32491
												dnc	FBgn0000479	CG32498
												CG32512	FBgn0052512	CG32512
												Hers	FBgn0052529	CG32529
												CG32532	FBgn0052532	CG32532
												CG32537	FBgn0052537	CG32537
												CG32554	FBgn0052554	CG32554
												RhoGAPp190	FBgn0026375	CG32555
												Mco4	FBgn0052557	CG32557
												disco-r	FBgn0285879	CG32577
												Flo2	FBgn0264078	CG32593
												CG32603	FBgn0052603	CG32603
												Tpst	FBgn0086674	CG32632
												CG32633	FBgn0052633	CG32633
												CG32645	FBgn0052645	CG32645
												Mccc2	FBgn0042083	CG3267
												Atg8a	FBgn0052672	CG32672
												Rab9E	FBgn0052673	CG32673
												Tango5	FBgn0052675	CG32675
												CG32681	FBgn0052681	CG32681
												CG32683	FBgn0052683	CG32683
												CG32686	FBgn0052686	CG32686
												Ptpmeg2	FBgn0028341	CG32697
												CARPB	FBgn0052698	CG32698
												CG32700	FBgn0267253	CG32700
												CG32708	FBgn0052708	CG32708
												PGAP3	FBgn0033088	CG3271
												sdt	FBgn0261873	CG32717
												nonC	FBgn0263968	CG32743
												CG32762	FBgn0052762	CG32762
												CG32767	FBgn0052767	CG32767
												CG32772	FBgn0052772	CG32772
												CG32793	FBgn0052793	CG32793
												CG32795	FBgn0040384	CG32795
												inc	FBgn0025394	CG32810
												CG32812	FBgn0025642	CG32812
												CG32813	FBgn0052813	CG32813
												SdhB	FBgn0014028	CG3283
												Dh31-R	FBgn0052843	CG32843
												CG32846	FBgn0052846	CG32846
												CG32847	FBgn0052847	CG32847
												sn	FBgn0003447	CG32858
												CG32944	FBgn0052944	CG32944
												Sou	FBgn0034573	CG3295
												RNaseZ	FBgn0028426	CG3298
												CG32982	FBgn0052982	CG32982
												EndoU	FBgn0038381	CG3303
												PR-Set7	FBgn0011474	CG3307
												CG33080	FBgn0053080	CG33080
												LRP1	FBgn0053087	CG33087
												CG33090	FBgn0028916	CG33090
												CG33096	FBgn0053096	CG33096
												Ppn	FBgn0003137	CG33103
												CG33111	FBgn0053111	CG33111
												Rtnl1	FBgn0053113	CG33113
												Rnp4F	FBgn0014024	CG3312
												CG33129	FBgn0053129	CG33129
												CG33137	FBgn0053137	CG33137
												Impbeta11	FBgn0284254	CG33139
												CG33140	FBgn0053140	CG33140
												sns	FBgn0024189	CG33141
												CG33144	FBgn0053144	CG33144
												GalT1	FBgn0053145	CG33145
												SrpRbeta	FBgn0011509	CG33162
												CG33169	FBgn0053169	CG33169
												Ranbp16	FBgn0053180	CG33180
												Kdm4B	FBgn0053182	CG33182
												Hr3	FBgn0000448	CG33183
												dpy	FBgn0053196	CG33196
												mbl	FBgn0265487	CG33197
												VepD	FBgn0053200	CG33200
												CG33203	FBgn0053203	CG33203
												Gmap	FBgn0027287	CG33206
												CG33230	FBgn0053230	CG33230
												CG33233	FBgn0053233	CG33233
												CG33278	FBgn0053278	CG33278
												CG3328	FBgn0034985	CG3328
												e	FBgn0000527	CG3331
												OtopLb	FBgn0031514	CG3332
												CG33332	FBgn0067629	CG33332
												CG33342	FBgn0086610	CG33342
												CG3335	FBgn0036018	CG3335
												CG3339	FBgn0039510	CG3339
												CG33465	FBgn0053465	CG33465
												qvr	FBgn0260499	CG33472
												att-ORFB	FBgn0067782	CG33488
												bigmax	FBgn0039509	CG3350
												CG33506	FBgn0053506	CG33506
												dpr4	FBgn0053512	CG33512
												Nmdar2	FBgn0053513	CG33513
												CG33523	FBgn0053523	CG33523
												Smyd5	FBgn0038869	CG3353
												SmydA-8	FBgn0053548	CG33548
												form3	FBgn0053556	CG33556
												CG3356	FBgn0034989	CG3356
												CG3358	FBgn0033117	CG3358
												ocm	FBgn0266083	CG3363
												drongo	FBgn0020304	CG3365
												CG33654	FBgn0053654	CG33654
												ebd1	FBgn0035153	CG3371
												PGRP-LD	FBgn0260458	CG33717
												Pif1B	FBgn0046874	CG33720
												CG33723	FBgn0053723	CG33723
												CG3376	FBgn0034997	CG3376
												CG33764	FBgn0053764	CG33764
												CG33774	FBgn0053774	CG33774
												nvy	FBgn0005636	CG3385
												gsb	FBgn0001148	CG3388
												CheB74a	FBgn0261294	CG33924
												CG33928	FBgn0053928	CG33928
												kay	FBgn0001297	CG33956
												CG33958	FBgn0053958	CG33958
												Sema2b	FBgn0264273	CG33960
												capt	FBgn0261458	CG33979
												Vsx2	FBgn0263512	CG33980
												nuf	FBgn0013718	CG33991
												CG33993	FBgn0053993	CG33993
												Pfrx	FBgn0027621	CG3400
												betaTub60D	FBgn0003888	CG3401
												CG34028	FBgn0054028	CG34028
												CG3407	FBgn0031573	CG3407
												chk	FBgn0033095	CG3409
												mld	FBgn0263490	CG34100
												bs	FBgn0004101	CG3411
												lobo	FBgn0083946	CG34110
												CG34115	FBgn0083951	CG34115
												slmb	FBgn0283468	CG3412
												CG34126	FBgn0083962	CG34126
												CG34129	FBgn0083965	CG34129
												CG34135	FBgn0083971	CG34135
												CG34140	FBgn0083976	CG34140
												CG34141	FBgn0083977	CG34141
												Dys	FBgn0260003	CG34157
												Rpn8	FBgn0002787	CG3416
												CG34164	FBgn0085193	CG34164
												CG34179	FBgn0085208	CG34179
												CG34181	FBgn0085210	CG34181
												CG34193	FBgn0085222	CG34193
												CG34194	FBgn0085223	CG34194
												CG34202	FBgn0085231	CG34202
												CG34206	FBgn0085235	CG34206
												RhoGAP93B	FBgn0038853	CG3421
												CG34210	FBgn0085239	CG34210
												CG34215	FBgn0085244	CG34215
												Prosalpha4	FBgn0004066	CG3422
												CG34221	FBgn0085250	CG34221
												CG34222	FBgn0250822	CG34222
												SA	FBgn0020616	CG3423
												CG34266	FBgn0085295	CG34266
												CG34273	FBgn0085302	CG34273
												CG34276	FBgn0085305	CG34276
												CG34277	FBgn0085306	CG34277
												CG34286	FBgn0085315	CG34286
												CG34289	FBgn0085318	CG34289
												CG34310	FBgn0085339	CG34310
												CG34324	FBgn0085353	CG34324
												CG34325	FBgn0085354	CG34325
												CG34327	FBgn0085356	CG34327
												Diedel3	FBgn0085358	CG34329
												Coprox	FBgn0021944	CG3433
												CG34330	FBgn0085359	CG34330
												Pde11	FBgn0085370	CG34341
												CG34342	FBgn0085371	CG34342
												CG34347	FBgn0085376	CG34347
												Np	FBgn0265011	CG34350
												CG34355	FBgn0085384	CG34355
												Glut4EF	FBgn0267336	CG34360
												trv	FBgn0085391	CG34362
												CG34367	FBgn0085396	CG34367
												Fili	FBgn0085397	CG34368
												CG34376	FBgn0085405	CG34376
												Pvf3	FBgn0085407	CG34378
												Shrm	FBgn0085408	CG34379
												smal	FBgn0085409	CG34380
												kmr	FBgn0085412	CG34383
												dpr12	FBgn0085414	CG34385
												futsch	FBgn0259108	CG34387
												cv-c	FBgn0285955	CG34389
												Rgk2	FBgn0085419	CG34390
												Epac	FBgn0085421	CG34392
												GramD1B	FBgn0085423	CG34394
												nub	FBgn0085424	CG34395
												CG34396	FBgn0085425	CG34396
												CG34398	FBgn0085427	CG34398
												Nox	FBgn0085428	CG34399
												NaCP60E	FBgn0085434	CG34405
												Not1	FBgn0085436	CG34407
												Rab26	FBgn0086913	CG34410
												Tlk	FBgn0283657	CG34412
												NKAIN	FBgn0085442	CG34413
												spri	FBgn0085443	CG34414
												sif	FBgn0085447	CG34418
												htk	FBgn0085451	CG34422
												Mthfs	FBgn0085453	CG34424
												CG34435	FBgn0085464	CG34435
												Cap-G	FBgn0259876	CG34438
												Zdhhc8	FBgn0085478	CG34449
												CG34450	FBgn0085479	CG34450
												Nmd3	FBgn0023542	CG3460
												betaggt-I	FBgn0015000	CG3469
												MME1	FBgn0031881	CG3476
												Pxd	FBgn0004577	CG3477
												CG3483	FBgn0035005	CG3483
												Hydr2	FBgn0014906	CG3488
												vir	FBgn0003977	CG3496
												Hexim	FBgn0038251	CG3508
												CG3515	FBgn0031431	CG3515
												CG3517	FBgn0038706	CG3517
												FASN1	FBgn0283427	CG3523
												Mtmr6	FBgn0028497	CG3530
												GCC185	FBgn0037979	CG3532
												pio	FBgn0020521	CG3541
												CG3546	FBgn0029716	CG3546
												CG3556	FBgn0029708	CG3556
												CG3558	FBgn0025681	CG3558
												Dbp21E2	FBgn0086130	CG3561
												CHOp24	FBgn0029709	CG3564
												Or59b	FBgn0034865	CG3569
												Samtor	FBgn0035035	CG3570
												bi	FBgn0000179	CG3578
												CG3588	FBgn0025643	CG3588
												AdSL	FBgn0038467	CG3590
												Btnd	FBgn0029848	CG3599
												CG3603	FBgn0029648	CG3603
												CG3604	FBgn0031562	CG3604
												Sf3b2	FBgn0031493	CG3605
												Adck1	FBgn0035039	CG3608
												CG3611	FBgn0035069	CG3611
												blw	FBgn0011211	CG3612
												Dl	FBgn0000463	CG3619
												babos	FBgn0034724	CG3624
												CG3625	FBgn0031245	CG3625
												Dll	FBgn0000157	CG3629
												CG3631	FBgn0038268	CG3631
												CG3634	FBgn0037026	CG3634
												CG3638	FBgn0261444	CG3638
												CG3645	FBgn0031238	CG3645
												stc	FBgn0001978	CG3647
												CG3650	FBgn0035070	CG3650
												CG3651	FBgn0032974	CG3651
												kirre	FBgn0028369	CG3653
												Jarid2	FBgn0036004	CG3654
												CG3655	FBgn0040397	CG3655
												Cyp4d1	FBgn0005670	CG3656
												RpL23	FBgn0010078	CG3661
												CG3662	FBgn0031285	CG3662
												fd59A	FBgn0004896	CG3668
												Mvl	FBgn0011672	CG3671
												Cpsf5	FBgn0035987	CG3689
												CG3690	FBgn0040350	CG3690
												MED23	FBgn0034795	CG3695
												CG3700	FBgn0034796	CG3700
												CG3703	FBgn0040348	CG3703
												wapl	FBgn0004655	CG3707
												CG3708	FBgn0040345	CG3708
												Naprt	FBgn0031589	CG3714
												bcn92	FBgn0013432	CG3717
												shg	FBgn0003391	CG3722
												Dhc93AB	FBgn0013812	CG3723
												CG3732	FBgn0034750	CG3732
												Chd1	FBgn0250786	CG3733
												Cks30A	FBgn0010314	CG3738
												MTF-1	FBgn0040305	CG3743
												CG3748	FBgn0032110	CG3748
												esg	FBgn0287768	CG3758
												CG3764	FBgn0036684	CG3764
												scat	FBgn0011232	CG3766
												a6	FBgn0023130	CG3771
												cry	FBgn0025680	CG3772
												Gdn1	FBgn0038692	CG3773
												CG3781	FBgn0029853	CG3781
												CG3795	FBgn0025378	CG3795
												Ugt316A1	FBgn0036842	CG3797
												Edem1	FBgn0023511	CG3810
												Oatp30B	FBgn0032123	CG3811
												CG3815	FBgn0029861	CG3815
												Nup214	FBgn0010660	CG3820
												KaiR1D	FBgn0038837	CG3822
												CG3823	FBgn0029863	CG3823
												PPP1R15	FBgn0034948	CG3825
												D2hgdh	FBgn0023507	CG3835
												CG3841	FBgn0032131	CG3841
												CG3842	FBgn0029866	CG3842
												NAT1	FBgn0010488	CG3845
												CG3847	FBgn0029867	CG3847
												trr	FBgn0023518	CG3848
												Lasp	FBgn0063485	CG3849
												odd	FBgn0002985	CG3851
												CG3857	FBgn0023520	CG3857
												gcm2	FBgn0019809	CG3858
												RabX1	FBgn0015372	CG3870
												Mdr49	FBgn0004512	CG3879
												SelT	FBgn0031670	CG3887
												CG3906	FBgn0034871	CG3906
												mtTFB2	FBgn0037778	CG3910
												CG3918	FBgn0029873	CG3918
												Reph	FBgn0021800	CG3920
												ebo	FBgn0266572	CG3923
												dx	FBgn0000524	CG3929
												N	FBgn0004647	CG3936
												cher	FBgn0014141	CG3937
												pita	FBgn0034878	CG3941
												csw	FBgn0000382	CG3954
												CG3955	FBgn0033793	CG3955
												pelo	FBgn0011207	CG3959
												Keap1	FBgn0038475	CG3962
												Tat	FBgn0035989	CG3967
												Baldspot	FBgn0260960	CG3971
												Ctr1A	FBgn0062413	CG3977
												pnr	FBgn0003117	CG3978
												Cep97	FBgn0031575	CG3980
												Unc-76	FBgn0040395	CG3981
												srp	FBgn0003507	CG3992
												zf30C	FBgn0270924	CG3998
												Pfk	FBgn0003071	CG4001
												Akt1	FBgn0010379	CG4006
												IP3K1	FBgn0032147	CG4026
												RpI135	FBgn0003278	CG4033
												CG4041	FBgn0029736	CG4041
												CG4042	FBgn0037018	CG4042
												egl	FBgn0000562	CG4051
												Cpr5C	FBgn0029811	CG4052
												tamo	FBgn0041582	CG4057
												Nep4	FBgn0038818	CG4058
												ftz-f1	FBgn0001078	CG4059
												ValRS	FBgn0027079	CG4062
												pug	FBgn0020385	CG4067
												CG4073	FBgn0037827	CG4073
												Nufip	FBgn0036812	CG4076
												Taf11	FBgn0011291	CG4079
												Mo25	FBgn0017572	CG4083
												Alg3	FBgn0011297	CG4084
												Orc3	FBgn0005654	CG4088
												TTLL15	FBgn0037838	CG4089
												CG41099	FBgn0039955	CG41099
												RpL35	FBgn0029785	CG4111
												ex	FBgn0004583	CG4114
												svr	FBgn0004648	CG4122
												Vsx1	FBgn0263511	CG4136
												mbf1	FBgn0262732	CG4143
												Col4a1	FBgn0000299	CG4145
												wek	FBgn0001990	CG4148
												CG4151	FBgn0029770	CG4151
												vig	FBgn0024183	CG4170
												l(3)73Ah	FBgn0002283	CG4195
												sl	FBgn0003416	CG4200
												Mau2	FBgn0038300	CG4203
												EloB	FBgn0023212	CG4204
												bbg	FBgn0087007	CG42230
												CG42232	FBgn0250754	CG42232
												CG42233	FBgn0250755	CG42233
												Dbx	FBgn0261723	CG42234
												CG42238	FBgn0250867	CG42238
												DCX-EMAP	FBgn0259099	CG42247
												Hmt-1	FBgn0038376	CG4225
												lqfR	FBgn0261279	CG42250
												CG42258	FBgn0259143	CG42258
												CG42260	FBgn0259145	CG42260
												fid	FBgn0259146	CG42261
												OtopLc	FBgn0259150	CG42265
												CG42268	FBgn0259163	CG42268
												CG42271	FBgn0259166	CG42271
												CG42272	FBgn0259167	CG42272
												mnb	FBgn0259168	CG42273
												RhoGAP18B	FBgn0261461	CG42274
												alpha-Man-Ia	FBgn0259170	CG42275
												Pde9	FBgn0259171	CG42276
												rn	FBgn0267337	CG42277
												bun	FBgn0259176	CG42281
												CG4229	FBgn0036639	CG4229
												Ir60d	FBgn0259187	CG42291
												CG4230	FBgn0031683	CG4230
												CG42302	FBgn0259198	CG42302
												CG42306	FBgn0259202	CG42306
												grh	FBgn0259211	CG42311
												Csk	FBgn0262081	CG42317
												app	FBgn0260941	CG42318
												CG42319	FBgn0259219	CG42319
												Doa	FBgn0265998	CG42320
												CG42323	FBgn0259223	CG42323
												CG42326	FBgn0259226	CG42326
												CG42327	FBgn0259227	CG42327
												C3G	FBgn0259228	CG42328
												CG42331	FBgn0259233	CG42331
												CG42336	FBgn0259238	CG42336
												CG42337	FBgn0259239	CG42337
												Pka-R1	FBgn0259243	CG42341
												CG42342	FBgn0259244	CG42342
												brp	FBgn0259246	CG42344
												sqa	FBgn0259678	CG42347
												CG42367	FBgn0259713	CG42367
												CG42369	FBgn0259715	CG42369
												ArfGAP1	FBgn0020655	CG4237
												Nepl6	FBgn0259716	CG42370
												CG42376	FBgn0259722	CG42376
												CG4238	FBgn0031384	CG4238
												CG42382	FBgn0259728	CG42382
												mtgo	FBgn0259735	CG42389
												CG4239	FBgn0030745	CG4239
												CG42404	FBgn0259823	CG42404
												Su(dx)	FBgn0003557	CG4244
												CG42446	FBgn0259917	CG42446
												inaF-B	FBgn0259918	CG42447
												Sfp77F	FBgn0259972	CG42482
												CG42496	FBgn0260222	CG42496
												MED9	FBgn0260401	CG42517
												CG42524	FBgn0260429	CG42524
												Ziz	FBgn0260486	CG42533
												CG42534	FBgn0260487	CG42534
												CG42540	FBgn0260657	CG42540
												CG42542	FBgn0260659	CG42542
												CG42544	FBgn0260713	CG42544
												CG42553	FBgn0260755	CG42553
												CG42556	FBgn0260758	CG42556
												inaF-D	FBgn0260812	CG42563
												CG42568	FBgn0260770	CG42568
												Stat92E	FBgn0016917	CG4257
												MCPH1	FBgn0260959	CG42572
												NaPi-III	FBgn0260795	CG42575
												CG42588	FBgn0260965	CG42588
												Pif1A	FBgn0261015	CG42599
												AP-2alpha	FBgn0264855	CG4260
												Cad86C	FBgn0261053	CG42601
												Hel89B	FBgn0022787	CG4261
												plx	FBgn0261261	CG42612
												Cul3	FBgn0261268	CG42616
												elav	FBgn0260400	CG4262
												CG42650	FBgn0261502	CG42650
												CG42663	FBgn0261545	CG42663
												Exn	FBgn0261547	CG42665
												prage	FBgn0283741	CG42666
												CG42668	FBgn0261550	CG42668
												ps	FBgn0261552	CG42670
												CG42671	FBgn0261553	CG42671
												CG42672	FBgn0261554	CG42672
												CG42673	FBgn0261555	CG42673
												CG42675	FBgn0261561	CG42675
												wb	FBgn0261563	CG42677
												ReepA	FBgn0261564	CG42678
												Lmpt	FBgn0261565	CG42679
												CoRest	FBgn0261573	CG42687
												pdm3	FBgn0261588	CG42698
												CG42699	FBgn0261610	CG42699
												CG4270	FBgn0031407	CG4270
												CG42700	FBgn0261611	CG42700
												Oaz	FBgn0284250	CG42702
												Axud1	FBgn0261647	CG4272
												CG42727	FBgn0261680	CG42727
												B9d2	FBgn0261683	CG42730
												SLO2	FBgn0261698	CG42732
												Ank2	FBgn0261788	CG42734
												fzy	FBgn0001086	CG4274
												CG42741	FBgn0261705	CG42741
												CG42748	FBgn0261802	CG42748
												Msp300	FBgn0261836	CG42768
												CG4278	FBgn0014092	CG4278
												aPKC	FBgn0261854	CG42783
												CG42784	FBgn0263354	CG42784
												5-HT2B	FBgn0261929	CG42796
												CG42797	FBgn0261931	CG42797
												dikar	FBgn0261934	CG42799
												CG42813	FBgn0261995	CG42813
												CG42851	FBgn0262098	CG42851
												Sik3	FBgn0262103	CG42856
												f	FBgn0262111	CG42864
												trh	FBgn0262139	CG42865
												MFS9	FBgn0038799	CG4288
												Sik2	FBgn0025625	CG4290
												CG4293	FBgn0024983	CG4293
												CG4294	FBgn0034742	CG4294
												Sms	FBgn0036272	CG4300
												Bap60	FBgn0025463	CG4303
												CG43055	FBgn0262357	CG43055
												CG43057	FBgn0262359	CG43057
												bru2	FBgn0262475	CG43065
[truncated: 1,436 more rows]
